# Supplementary material for: Properties of steam exploded orange peel fiber as compared to commercial citrus fiber and peel powders
Source: Royal Society of Chemistry journal article supplement (doi:10.1039/d4fb00286e), 2025-01-01
Supplement: d4fb00286e1.xlsx [file d4fb00286e1.xlsx]

## Sheet: Table S1
	Table S1. Comparison of the U.S. Horticultural Research Laboratory (USHRL) Batch Steam Explosion System with other methods of producing dietary citrus fiber using steam explosion from the literature and patents.
	Reference	Widmer (10)	Wang (34)	Sample (37-39)	Yuan (35)	Weibel (36)	Hansen (40,41)	Van Leeuwen (42-44)	Wijma (45)	Van Leeuwen (46-48)	Staunstrup (49-54)	Gusakov (55-58)	Gusek (59)
	Continuous or Batch	Batch	Batch	Continuous	Batch	Batch	Continuous & Batch	Continuous & Batch	Continuous & Batch	Continuous & Batch	Batch	Batch	Batch
				(Alternation between steam injection and pressing)
	Sample Size or Feed Rate	600 g	500 g	Not Specified	500 g	N/A	N/A	N/A	N/A	N/A	N/A	N/A	N/A
	Pre-treatment	None	Sulfuric Acid	None	None	Heat & Acid	Alcohol, Acid	Alcohol, Acid, Heat	Alcohol, Acid	Alcohol, Acid	Alcohol, Water wash	Alcohol, Acid	Alcohol, Acid
	Feedstock	Fitz-Milled Wet Citrus Juice Processing Waste	Ground, Dried, Hand Peeled Orange Peel	Size reduced, de-seeded peel	Pomelo peel	Sugar beet and Citrus pulp	Citrus peel, fruit, vesicles	Citrus peel, citrus pulp	Citrus peel, Citrus pulp	Citrus Peel, Citrus Pulp	Citrus peel, Citrus pulp	Citrus peel, Citrus pulp	Citrus peel
	Pressure (Temperature) Range	30 – 110 psi	58 – 174 psi	5 – 35 psi	87-174 psi	165°C	Greater than or about 40°C	100 °C-260 °C	150 °C-220 °C	150 °C-220 °C	≥40 oC or Not Stated	121°C	80°C-100°C
		(130 – 170 oC)	(Temp. Not Specified)	(>121 oC)	(Temp. Not Specified)
	Hold Times	Unlimited	3 – 11 min	Not Specified	80, 120, 160 seconds	170 seconds	5 min.- 2hrs.	5min-2hrs	1-30min.	1-30min.	10min.-1hr. or Not Stated	15min	5-10min.
	Moisture Added to Feedstock	Up to 15% (Depending on Hold Time)	N/A	0.1	N/A	N/A	N/A	N/A	N/A	N/A	N/A	N/A	N/A
	10 W. Widmer, W. Zhou, K. Grohmann, Bioresour. Technol., 2010, 101, 5242-5249, DOI: 10.1016/j.biortech.2009.12.038.
	34 L. Wang, H. Xu, F. Yuan, R. Fan and Y. Gao, Food Chem., 2015, 185, 90-98, DOI: 10.1016/j.foodchem.2015.03.112.
	35 Z. Yuan, J. Yan, Q. Zhang, J. Zheng and A. Hu, Aijun, Int. J. Food Eng., 2023, 19 (10), 457-465, DOI: 10.1515/ijfe-2023-0099.
	36 M.K. Weibel, 1989, Parenchymal cell cellulose and related materials, US Patent Number 4,831,127.
	37 E.W. Sample, 2011, System and method for continuous steam injected citrus peel cellular expansion, US Patent Number 8,017,171.
	38 E.W. Sample, 2013, System and method for continuous citrus peel cellular expansion. US Patent Number 8,383,186.
	39 E.W. Sample, 2015, System and method for continuous citrus peel cellular expansion, US Patent Number 9,192,182.
	40 J.H. Hansen, W.D. Henrickson, H.L. Pedersen, T.E. Pedersen and J.A. Staunstrup, 2020, Activated Pectin-Containing Biomass Compositions, Products, and Methods of Producing, US Patent Number 20200046008 A1.
	41 J.H. Hansen, W.D. Henrickson, H.L. Pedersen, T.E. Pedersen and J.A. Staunstrup, 2023, Activated Pectin-Containing Biomass Compositions, Products, Methods Of Producing, US Patent Number: 20230085193 A1.
	42 J.G.E. Van Leeuwen and L.E. Bevers, 2019, Polypeptides Having Cellulolytic Enhancing Activity And Uses Thereof, US Patent Number 20190345461 A1.
	43 J.G.E. Van Leeuwen and L.E. Bevers, 2021, Polypeptides Having Cellulolytic Enhancing Activity And Uses Thereof. US Patent Number: 10913938 B2.
	44 J.G.E. Van Leeuwen and L.E. Bevers, 2021, Polypeptides Having Cellulolytic Enhancing Activity And Uses Thereof,US Patent Number: 20210123030 A1.
	45 H.J. Wijma, D.B. Janssen and J.G.E. Van Leeuwen, 2019, Beta-Glucosidase And Uses Thereof, US Patent Number 20190002860 A1.
	46 J.G.E. Van Leeuwen, 2018, Beta-Glucosidase And Uses Thereof, US Patent Number 20180362945 A1.
	47 J.G.E. Van Leeuwen, 2020, Beta-Glucosidase And Uses Thereof, US Patent Number 10808235 B2.
	48 J.G.E. Van Leeuwen, 2020, Beta-Glucosidase And Uses Thereof, US Patent Number: 20200392475 A1.
	49 J.A. Staunstrup, C. Klit, J.E. Trudsø, T.E. Pedersen and D.F. Hiscock, 2018, Activated Pectin-Containing Biomass Compositions, Products, And Methods Of Producing, US Patent Number 20180230242 A1.
	50 J.A. Staunstrup, C. Klit, J.E. Turdsø, T.E. Pedersen and D.F. Hiscock, DF, 2019, Activated Pectin-Containing Biomass Compositions, Products, and Methods Of Producing, US Patent Number: 20190112396 A1.
	51 J.A. Staunstrup, C. Klit, J.E. Turdsø, T.E. Pedersen and D.F. Hiscock, 2019, Methods Of Producing Activated Pectin-containing Biomass Compositions, US Patent Number: 10287366 B2.
	52 J.A. Staunstrup, C. Klit, J.E. Turdsø, T.E. Pedersen and D.F. Hiscock, 2021, Activated Pectin-containing Biomass Compositions And Products, US Patent Number: 11008407 B2.
	53 J.A. Staunstrup, C. Klit, J.E. Turdsø, T.E. Pedersen and D.F. Hiscock, DF, 2021, Activated Pectin-Containing Biomass Compositions, Products, And Methods Of Producing, US Patent Number: 20210189016 A1.
	54 J.A. Staunstrup, C. Klit, J.E. Turdsø, T.E. Pedersen and D.F. Hiscock, DF, 2023, Activated Pectin-Containing Biomass Compositions, Products, And Methods Of Producing, US Patent Number: 20230183387 A1.
	55 A.V. Gusakov, P.J. Punt, J.C. Verdoes, J. Van der Meij, A.P. Sinitsyn, E. Vlasenko, S.W.A. Hinz, M. Gosink and Z. Jiang, 2009, Novel Fungal Eneymes, US Patent Number 20090280105 A1.
	56 A.V. Gusakov, P.J. Punt, J.C. Verdoes, J. Van der Meij, A.P. Sinitsyn, E. Vlasenko, S.W.A. Hinz, M. Gosink and Z. Jiang, 2011, Fungal Enzymes, US Patent Number: 7923236 B2.
	57 A.V. Gusakov, P.J. Punt, J.C. Verdoes, J. Van der Meij, A.P. Sinitsyn, E. Vlasenko, S.W.A. Hinz, M. Gosink and Z. Jiang, 2012. Novel Fungal Enzymes. US Patent Number: 20120030838 A1.
	58 A.V. Gusakov, P.J. Punt, J.C. Verdoes, J. Van der Meij, A.P. Sinitsyn, E. Vlasenko, S.W.A. Hinz, M. Gosink and Z. Jiang, 2012, Novel Fungal Enzymes, US Patent Number: 20120036599 A1.
	59 T.W. Gusek, L. Zullo and A.M. Eyal, 2009, Process For Obtaining Pectin, US Patent Number 20090110798 A1.

## Sheet: Figure S1
	Figure S1. Diagram of Steam Explosion Batch System

## Sheet: Water Swelling Capacity
Swelling ml/g
R1	R2	R3	Average	Standard Dev	RSD	SAMPLE NAME		Commercial
10.9562	13	11.9166	11.9576	1.02253	8.5513	COM-Citrus Fiber
10.9671	10.9127	11.9166	11.2655	0.564545	5.01129	COM-Orange Peel Powder
9.92063	9.99001	9.96016	9.95693	0.0347998	0.349503	COM-Lemon Peel Powder
13.013	12.987	11.9166	12.6389	0.625653	4.95023	H-UNT-12-11-20		Untreated
10.01	10.9453	10.9453	10.6335	0.539975	5.07804	H-UNT-1-12-21
10.9453	10.9453	10.9235	10.938	0.0125507	0.114743	H-UNT-1-22-21
11.0442	11.011	9.90099	10.6521	0.650656	6.10827	H-UNT-2-3-21
11.0331	10.9671	10.02	10.6734	0.566799	5.31038	HV-UNT-2-19-21
10.0402	10.9671	11	10.6691	0.544914	5.10741	V-UNT-3-5-21
23.0692	21.978	24.8016	23.2829	1.42386	6.11549	H-STEX-(130-1)-2-3-21		130 deg C
22.8175	23.8095	25.0501	23.8924	1.11862	4.68193	H-STEX-(130-2)-1-22-21
21.6323	19.9402	20.8748	20.8157	0.847579	4.07182	H-STEX-(130-4)-2-3-21
20.6287	18.0361	19.0572	19.2406	1.30601	6.78775	V-STEX-(130-8)-3-5-21
20.3095	18.9621	17.9462	19.0726	1.18553	6.21587	V-STEX-(150-1)-3-5-21		150 deg C
18.9432	19.8216	16.9154	18.5601	1.49049	8.03061	H-STEX-(150-2)-1-12-21
14	13	12.024	13.008	0.988	7.59532	H-STEX-(150-4)-12-11-20
14.014	13.013	13	13.3423	0.581721	4.35996	HV-STEX-(150-8)-2-19-21
11.7647	11.0331	11.9522	11.5833	0.485649	4.19265	H-STEX-(170-1)-12-11-20		170 deg C
12.9096	12.0361	12.9353	12.627	0.511907	4.05406	HV-STEX-(170-2)-2-19-21
15.984	13.8751	15.015	14.9581	1.0556	7.05706	H-STEX-(170-4)-1-22-21
19.6078	19.019	17.982	18.8696	0.823144	4.36227	H-STEX-(170-8)-1-12-21

## Sheet: Water Retention Capacity
	WRC -- Water Retention Capacity			Fresh-Dry/Dry = WRC g/g		Dried 70°C 5-7 nights
		Dry sample g	Wet Pellet+ tube g	Dry Pellet + tube g	Tare g	Wet Pellet g	Dry Pellet g		WRC g/g	Ave	SD	RSD	SAMPLE NAME
		1	22.8206	14.6079	13.8094	9.0112	0.7985		10.2852
		1	22.6313	14.5469	13.7661	8.8652	0.7808		10.354					Commercial
		1	23.0658	14.2936	13.435	9.6308	0.8586		10.2169	10.2853	0.0685658	0.666636	COM-Citrus Fiber
		1.0001	22.37	16.41	15.7646	6.6054	0.6454		9.23458
		1.0001	22.53	16.52	15.8701	6.6599	0.6499		9.24758
		1	22.43	16.48	15.8309	6.5991	0.6491		9.16654	9.21623	0.0435242	0.472256	COM-Orange Peel Powder
		1.0003	23.08	16.69	16.044	7.036	0.646		9.89164
		1.0003	23	16.66	15.9958	7.0042	0.6642		9.54532
		1.0003	23.23	16.72	16.0746	7.1554	0.6454		10.0868	9.84124	0.274221	2.78645	COM-Lemon Peel Powder
		1	21.1152	14.2077	13.6316	7.4836	0.5761		11.9901
		1	21.1423	14.3561	13.793	7.3493	0.5631		12.0515					Untreated
		1	21.0554	14.0085	13.4255	7.6299	0.583		12.0873	12.043	0.0491587	0.408194	H-UNT-12-11-20
		1	20.2496	14.3883	13.8097	6.4399	0.5786		10.1301
		1	20.2348	14.0608	13.4655	6.7693	0.5953		10.3712
		1	20.295	14.0208	13.4191	6.8759	0.6017		10.4275	10.3096	0.157948	1.53204	H-UNT-1-12-21
		1	20.1222	14.3629	13.7952	6.327	0.5677		10.145
		1	19.7647	14.1973	13.6496	6.1151	0.5477		10.1651
		1	20.0479	14.0863	13.516	6.5319	0.5703		10.4534	10.2545	0.172593	1.6831	H-UNT-1-22-21
		1	19.3388	14.1619	13.6103	5.7285	0.5516		9.38524
		1	19.2286	13.9501	13.4006	5.828	0.5495		9.60601
		1	19.1152	13.9573	13.4098	5.7054	0.5475		9.42082	9.47069	0.118529	1.25154	H-UNT-2-3-21
		1	20.1377	14.51	13.9156	6.2221	0.5944		9.46787
		1	20.3782	14.4509	13.8302	6.548	0.6207		9.54938
		1	20.1244	14.0327	13.4083	6.7161	0.6244		9.75609	9.59111	0.148572	1.54906	HV-UNT-2-19-21
		1	20.1433	14.2216	13.6273	6.516	0.5943		9.96416
		1	20.0049	13.9674	13.3712	6.6337	0.5962		10.1266
		1	20.2321	14.2611	13.6609	6.5712	0.6002		9.94835	10.013	0.0986862	0.985576	V-UNT-3-5-21
		1	22.6087	14.0748	13.3928	9.2159	0.682		12.513
		1	22.5865	14.1375	13.4658	9.1207	0.6717		12.5785					130 deg C
		1	22.9752	14.3289	13.6499	9.3253	0.679		12.7339	12.6085	0.113418	0.899537	H-STEX-(130-1)-2-3-21
		1	24.0751	14.4498	13.7655	10.3096	0.6843		14.0659
		1	23.0477	14.3147	13.6599	9.3878	0.6548		13.3369
		1	23.8812	14.4516	13.7741	10.1071	0.6775		13.9182	13.7737	0.385403	2.79811	H-STEX-(130-2)-1-22-21
		1	21.9611	14.3893	13.7891	8.172	0.6002		12.6155
		1	21.787	14.3979	13.7952	7.9918	0.6027		12.26
		1	21.1752	14.264	13.6565	7.5187	0.6075		11.3765	12.084	0.63798	5.27956	H-STEX-(130-4)-2-3-21
		1	21.8364	14.2187	13.6469	8.1895	0.5718		13.3223
		1	21.0516	14.2097	13.6455	7.4061	0.5642		12.1267
		1	21.2279	14.3489	13.8188	7.4091	0.5301		12.9768	12.8086	0.615282	4.80366	V-STEX-(130-8)-3-5-21
		1	21.9569	14.2309	13.6455	8.3114	0.5854		13.1978
		1	21.0557	14.347	13.7884	7.2673	0.5586		12.0098					150 deg C
		1	21.5109	14.2318	13.6513	7.8596	0.5805		12.5394	12.5823	0.595149	4.73003	V-STEX-(150-1)-3-5-21
		1	21.2769	14.373	13.812	7.4649	0.561		12.3064
		1	21.3747	14.2292	13.6478	7.7269	0.5814		12.2902
		1	22.0083	14.3466	13.7641	8.2442	0.5825		13.1531	12.5832	0.493611	3.92277	H-STEX-(150-2)-1-12-21
		1	21.4893	14.27	13.6602	7.8291	0.6098		11.8388
		1	20.2988	14.3478	13.7874	6.5114	0.5604		10.6192
		1	20.2599	14.3613	13.8058	6.4541	0.5555		10.6185	11.0255	0.704326	6.38815	H-STEX-(150-4)-12-11-20
		1	22.186	14.3449	13.7655	8.4205	0.5794		13.5331
		1	22.6943	14.265	13.6599	9.0344	0.6051		13.9304
		1	22.9988	14.3977	13.7741	9.2247	0.6236		13.7927	13.7521	0.201729	1.4669	HV-STEX-(150-8)-2-19-21
		1	21.8857	14.4072	13.7891	8.0966	0.6181		12.0992
		1	22.018	14.4153	13.7952	8.2228	0.6201		12.2604					170 deg C
		1	21.4724	14.2554	13.6565	7.8159	0.5989		12.0504	12.1367	0.109917	0.905658	H-STEX-(170-1)-12-11-20
		1	23.1476	14.2617	13.6469	9.5007	0.6148		14.4533
		1	22.6939	14.2464	13.6455	9.0484	0.6009		14.0581
		1	23.0363	14.4297	13.8188	9.2175	0.6109		14.0884	14.1999	0.219963	1.54904	HV-STEX-(170-2)-2-19-21
		1	24.9955	14.3751	13.6455	11.35	0.7296		14.5565
		1	25.1026	14.5055	13.7884	11.3142	0.7171		14.7777
		1	24.5962	14.3505	13.6513	10.9449	0.6992		14.6535	14.6625	0.110903	0.756368	H-STEX-(170-4)-1-22-21
		1	27.7875	14.5904	13.812	13.9755	0.7784		16.9541
		1	27.2913	14.4111	13.6478	13.6435	0.7633		16.8744
		1	28.1587	14.566	13.7641	14.3946	0.8019		16.9506	16.9264	0.0450767	0.266311	H-STEX-(170-8)-1-12-21

## Sheet: Oil Holding Capacity
	OHC (g/g) = weight of oil adsorbed/ weight of sample			Lei Wang, H. X. (2015). Physicochemical characterization of five types of citrus dietary fibers. Biocatalysis and Agricultural Biotechnology 4, 250-258.
	0.5 g/ 5 mL oil -- 4°C 1hr-- centrifuge 4°C 7000g 30min
Dry sample g	Wet Pellet+ tube+cap g	Tare tube+cap g	Wet Pellet g	Oil g		OHC g/g	Ave	SD	RSD	SAMPLE NAME
0.5007	17.8455	16.3681	1.4774	0.9767		1.95067
0.5009	17.6836	16.2152	1.4684	0.9675		1.93152					Commercial
0.4994	17.8694	16.3614	1.508	1.0086		2.01962	1.96727	0.0463374	2.35542	COM-Citrus Fiber
0.5007	17.5568	16.2987	1.2581	0.7574		1.51268
0.5001	17.5856	16.2292	1.3564	0.8563		1.71226
0.5012	17.6383	16.3179	1.3204	0.8192		1.63448	1.61981	0.100593	6.21021	COM-Orange Peel Powder
0.5008	19.5044	18.1648	1.3396	0.8388		1.67492
0.5002	17.733	16.3753	1.3577	0.8575		1.71431
0.4993	17.5067	16.2065	1.3002	0.8009		1.60405	1.66443	0.0558782	3.35721	COM-Lemon Peel Powder
0.4995	18.0911	16.36	1.7311	1.2316		2.46567
0.5008	18.1673	16.3482	1.8191	1.3183		2.63239					Untreated
0.5008	17.8414	16.0145	1.8269	1.3261		2.64796	2.58201	0.101054	3.91378	H-UNT-12-11-20
0.5004	17.8455	16.2337	1.6118	1.1114		2.22102
0.5025	18.0367	16.3756	1.6611	1.1586		2.30567
0.4999	17.9769	16.2319	1.745	1.2451		2.4907	2.33913	0.137916	5.89603	H-UNT-1-12-21
0.5016	18.164	16.3922	1.7718	1.2702		2.5323
0.4988	17.999	16.22	1.779	1.2802		2.56656
0.502	18.1037	16.3296	1.7741	1.2721		2.53406	2.54431	0.0192919	0.758239	H-UNT-1-22-21
0.4987	17.897	16.2266	1.6704	1.1717		2.34951
0.5016	18.0733	16.3417	1.7316	1.23		2.45215
0.5009	18.1568	16.3822	1.7746	1.2737		2.54282	2.44816	0.0967189	3.95067	H-UNT-2-3-21
0.5	18.1704	16.3624	1.808	1.308		2.616
0.5007	18.1484	16.3535	1.7949	1.2942		2.58478
0.4995	17.8274	16.0154	1.812	1.3125		2.62763	2.60947	0.0221571	0.849103	HV-UNT-2-19-21
0.5005	18.0728	16.215	1.8578	1.3573		2.71189
0.5017	18.2169	16.3914	1.8255	1.3238		2.63863
0.5004	17.8975	16.0027	1.8948	1.3944		2.78657	2.71236	0.0739722	2.72722	V-UNT-3-5-21
0.5002	17.8837	16.2152	1.6685	1.1683		2.33567
0.5003	18.0125	16.3924	1.6201	1.1198		2.23826					130 deg C
0.4994	17.6157	16.0027	1.613	1.1136		2.22988	2.26793	0.0588079	2.59302	H-STEX-(130-1)-2-3-21
0.4995	17.9789	16.3614	1.6175	1.118		2.23824
0.5004	17.7668	16.0379	1.7289	1.2285		2.45504
0.5	17.7592	15.9907	1.7685	1.2685		2.537	2.41009	0.154369	6.40509	H-STEX-(130-2)-1-22-21
0.5002	17.8966	16.3604	1.5362	1.036		2.07117
0.5001	17.6804	16.2346	1.4458	0.9457		1.89102
0.501	19.3523	17.8852	1.4671	0.9661		1.92834	1.96351	0.0950848	4.84259	H-STEX-(130-4)-2-3-21
0.4997	17.7019	16.1809	1.521	1.0213		2.04383
0.4995	17.4947	15.954	1.5407	1.0412		2.08448
0.499	17.5154	15.9716	1.5438	1.0448		2.09379	2.07403	0.0265699	1.28108	V-STEX-(130-8)-3-5-21
0.5016	18.01	16.4873	1.5227	1.0211		2.03569
0.4994	19.7556	18.1847	1.5709	1.0715		2.14557					150 deg C
0.502	17.6633	15.9994	1.6639	1.1619		2.31454	2.16527	0.140467	6.48729	V-STEX-(150-1)-3-5-21
0.4997	17.7297	16.2047	1.525	1.0253		2.05183
0.5	17.4393	15.8887	1.5506	1.0506		2.1012
0.4996	17.8589	16.2221	1.6368	1.1372		2.27622	2.14308	0.117913	5.50201	H-STEX-(150-2)-1-12-21
0.5009	17.5394	15.9975	1.5419	1.041		2.07826
0.5006	17.5294	15.9855	1.5439	1.0433		2.0841
0.5008	17.7932	16.2005	1.5927	1.0919		2.18031	2.11422	0.0573086	2.71062	H-STEX-(150-4)-12-11-20
0.4992	17.7442	16.3001	1.4441	0.9449		1.89283
0.5002	17.8054	16.2323	1.5731	1.0729		2.14494
0.5022	17.8414	16.3162	1.5252	1.023		2.03704	2.02494	0.126492	6.2467	HV-STEX-(150-8)-2-19-21
0.5004	19.5283	18.1622	1.3661	0.8657		1.73002
0.5011	17.6815	16.3757	1.3058	0.8047		1.60587					170 deg C
0.4991	17.5848	16.2109	1.3739	0.8748		1.75275	1.69621	0.0790633	4.66117	H-STEX-(170-1)-12-11-20
0.4997	17.8925	16.1989	1.6936	1.1939		2.38923
0.4996	17.8946	16.2288	1.6658	1.1662		2.33427
0.5001	18.1278	16.4027	1.7251	1.225		2.44951	2.391	0.0576417	2.41078	HV-STEX-(170-2)-2-19-21
0.4996	18.0286	16.2355	1.7931	1.2935		2.58907
0.5006	18.1054	16.3759	1.7295	1.2289		2.45485
0.5003	17.9836	16.2322	1.7514	1.2511		2.5007	2.51488	0.0682222	2.71275	H-STEX-(170-4)-1-22-21
0.4987	17.856	16.2188	1.6372	1.1385		2.28294
0.4995	18.0923	16.3959	1.6964	1.1969		2.3962
0.5007	17.628	16.0079	1.6201	1.1194		2.23567	2.30493	0.0824931	3.57898	H-STEX-(170-8)-1-12-21

## Sheet: Soluble Sugar
		Treatment	Rhamnose	SD	RSD	Arabinose	SD2	RSD3	Galactose	SD4	RSD5	Glucose	SD6	RSD7	Xylose	SD8	RSD9	Fructose	SD10	RSD11	Sucrose	SD12	RSD13	Cellobiose	SD14	RSD15	Galacturonic Acid	SD16	RSD17	Total			R,A,G,Gl,X,F,S,C total	St Dev	RSD
Commercial	COM-Citrus Fiber	CitraFiber	0	0	#DIV/0!	0.00483725	7.39683e-05	1.52914	0.00247921	0.00024044	9.69824	0.0145242	0.00021791	1.50033	0	0	#DIV/0!	0.00662887	0.000211693	3.1935	0.0148048	0.00102832	6.94583	0	0	#DIV/0!	0	0	#DIV/0!	0.0432743	COM-Citrus Fiber	Commercial	0.0432743	0.000642118	1.48383
	COM-Orange Peel Powder	CE OR	0	0	#DIV/0!	0	0	#DIV/0!	0.022873	0.000846037	3.69885	1.26257	0.0388037	3.07339	0	0	#DIV/0!	1.47485	0.0502643	3.4081	1.36394	0.0458869	3.36429	0	0	#DIV/0!	0	0	#DIV/0!	4.12423	COM-Orange Peel Powder		4.12423	0.13563	3.28862
	COM-Lemon Peel Powder	CE LN	0	0	#DIV/0!	0	0	#DIV/0!	0.0145797	0.000599807	4.114	0.975468	0.0471585	4.83445	0	0	#DIV/0!	0.737952	0.0424265	5.74923	0.553678	0.0360365	6.50856	0	0	#DIV/0!	0	0	#DIV/0!	2.28168	COM-Lemon Peel Powder		2.28168	0.125732	5.5105
Untreated	H-UNT-12-11-20	12/11/20 Raw	0	0	#DIV/0!	0	0	#DIV/0!	0.0871832	0.00336472	3.85937	5.3729	0.0295709	0.55037	0	0	#DIV/0!	5.03448	0.0281775	0.559691	9.09068	0.395699	4.3528	0	0	#DIV/0!	0	0	#DIV/0!	19.5852	H-UNT-12-11-20	Untreated	19.5852	0.417357	2.13098
	H-UNT-1-12-21	1/12/21 Raw	0	0	#DIV/0!	0	0	#DIV/0!	0.124102	0.00288466	2.32443	6.31084	0.30121	4.77289	0	0	#DIV/0!	6.18605	0.35593	5.75374	6.30338	0.1938	3.07454	0	0	#DIV/0!	0	0	#DIV/0!	18.9244	H-UNT-1-12-21		18.9244	0.835478	4.41482
	H-UNT-1-22-21	1/22/21 Raw	0	0	#DIV/0!	0	0	#DIV/0!	0.111859	0.00733779	6.55983	6.88539	0.269799	3.91843	0	0	#DIV/0!	7.37185	0.161007	2.18408	5.79872	0.355146	6.12455	0	0	#DIV/0!	0	0	#DIV/0!	20.1678	H-UNT-1-22-21		20.1678	0.782321	3.87906
	H-UNT-2-3-21	2/3/21 Raw	0	0	#DIV/0!	0	0	#DIV/0!	0.107078	0.00430493	4.02038	7.24459	0.289595	3.9974	0	0	#DIV/0!	7.21221	0.256826	3.56099	7.76136	0.047832	0.616283	0	0	#DIV/0!	0	0	#DIV/0!	22.3252	H-UNT-2-3-21		22.3252	0.492208	2.20471
	HV-UNT-2-19-21	2/19/21 Raw	0	0	#DIV/0!	0	0	#DIV/0!	0.105485	0.00224249	2.12589	5.13789	0.180946	3.52179	0	0	#DIV/0!	5.27893	0.195658	3.7064	5.12993	0.209085	4.07579	0	0	#DIV/0!	0	0	#DIV/0!	15.6522	HV-UNT-2-19-21		15.6522	0.562257	3.59218
	V-UNT-3-5-21	3/5/21 Raw	0	0	#DIV/0!	0	0	#DIV/0!	0.119883	0.00152896	1.27538	6.47097	0.0628407	0.971117	0	0	#DIV/0!	5.35079	0.0188371	0.352043	9.17757	0.199559	2.17442	0	0	#DIV/0!	0	0	#DIV/0!	21.1192	V-UNT-3-5-21		21.1192	0.270525	1.28094
130 deg C	H-STEX-(130-1)-2-3-21	130°C 1min	0	0	#DIV/0!	0	0	#DIV/0!	0.0368484	0.00160696	4.361	2.17005	0.120732	5.56357	0	0	#DIV/0!	2.20143	0.128786	5.85013	2.86399	0.137246	4.79211	0	0	#DIV/0!	0	0	#DIV/0!	7.27231	H-STEX-(130-1)-2-3-21	130 deg C	7.27231	0.379284	5.21546
	H-STEX-(130-2)-1-22-21	130°C 2min	0	0	#DIV/0!	0	0	#DIV/0!	0.0405568	0.00246787	6.08497	1.85816	0.00529459	0.284938	0	0	#DIV/0!	1.52979	0.0258709	1.69114	1.40234	0.0296209	2.11225	0	0	#DIV/0!	0	0	#DIV/0!	4.83084	H-STEX-(130-2)-1-22-21		4.83084	0.0527014	1.09094
	H-STEX-(130-4)-2-3-21	130°C 4min	0	0	#DIV/0!	0	0	#DIV/0!	0.0378879	0.00149585	3.94808	2.49622	0.0635414	2.5455	0	0	#DIV/0!	2.49983	0.0356521	1.42618	2.54174	0.0770406	3.03102	0	0	#DIV/0!	0	0	#DIV/0!	7.57568	H-STEX-(130-4)-2-3-21		7.57568	0.174401	2.30212
	V-STEX-(130-8)-3-5-21	130°C 8min	0	0	#DIV/0!	0	0	#DIV/0!	0.0338347	0.00220149	6.50662	1.77704	0.0534772	3.00935	0	0	#DIV/0!	1.50175	0.0464396	3.09237	1.77754	0.0308076	1.73316	0	0	#DIV/0!	0	0	#DIV/0!	5.09016	V-STEX-(130-8)-3-5-21		5.09016	0.126248	2.48023
150 deg C	V-STEX-(150-1)-3-5-21	150°C 1min	0	0	#DIV/0!	0	0	#DIV/0!	0.0427867	0.000982246	2.29568	2.05178	0.0266001	1.29644	0	0	#DIV/0!	1.62532	0.0396064	2.43684	2.01432	0.0343277	1.70419	0	0	#DIV/0!	0	0	#DIV/0!	5.7342	V-STEX-(150-1)-3-5-21	150 deg C	5.7342	0.0978771	1.7069
	H-STEX-(150-2)-1-12-21	150°C 2min	0	0	#DIV/0!	0	0	#DIV/0!	0.0428548	0.00357263	8.3366	1.73046	0.0748017	4.32264	0	0	#DIV/0!	1.36315	0.0539509	3.95782	0.925956	0.0344866	3.72443	0	0	#DIV/0!	0	0	#DIV/0!	4.06242	H-STEX-(150-2)-1-12-21		4.06242	0.165703	4.07893
	H-STEX-(150-4)-12-11-20	150°C 4min	0	0	#DIV/0!	0	0	#DIV/0!	0.0496605	0.00106906	2.15274	1.95404	0.0320141	1.63835	0	0	#DIV/0!	1.54307	0.0509579	3.30236	1.89554	0.0432889	2.28372	0	0	#DIV/0!	0	0	#DIV/0!	5.44232	H-STEX-(150-4)-12-11-20		5.44232	0.0397257	0.72994
	HV-STEX-(150-8)-2-19-21	150°C 8min	0	0	#DIV/0!	0.0358498	0.00268999	7.50351	0.053232	0.00394401	7.40909	1.87628	0.0808244	4.30769	0	0	#DIV/0!	1.44973	0.0879696	6.068	0.512945	0.0192431	3.7515	0	0	#DIV/0!	0	0	#DIV/0!	3.92804	HV-STEX-(150-8)-2-19-21		3.92804	0.194185	4.94357
170 deg C	H-STEX-(170-1)-12-11-20	170°C 1min	0	0	#DIV/0!	0	0	#DIV/0!	0.0417243	0.0014571	3.4922	2.19436	0.0963143	4.38917	0	0	#DIV/0!	1.8075	0.093527	5.17439	2.08316	0.128147	6.15158	0	0	#DIV/0!	0	0	#DIV/0!	6.12674	H-STEX-(170-1)-12-11-20	170 deg C	6.12674	0.318316	5.19552
	HV-STEX-(170-2)-2-19-21	170°C 2min	0	0	#DIV/0!	0.0287797	0.00061447	2.13508	0.0442175	0.000744005	1.6826	1.63358	0.113143	6.92606	0	0	#DIV/0!	1.21235	0.114441	9.43967	0.626618	0.0317194	5.062	0	0	#DIV/0!	0	0	#DIV/0!	3.54554	HV-STEX-(170-2)-2-19-21		3.54554	0.256895	7.24557
	H-STEX-(170-4)-1-22-21	170°C 4min	0	0	#DIV/0!	0.0253303	0.00201315	7.94758	0.0601945	0.00272325	4.52409	1.735	0.0400308	2.30726	0	0	#DIV/0!	0.72299	0.0167894	2.32222	0	0	#DIV/0!	0	0	#DIV/0!	0	0	#DIV/0!	2.54351	H-STEX-(170-4)-1-22-21		2.54351	0.0220846	0.868273
	H-STEX-(170-8)-1-12-21	170°C 8min	0	0	#DIV/0!	0.0517739	0.00452016	8.73058	0.0974866	0.0072239	7.41014	0.939404	0.0354772	3.77657	0	0	#DIV/0!	0	0	#DIV/0!	0	0	#DIV/0!	0	0	#DIV/0!	0	0	#DIV/0!	1.08866	H-STEX-(170-8)-1-12-21		1.08866	0.027932	2.56572
		3:1 CitraFiber/CE-OR	0	0	#DIV/0!	0.00337617	5.32892e-05	1.57839	0.00669743	0.000100011	1.49328	0.351065	0.00244774	0.697231	0	0	#DIV/0!	0.421045	0.0020694	0.491492	0.384257	0.00465745	1.21207	0	0	#DIV/0!	0	0	#DIV/0!	1.16644	3:1 CitraFiber/CE-OR		1.16644	0.00625159	0.535954

## Sheet: Soluble Sugar Chromatograms
Soluble Sugars Fiber Samples
12-11-20-Raw-WE-R1-50x-Rep1
						Dry Weight
Name	RT	Area	Amount	Peak Area Percent	Unit	22.2
2-Dog	7.22	1864.7	0.5	21.57	%w/v	% Dry Wt
Rhamnose			0		%w/v	0
Arabinose			0		%w/v	0
Galactose	13.4	54.0163	0.018494	0.62	%w/v	0.0833063
Glucose	14.45	3130.76	1.18599	36.21	%w/v	5.34229
Xylose			0		%w/v	0
Fructose	17.38	2004.37	1.12072	23.18	%w/v	5.04829
Sucrose	22.12	1591.35	1.93534	18.41	%w/v	8.71774
Cellobiose			0		%w/v	0
Galacturonic Acid			0		%w/v	0
			Sum	100
12-11-20-Raw-WE-R1-50x-Rep2
						Dry Weight
Name	RT	Area	Amount	Peak Area Percent	Unit	22.2
2-Dog	7.22	1847.64	0.5	21.57	%w/v	% Dry Wt
Rhamnose			0		%w/v	0
Arabinose			0		%w/v	0
Galactose	13.4	52.9166	0.018285	0.62	%w/v	0.0823649
Glucose	14.46	3101.54	1.18576	36.2	%w/v	5.34128
Xylose			0		%w/v	0
Fructose	17.42	1992.59	1.12442	23.26	%w/v	5.06497
Sucrose	22.18	1572.26	1.92977	18.35	%w/v	8.69266
Cellobiose			0		%w/v	0
Galacturonic Acid			0		%w/v	0
			Sum	100
12-11-20-Raw-WE-R2-50x-Rep1
						Dry Weight
Name	RT	Area	Amount	Peak Area Percent	Unit	22.2
2-Dog	7.22	1856.85	0.5	21.37	%w/v	% Dry Wt
Rhamnose			0		%w/v	0
Arabinose			0		%w/v	0
Galactose	13.39	57.686	0.019834	0.66	%w/v	0.0893423
Glucose	14.45	3152.03	1.19909	36.28	%w/v	5.40131
Xylose			0		%w/v	0
Fructose	17.4	1977.65	1.11046	22.76	%w/v	5.00206
Sucrose	22.16	1644.78	2.00877	18.93	%w/v	9.04852
Cellobiose			0		%w/v	0
Galacturonic Acid			0		%w/v	0
			Sum	100
12-11-20-Raw-WE-R2-50x-Rep2
						Dry Weight
Name	RT	Area	Amount	Peak Area Percent	Unit	22.2
2-Dog	7.23	1864.84	0.5	21.37	%w/v	% Dry Wt
Rhamnose			0		%w/v	0
Arabinose			0		%w/v	0
Galactose	13.43	55.3998	0.018966	0.63	%w/v	0.0854324
Glucose	14.48	3151.17	1.19362	36.11	%w/v	5.37668
Xylose			0		%w/v	0
Fructose	17.47	1981.79	1.10801	22.71	%w/v	4.99103
Sucrose	22.22	1673.05	2.03453	19.17	%w/v	9.16455
Cellobiose			0		%w/v	0
Galacturonic Acid			0		%w/v	0
			Sum	100
12-11-20-Raw-WE-R3-50x-Rep1
						Dry Weight
Name	RT	Area	Amount	Peak Area Percent	Unit	22.2
2-Dog	7.24	1843.04	0.5	21.16	%w/v	% Dry Wt
Rhamnose			0		%w/v	0
Arabinose			0		%w/v	0
Galactose	13.43	56.9744	0.019736	0.65	%w/v	0.0889009
Glucose	14.5	3113.41	1.19327	35.74	%w/v	5.37511
Xylose			0		%w/v	0
Fructose	17.42	1982.97	1.12178	22.76	%w/v	5.05308
Sucrose	22.22	1715.05	2.11028	19.69	%w/v	9.50577
Cellobiose			0		%w/v	0
Galacturonic Acid			0		%w/v	0
			Sum	100
12-11-20-Raw-WE-R3-50x-Rep2
						Dry Weight
Name	RT	Area	Amount	Peak Area Percent	Unit	22.2
2-Dog	7.24	1861.91	0.5	21.06	%w/v	% Dry Wt
Rhamnose			0		%w/v	0
Arabinose			0		%w/v	0
Galactose	13.42	49.8673	0.017099	0.56	%w/v	0.0770225
Glucose	14.49	3153.27	1.1963	35.66	%w/v	5.38874
Xylose			0		%w/v	0
Fructose	17.43	1998.43	1.11907	22.6	%w/v	5.04086
Sucrose	22.23	1778.87	2.16662	20.12	%w/v	9.75954
Cellobiose			0		%w/v	0
Galacturonic Acid			0		%w/v	0
			Sum	100
1-12-21-Raw-WE-R1-50x-Rep1
						Dry Weight
Name	RT	Area	Amount	Peak Area Percent	Unit	19.65
2-Dog	7.24	1825.43	0.5	23.18	%w/v	% Dry Wt
Rhamnose			0		%w/v	0
Arabinose			0		%w/v	0
Galactose	13.44	67.8706	0.023737	0.86	%w/v	0.120799
Glucose	14.5	3028.36	1.17187	38.45	%w/v	5.96373
Xylose			0		%w/v	0
Fructose	17.38	1986.93	1.13487	25.23	%w/v	5.77541
Sucrose	22.24	966.783	1.20105	12.28	%w/v	6.11223
Cellobiose			0		%w/v	0
Galacturonic Acid			0		%w/v	0
			Sum	100
1-12-21-Raw-WE-R1-50x-Rep2
						Dry Weight
Name	RT	Area	Amount	Peak Area Percent	Unit	19.65
2-Dog	7.24	1824.15	0.5	22.62	%w/v	% Dry Wt
Rhamnose			0		%w/v	0
Arabinose			0		%w/v	0
Galactose	13.43	65.37	0.022879	0.81	%w/v	0.116433
Glucose	14.48	3040.58	1.17743	37.71	%w/v	5.99201
Xylose			0		%w/v	0
Fructose	17.38	2170.06	1.24034	26.91	%w/v	6.31214
Sucrose	22.22	963.506	1.19782	11.95	%w/v	6.0958
Cellobiose			0		%w/v	0
Galacturonic Acid			0		%w/v	0
			Sum	100
1-12-21-Raw-WE-R2-50x-Rep1
						Dry Weight
Name	RT	Area	Amount	Peak Area Percent	Unit	19.65
2-Dog	7.23	1802.71	0.5	21.65	%w/v	% Dry Wt
Rhamnose			0		%w/v	0
Arabinose			0		%w/v	0
Galactose	13.42	69.5655	0.024637	0.84	%w/v	0.125379
Glucose	14.48	3261.33	1.27793	39.17	%w/v	6.50344
Xylose			0		%w/v	0
Fructose	17.38	2176.49	1.2588	26.14	%w/v	6.40612
Sucrose	22.22	1015.28	1.2772	12.2	%w/v	6.49973
Cellobiose			0		%w/v	0
Galacturonic Acid			0		%w/v	0
			Sum	100
1-12-21-Raw-WE-R2-50x-Rep2
						Dry Weight
Name	RT	Area	Amount	Peak Area Percent	Unit	19.65
2-Dog	7.22	1812.64	0.5	21.79	%w/v	% Dry Wt
Rhamnose			0		%w/v	0
Arabinose			0		%w/v	0
Galactose	13.41	72.4578	0.02552	0.87	%w/v	0.129873
Glucose	14.46	3264.21	1.27205	39.24	%w/v	6.47355
Xylose			0		%w/v	0
Fructose	17.39	2176.18	1.25173	26.16	%w/v	6.37013
Sucrose	22.2	993.518	1.24298	11.94	%w/v	6.32558
Cellobiose			0		%w/v	0
Galacturonic Acid			0		%w/v	0
			Sum	100
1-12-21-Raw-WE-R3-50x-Rep1
						Dry Weight
Name	RT	Area	Amount	Peak Area Percent	Unit	19.65
2-Dog	7.21	1850.12	0.5	21.81	%w/v	% Dry Wt
Rhamnose			0		%w/v	0
Arabinose			0		%w/v	0
Galactose	13.39	71.8224	0.024784	0.85	%w/v	0.126127
Glucose	14.44	3327.48	1.27044	39.23	%w/v	6.46535
Xylose			0		%w/v	0
Fructose	17.38	2223.43	1.25301	26.21	%w/v	6.37663
Sucrose	22.18	1009.67	1.23759	11.9	%w/v	6.29819
Cellobiose			0		%w/v	0
Galacturonic Acid			0		%w/v	0
			Sum	100
1-12-21-Raw-WE-R3-50x-Rep2
						Dry Weight
Name	RT	Area	Amount	Peak Area Percent	Unit	19.65
2-Dog	7.21	1870.77	0.5	21.6	%w/v	% Dry Wt
Rhamnose			0		%w/v	0
Arabinose			0		%w/v	0
Galactose	13.38	72.7671	0.024833	0.84	%w/v	0.126377
Glucose	14.43	3383.47	1.27755	39.07	%w/v	6.50155
Xylose			0		%w/v	0
Fructose	17.37	2294.69	1.27888	26.5	%w/v	6.50832
Sucrose	22.17	1038.5	1.25888	11.99	%w/v	6.40652
Cellobiose			0		%w/v	0
Galacturonic Acid			0		%w/v	0
			Sum	100
1-22-21-Raw-WE-R1-50x-Rep1
						Dry Weight
Name	RT	Area	Amount	Peak Area Percent	Unit	17.55
2-Dog	7.29	1695.75	0.5	23.25	%w/v	% Dry Wt
Rhamnose			0		%w/v	0
Arabinose			0		%w/v	0
Galactose	13.44	54.7595	0.020435	0.75	%w/v	0.116439
Glucose	14.52	2830.25	1.17197	38.81	%w/v	6.67791
Xylose			0		%w/v	0
Fructose	17.2	2078.2	1.28201	28.5	%w/v	7.30492
Sucrose	22.12	633.865	0.979626	8.69	%w/v	5.58191
Cellobiose			0		%w/v	0
Galacturonic Acid			0		%w/v	0
			Sum	100
1-22-21-Raw-WE-R1-50x-Rep2
						Dry Weight
Name	RT	Area	Amount	Peak Area Percent	Unit	17.55
2-Dog	7.3	1657.18	0.5	23.29	%w/v	% Dry Wt
Rhamnose			0		%w/v	0
Arabinose			0		%w/v	0
Galactose	13.45	53.8463	0.020561	0.76	%w/v	0.117157
Glucose	14.54	2792.24	1.18315	39.24	%w/v	6.7416
Xylose			0		%w/v	0
Fructose	17.18	2012.06	1.2701	28.27	%w/v	7.23704
Sucrose	22.12	600.901	0.950299	8.44	%w/v	5.41481
Cellobiose			0		%w/v	0
Galacturonic Acid			0		%w/v	0
			Sum	100
1-22-21-Raw-WE-R2-50x-Rep1
						Dry Weight
Name	RT	Area	Amount	Peak Area Percent	Unit	17.55
2-Dog	7.3	1680.66	0.5	23.16	%w/v	% Dry Wt
Rhamnose			0		%w/v	0
Arabinose			0		%w/v	0
Galactose	13.43	48.1938	0.018146	0.66	%w/v	0.103396
Glucose	14.53	2851.24	1.19127	39.29	%w/v	6.78786
Xylose			0		%w/v	0
Fructose	17.17	2045.66	1.27327	28.19	%w/v	7.25511
Sucrose	22.1	630.897	0.983796	8.69	%w/v	5.60568
Cellobiose			0		%w/v	0
Galacturonic Acid			0		%w/v	0
			Sum	100
1-22-21-Raw-WE-R2-50x-Rep2
						Dry Weight
Name	RT	Area	Amount	Peak Area Percent	Unit	17.55
2-Dog	7.3	1661.4	0.5	22.99	%w/v	% Dry Wt
Rhamnose			0		%w/v	0
Arabinose			0		%w/v	0
Galactose	13.43	51.6833	0.019685	0.72	%w/v	0.112165
Glucose	14.52	2856.65	1.20736	39.53	%w/v	6.87956
Xylose			0		%w/v	0
Fructose	17.21	2011.31	1.2664	27.83	%w/v	7.21595
Sucrose	22.14	645.159	1.0177	8.93	%w/v	5.79884
Cellobiose			0		%w/v	0
Galacturonic Acid			0		%w/v	0
			Sum	100
1-22-21-Raw-WE-R3-50x-Rep1
						Dry Weight
Name	RT	Area	Amount	Peak Area Percent	Unit	17.55
2-Dog	7.3	1722.96	0.5	22.16	%w/v	% Dry Wt
Rhamnose			0		%w/v	0
Arabinose			0		%w/v	0
Galactose	13.44	55.3071	0.020313	0.71	%w/v	0.115744
Glucose	14.52	3096.35	1.26191	39.82	%w/v	7.19039
Xylose			0		%w/v	0
Fructose	17.14	2183.99	1.326	28.09	%w/v	7.55553
Sucrose	22.1	716.341	1.08961	9.21	%w/v	6.20858
Cellobiose			0		%w/v	0
Galacturonic Acid			0		%w/v	0
			Sum	100
1-22-21-Raw-WE-R3-50x-Rep2
						Dry Weight
Name	RT	Area	Amount	Peak Area Percent	Unit	17.55
2-Dog	7.3	1698.2	0.5	22	%w/v	% Dry Wt
Rhamnose			0		%w/v	0
Arabinose			0		%w/v	0
Galactose	13.41	55.841	0.020808	0.72	%w/v	0.118564
Glucose	14.54	3058.85	1.26481	39.63	%w/v	7.20687
Xylose			0		%w/v	0
Fructose	17.14	2172.38	1.33818	28.15	%w/v	7.62494
Sucrose	22.11	732.951	1.13113	9.5	%w/v	6.44517
Cellobiose			0		%w/v	0
Galacturonic Acid			0		%w/v	0
			Sum	100
2-3-21-Raw-WE-R1-50x-Rep1
						Dry Weight
Name	RT	Area	Amount	Peak Area Percent	Unit	22.3
2-Dog	7.3	1685.09	0.5	17.56	%w/v	% Dry Wt
Rhamnose			0		%w/v	0
Arabinose			0		%w/v	0
Galactose	13.44	66.5349	0.024986	0.69	%w/v	0.112045
Glucose	14.53	4055.11	1.6898	42.26	%w/v	7.57756
Xylose			0		%w/v	0
Fructose	17.09	2684.29	1.66638	27.97	%w/v	7.47255
Sucrose	22.09	1105	1.71856	11.52	%w/v	7.70653
Cellobiose			0		%w/v	0
Galacturonic Acid			0		%w/v	0
			Sum	100
2-3-21-Raw-WE-R1-50x-Rep2
						Dry Weight
Name	RT	Area	Amount	Peak Area Percent	Unit	22.3
2-Dog	7.3	1704.97	0.5	17.39	%w/v	% Dry Wt
Rhamnose			0		%w/v	0
Arabinose			0		%w/v	0
Galactose	13.43	64.7518	0.024033	0.66	%w/v	0.107771
Glucose	14.52	4131.83	1.70169	42.15	%w/v	7.6309
Xylose			0		%w/v	0
Fructose	17.17	2728.86	1.67429	27.84	%w/v	7.50804
Sucrose	22.13	1172.27	1.80193	11.96	%w/v	8.08041
Cellobiose			0		%w/v	0
Galacturonic Acid			0		%w/v	0
			Sum	100
2-3-21-Raw-WE-R2-50x-Rep1
						Dry Weight
Name	RT	Area	Amount	Peak Area Percent	Unit	22.3
2-Dog	7.3	1718.69	0.5	18.44	%w/v	% Dry Wt
Rhamnose			0		%w/v	0
Arabinose			0		%w/v	0
Galactose	13.42	63.2489	0.023287	0.68	%w/v	0.104426
Glucose	14.51	3848.76	1.57246	41.29	%w/v	7.05138
Xylose			0		%w/v	0
Fructose	17.22	2549.68	1.55187	27.36	%w/v	6.95904
Sucrose	22.11	1139.9	1.73818	12.23	%w/v	7.79455
Cellobiose			0		%w/v	0
Galacturonic Acid			0		%w/v	0
			Sum	100
2-3-21-Raw-WE-R2-50x-Rep2
						Dry Weight
Name	RT	Area	Amount	Peak Area Percent	Unit	22.3
2-Dog	7.29	1721.5	0.5	18.38	%w/v	% Dry Wt
Rhamnose			0		%w/v	0
Arabinose			0		%w/v	0
Galactose	13.4	62.9616	0.023144	0.67	%w/v	0.103785
Glucose	14.49	3839.16	1.56597	41	%w/v	7.02229
Xylose			0		%w/v	0
Fructose	17.13	2598.64	1.57908	27.75	%w/v	7.08108
Sucrose	22.08	1142.62	1.73948	12.2	%w/v	7.80034
Cellobiose			0		%w/v	0
Galacturonic Acid			0		%w/v	0
			Sum	100
2-3-21-Raw-WE-R3-50x-Rep1
						Dry Weight
Name	RT	Area	Amount	Peak Area Percent	Unit	22.3
2-Dog	7.29	1739.51	0.5	18.21	%w/v	% Dry Wt
Rhamnose			0		%w/v	0
Arabinose			0		%w/v	0
Galactose	13.43	64.2189	0.023362	0.67	%w/v	0.104762
Glucose	14.5	3924.92	1.58438	41.09	%w/v	7.10483
Xylose			0		%w/v	0
Fructose	17.11	2671.79	1.60673	27.97	%w/v	7.20505
Sucrose	22.03	1152	1.73561	12.06	%w/v	7.783
Cellobiose			0		%w/v	0
Galacturonic Acid			0		%w/v	0
			Sum	100
2-3-21-Raw-WE-R3-50x-Rep2
						Dry Weight
Name	RT	Area	Amount	Peak Area Percent	Unit	22.3
2-Dog	7.28	1735.73	0.5	18.27	%w/v	% Dry Wt
Rhamnose			0		%w/v	0
Arabinose			0		%w/v	0
Galactose	13.4	65.9962	0.02406	0.69	%w/v	0.107892
Glucose	14.49	3910.01	1.5818	41.16	%w/v	7.09325
Xylose			0		%w/v	0
Fructose	17.08	2639.38	1.59069	27.78	%w/v	7.13316
Sucrose	21.99	1148.92	1.73473	12.09	%w/v	7.77906
Cellobiose			0		%w/v	0
Galacturonic Acid			0		%w/v	0
			Sum	100
2-19-21-Raw-WE-R1-50x-Rep1
						Dry Weight
Name	RT	Area	Amount	Peak Area Percent	Unit	22.25
2-Dog	7.2	2492.73	0.5	24.8	%w/v	% Dry Wt
Rhamnose			0		%w/v	0
Arabinose			0		%w/v	0
Galactose	13.37	88.0939	0.023797	0.88	%w/v	0.106953
Glucose	14.41	3742.77	1.12187	37.23	%w/v	5.04213
Xylose			0		%w/v	0
Fructose	17.39	2276.16	1.14283	22.64	%w/v	5.13631
Sucrose	22.14	1452.56	1.14142	14.45	%w/v	5.12997
Cellobiose			0		%w/v	0
Galacturonic Acid			0		%w/v	0
			Sum	100
2-19-21-Raw-WE-R1-50x-Rep2
						Dry Weight
Name	RT	Area	Amount	Peak Area Percent	Unit	22.25
2-Dog	7.2	2415.06	0.5	24.62	%w/v	% Dry Wt
Rhamnose			0		%w/v	0
Arabinose			0		%w/v	0
Galactose	13.36	87.0557	0.024273	0.89	%w/v	0.109092
Glucose	14.41	3670.54	1.1356	37.42	%w/v	5.10384
Xylose			0		%w/v	0
Fructose	17.38	2249.56	1.1658	22.93	%w/v	5.23953
Sucrose	22.13	1386.73	1.12474	14.14	%w/v	5.055
Cellobiose			0		%w/v	0
Galacturonic Acid			0		%w/v	0
			Sum	100
2-19-21-Raw-WE-R2-50x-Rep1
						Dry Weight
Name	RT	Area	Amount	Peak Area Percent	Unit	22.25
2-Dog	7.2	2396.07	0.5	24.92	%w/v	% Dry Wt
Rhamnose			0		%w/v	0
Arabinose			0		%w/v	0
Galactose	13.37	81.4719	0.022896	0.85	%w/v	0.102903
Glucose	14.42	3585.39	1.11805	37.28	%w/v	5.02495
Xylose			0		%w/v	0
Fructose	17.39	2214.4	1.15667	23.03	%w/v	5.1985
Sucrose	22.15	1339.32	1.09489	13.93	%w/v	4.92083
Cellobiose			0		%w/v	0
Galacturonic Acid			0		%w/v	0
			Sum	100
2-19-21-Raw-WE-R2-50x-Rep2
						Dry Weight
Name	RT	Area	Amount	Peak Area Percent	Unit	22.25
2-Dog	7.21	2441.51	0.5	24.84	%w/v	% Dry Wt
Rhamnose			0		%w/v	0
Arabinose			0		%w/v	0
Galactose	13.38	83.2269	0.022954	0.85	%w/v	0.103164
Glucose	14.43	3659.67	1.11998	37.23	%w/v	5.0336
Xylose			0		%w/v	0
Fructose	17.39	2253.49	1.15518	22.92	%w/v	5.19181
Sucrose	22.16	1392.7	1.11734	14.17	%w/v	5.02173
Cellobiose			0		%w/v	0
Galacturonic Acid			0		%w/v	0
			Sum	100
2-19-21-Raw-WE-R3-50x-Rep1
						Dry Weight
Name	RT	Area	Amount	Peak Area Percent	Unit	22.25
2-Dog	7.21	2400.21	0.5	23.74	%w/v	% Dry Wt
Rhamnose			0		%w/v	0
Arabinose			0		%w/v	0
Galactose	13.39	84.5424	0.023718	0.84	%w/v	0.106598
Glucose	14.43	3821.47	1.18962	37.8	%w/v	5.34659
Xylose			0		%w/v	0
Fructose	17.39	2347.72	1.22419	23.22	%w/v	5.50199
Sucrose	22.19	1455.64	1.18793	14.4	%w/v	5.339
Cellobiose			0		%w/v	0
Galacturonic Acid			0		%w/v	0
			Sum	100
2-19-21-Raw-WE-R3-50x-Rep2
						Dry Weight
Name	RT	Area	Amount	Peak Area Percent	Unit	22.25
2-Dog	7.21	2380.31	0.5	23.67	%w/v	% Dry Wt
Rhamnose			0		%w/v	0
Arabinose			0		%w/v	0
Galactose	13.39	86.4272	0.02445	0.86	%w/v	0.109888
Glucose	14.44	3777.9	1.18589	37.57	%w/v	5.32982
Xylose			0		%w/v	0
Fructose	17.39	2364.46	1.24323	23.52	%w/v	5.58753
Sucrose	22.2	1445.45	1.18948	14.38	%w/v	5.34596
Cellobiose			0		%w/v	0
Galacturonic Acid			0		%w/v	0
			Sum	100
3-5-21-Raw-WE-R1-50x-Rep1
						Dry Weight
Name	RT	Area	Amount	Peak Area Percent	Unit	23.93
2-Dog	7.23	2222.57	0.5	18.73	%w/v	% Dry Wt
Rhamnose			0		%w/v	0
Arabinose			0		%w/v	0
Galactose	13.42	97.484	0.028975	0.82	%w/v	0.121082
Glucose	14.46	4691.59	1.53118	39.54	%w/v	6.3986
Xylose			0		%w/v	0
Fructose	17.39	2553.96	1.27795	21.52	%w/v	5.34036
Sucrose	22.2	2300.28	2.14345	19.39	%w/v	8.95718
Cellobiose			0		%w/v	0
Galacturonic Acid			0		%w/v	0
			Sum	100
3-5-21-Raw-WE-R1-50x-Rep2
						Dry Weight
Name	RT	Area	Amount	Peak Area Percent	Unit	23.93
2-Dog	7.24	2235.47	0.5	18.72	%w/v	% Dry Wt
Rhamnose			0		%w/v	0
Arabinose			0		%w/v	0
Galactose	13.43	97.7556	0.028888	0.82	%w/v	0.120719
Glucose	14.48	4738.69	1.53763	39.69	%w/v	6.42555
Xylose			0		%w/v	0
Fructose	17.4	2517.23	1.2523	21.08	%w/v	5.23318
Sucrose	22.21	2349.81	2.17697	19.68	%w/v	9.09726
Cellobiose			0		%w/v	0
Galacturonic Acid			0		%w/v	0
			Sum	100
3-5-21-Raw-WE-R2-50x-Rep1
						Dry Weight
Name	RT	Area	Amount	Peak Area Percent	Unit	23.93
2-Dog	7.24	2241.49	0.5	18.49	%w/v	% Dry Wt
Rhamnose			0		%w/v	0
Arabinose			0		%w/v	0
Galactose	13.44	97.764	0.028813	0.81	%w/v	0.120405
Glucose	14.48	4815.15	1.55825	39.73	%w/v	6.51168
Xylose			0		%w/v	0
Fructose	17.4	2575.28	1.27774	21.25	%w/v	5.33948
Sucrose	22.22	2390.39	2.20862	19.72	%w/v	9.2295
Cellobiose			0		%w/v	0
Galacturonic Acid			0		%w/v	0
			Sum	100
3-5-21-Raw-WE-R2-50x-Rep2
						Dry Weight
Name	RT	Area	Amount	Peak Area Percent	Unit	23.93
2-Dog	7.23	2237.73	0.5	18.4	%w/v	% Dry Wt
Rhamnose			0		%w/v	0
Arabinose			0		%w/v	0
Galactose	13.41	95.6632	0.028241	0.79	%w/v	0.118015
Glucose	14.46	4813.24	1.56025	39.58	%w/v	6.52004
Xylose			0		%w/v	0
Fructose	17.38	2633.42	1.30878	21.66	%w/v	5.46921
Sucrose	22.19	2380.17	2.20288	19.57	%w/v	9.2055
Cellobiose			0		%w/v	0
Galacturonic Acid			0		%w/v	0
			Sum	100
3-5-21-Raw-WE-R3-50x-Rep1
						Dry Weight
Name	RT	Area	Amount	Peak Area Percent	Unit	23.93
2-Dog	7.23	2278.58	0.5	18.44	%w/v	% Dry Wt
Rhamnose			0		%w/v	0
Arabinose			0		%w/v	0
Galactose	13.42	97.5314	0.028276	0.79	%w/v	0.118161
Glucose	14.46	4888.03	1.55608	39.55	%w/v	6.50263
Xylose			0		%w/v	0
Fructose	17.38	2634.1	1.28565	21.31	%w/v	5.37254
Sucrose	22.19	2460.62	2.23651	19.91	%w/v	9.34603
Cellobiose			0		%w/v	0
Galacturonic Acid			0		%w/v	0
			Sum	100
3-5-21-Raw-WE-R3-50x-Rep2
						Dry Weight
Name	RT	Area	Amount	Peak Area Percent	Unit	23.93
2-Dog	7.24	2274.77	0.5	18.34	%w/v	% Dry Wt
Rhamnose			0		%w/v	0
Arabinose			0		%w/v	0
Galactose	13.43	101.199	0.029389	0.82	%w/v	0.122812
Glucose	14.48	4892.78	1.5602	39.44	%w/v	6.51986
Xylose			0		%w/v	0
Fructose	17.4	2661.67	1.30128	21.46	%w/v	5.43787
Sucrose	22.23	2474.31	2.25272	19.95	%w/v	9.41378
Cellobiose			0		%w/v	0
Galacturonic Acid			0		%w/v	0
			Sum	100
Citrus Fiber-WE-R1-10x-Rep1
						Dry Weight
Name	RT	Area	Amount	Peak Area Percent	Unit	91.3328
2-Dog	7.19	2650.4	0.1	83.93	%w/v	% Dry Wt
Rhamnose			0		%w/v	0
Arabinose	10.04	81.5628	0.00434	2.58	%w/v	0.00475185
Galactose	13.37	41.0274	0.002041	1.3	%w/v	0.00223468
Glucose	14.44	236.725	0.013039	7.5	%w/v	0.0142764
Xylose			0		%w/v	0
Fructose	17.72	62.8753	0.005868	1.99	%w/v	0.00642485
Sucrose	22.13	85.2489	0.014413	2.7	%w/v	0.0157807
Cellobiose			0		%w/v	0
Galacturonic Acid			0		%w/v	0
			Sum	100
Citrus Fiber-WE-R1-10x-Rep2
						Dry Weight
Name	RT	Area	Amount	Peak Area Percent	Unit	91.3328
2-Dog	7.19	2609.37	0.1	83.84	%w/v	% Dry Wt
Rhamnose			0		%w/v	0
Arabinose	10.04	83.5342	0.004515	2.68	%w/v	0.00494346
Galactose	13.36	47.3239	0.002391	1.52	%w/v	0.0026179
Glucose	14.44	235.407	0.013171	7.56	%w/v	0.0144209
Xylose			0		%w/v	0
Fructose	17.72	62.6774	0.005941	2.01	%w/v	0.00650478
Sucrose	22.14	74.1448	0.012733	2.38	%w/v	0.0139413
Cellobiose			0		%w/v	0
Galacturonic Acid			0		%w/v	0
			Sum	100
Citrus Fiber-WE-R2-10x-Rep1
						Dry Weight
Name	RT	Area	Amount	Peak Area Percent	Unit	91.3328
2-Dog	7.19	2605.46	0.1	83.54	%w/v	% Dry Wt
Rhamnose			0		%w/v	0
Arabinose	10.04	82.3136	0.004456	2.64	%w/v	0.00487886
Galactose	13.37	49.0126	0.00248	1.57	%w/v	0.00271534
Glucose	14.44	239.377	0.013413	7.67	%w/v	0.0146858
Xylose			0		%w/v	0
Fructose	17.72	63.6286	0.006041	2.04	%w/v	0.00661427
Sucrose	22.15	79.1381	0.013611	2.54	%w/v	0.0149026
Cellobiose			0		%w/v	0
Galacturonic Acid			0		%w/v	0
			Sum	100
Citrus Fiber-WE-R2-10x-Rep2
						Dry Weight
Name	RT	Area	Amount	Peak Area Percent	Unit	91.3328
2-Dog	7.2	2562.35	0.1	83.82	%w/v	% Dry Wt
Rhamnose			0		%w/v	0
Arabinose	10.05	84.3149	0.004641	2.76	%w/v	0.00508141
Galactose	13.38	45.86	0.00236	1.5	%w/v	0.00258396
Glucose	14.46	227.806	0.012979	7.45	%w/v	0.0142107
Xylose			0		%w/v	0
Fructose	17.72	63.4765	0.006127	2.08	%w/v	0.00670843
Sucrose	22.19	73.0308	0.012772	2.39	%w/v	0.013984
Cellobiose			0		%w/v	0
Galacturonic Acid			0		%w/v	0
			Sum	100
Citrus Fiber-WE-R3-10x-Rep1
						Dry Weight
Name	RT	Area	Amount	Peak Area Percent	Unit	91.3328
2-Dog	7.21	2506.78	0.1	83.79	%w/v	% Dry Wt
Rhamnose			0		%w/v	0
Arabinose	10.06	79.2277	0.004458	2.65	%w/v	0.00488105
Galactose	13.4	43.1936	0.002272	1.44	%w/v	0.0024876
Glucose	14.46	229.125	0.013344	7.66	%w/v	0.0146103
Xylose			0		%w/v	0
Fructose	17.73	63.3869	0.006254	2.12	%w/v	0.00684748
Sucrose	22.2	70.1558	0.012541	2.34	%w/v	0.0137311
Cellobiose			0		%w/v	0
Galacturonic Acid			0		%w/v	0
			Sum	100
Citrus Fiber-WE-R3-10x-Rep2
						Dry Weight
Name	RT	Area	Amount	Peak Area Percent	Unit	91.3328
2-Dog	7.2	2499.71	0.1	83.97	%w/v	% Dry Wt
Rhamnose			0		%w/v	0
Arabinose	10.06	77.1718	0.004354	2.59	%w/v	0.00476718
Galactose	13.4	40.1973	0.00212	1.35	%w/v	0.00232118
Glucose	14.47	224.7	0.013123	7.55	%w/v	0.0143683
Xylose			0		%w/v	0
Fructose	17.72	62.278	0.006162	2.09	%w/v	0.00674675
Sucrose	22.19	72.6916	0.013031	2.44	%w/v	0.0142676
Cellobiose			0		%w/v	0
Galacturonic Acid			0		%w/v	0
			Sum	100
Lemon Fiber-WE-R1-50x-Rep1
						Dry Weight
Name	RT	Area	Amount	Peak Area Percent	Unit	93.3538
2-Dog	7.2	1906.73	0.5	33.66	%w/v	% Dry Wt
Rhamnose			0		%w/v	0
Arabinose			0		%w/v	0
Galactose	13.24	39.1078	0.013023	0.69	%w/v	0.0139501
Glucose	14.27	2326.86	0.860911	41.07	%w/v	0.922202
Xylose			0		%w/v	0
Fructose	17.15	1058.62	0.643956	18.69	%w/v	0.689801
Sucrose	22.02	333.831	0.480952	5.89	%w/v	0.515192
Cellobiose			0		%w/v	0
Galacturonic Acid			0		%w/v	0
			Sum	100
Lemon Fiber-WE-R1-50x-Rep2
						Dry Weight
Name	RT	Area	Amount	Peak Area Percent	Unit	93.3538
2-Dog	7.2	1896.79	0.5	33.58	%w/v	% Dry Wt
Rhamnose			0		%w/v	0
Arabinose			0		%w/v	0
Galactose	13.23	41.2186	0.013797	0.73	%w/v	0.0147793
Glucose	14.27	2317.93	0.862106	41.04	%w/v	0.923482
Xylose			0		%w/v	0
Fructose	17.09	1049.15	0.64154	18.58	%w/v	0.687213
Sucrose	22	342.713	0.496337	6.07	%w/v	0.531673
Cellobiose			0		%w/v	0
Galacturonic Acid			0		%w/v	0
			Sum	100
Lemon Fiber-WE-R2-50x-Rep1
						Dry Weight
Name	RT	Area	Amount	Peak Area Percent	Unit	93.3538
2-Dog	7.21	1835.56	0.5	31.44	%w/v	% Dry Wt
Rhamnose			0		%w/v	0
Arabinose			0		%w/v	0
Galactose	13.26	40.8722	0.014138	0.7	%w/v	0.0151445
Glucose	14.27	2457.88	0.944645	42.1	%w/v	1.0119
Xylose			0		%w/v	0
Fructose	17.15	1137.37	0.718682	19.48	%w/v	0.769847
Sucrose	22.03	365.929	0.547636	6.27	%w/v	0.586624
Cellobiose			0		%w/v	0
Galacturonic Acid			0		%w/v	0
			Sum	100
Lemon Fiber-WE-R2-50x-Rep2
						Dry Weight
Name	RT	Area	Amount	Peak Area Percent	Unit	93.3538
2-Dog	7.2	1825.95	0.5	31.38	%w/v	% Dry Wt
Rhamnose			0		%w/v	0
Arabinose			0		%w/v	0
Galactose	13.21	41.2718	0.014351	0.71	%w/v	0.0153727
Glucose	14.25	2451.02	0.946966	42.12	%w/v	1.01438
Xylose			0		%w/v	0
Fructose	17.09	1140.17	0.724245	19.59	%w/v	0.775806
Sucrose	22	361.203	0.543409	6.21	%w/v	0.582096
Cellobiose			0		%w/v	0
Galacturonic Acid			0		%w/v	0
			Sum	100
Lemon Fiber-WE-R3-50x-Rep1
						Dry Weight
Name	RT	Area	Amount	Peak Area Percent	Unit	93.3538
2-Dog	7.21	1878.91	0.5	31.93	%w/v	% Dry Wt
Rhamnose			0		%w/v	0
Arabinose			0		%w/v	0
Galactose	13.26	40.4561	0.013671	0.69	%w/v	0.0146443
Glucose	14.28	2467.21	0.926355	41.93	%w/v	0.992305
Xylose			0		%w/v	0
Fructose	17.15	1140.57	0.704081	19.38	%w/v	0.754207
Sucrose	22.02	357.071	0.522051	6.07	%w/v	0.559217
Cellobiose			0		%w/v	0
Galacturonic Acid			0		%w/v	0
			Sum	100
Lemon Fiber-WE-R3-50x-Rep2
						Dry Weight
Name	RT	Area	Amount	Peak Area Percent	Unit	93.3538
2-Dog	7.2	1879.18	0.5	31.98	%w/v	% Dry Wt
Rhamnose			0		%w/v	0
Arabinose			0		%w/v	0
Galactose	13.23	38.5301	0.013018	0.66	%w/v	0.0139448
Glucose	14.26	2458.61	0.922993	41.84	%w/v	0.988704
Xylose			0		%w/v	0
Fructose	17.07	1141.1	0.704305	19.42	%w/v	0.754447
Sucrose	21.98	359.262	0.525179	6.11	%w/v	0.562568
Cellobiose			0		%w/v	0
Galacturonic Acid			0		%w/v	0
			Sum	100
Orange Fiber-WE-R1-50x-Rep1
						Dry Weight
Name	RT	Area	Amount	Peak Area Percent	Unit	91.0535
2-Dog	7.19	1749.89	0.5	23.02	%w/v	% Dry Wt
Rhamnose			0		%w/v	0
Arabinose			0		%w/v	0
Galactose	13.18	57.7254	0.020945	0.76	%w/v	0.023003
Glucose	14.22	2908.46	1.17255	38.26	%w/v	1.28776
Xylose			0		%w/v	0
Fructose	17.06	2075.19	1.37548	27.3	%w/v	1.51062
Sucrose	21.95	810.07	1.27168	10.66	%w/v	1.39663
Cellobiose			0		%w/v	0
Galacturonic Acid			0		%w/v	0
			Sum	100
Orange Fiber-WE-R1-50x-Rep2
						Dry Weight
Name	RT	Area	Amount	Peak Area Percent	Unit	91.0535
2-Dog	7.19	1715.79	0.5	22.97	%w/v	% Dry Wt
Rhamnose			0		%w/v	0
Arabinose			0		%w/v	0
Galactose	13.18	59.9735	0.022193	0.8	%w/v	0.0243736
Glucose	14.23	2867.94	1.17919	38.4	%w/v	1.29506
Xylose			0		%w/v	0
Fructose	17.03	2036.51	1.37667	27.27	%w/v	1.51193
Sucrose	21.95	788.935	1.26311	10.56	%w/v	1.38722
Cellobiose			0		%w/v	0
Galacturonic Acid			0		%w/v	0
			Sum	100
Orange Fiber-WE-R2-50x-Rep1
						Dry Weight
Name	RT	Area	Amount	Peak Area Percent	Unit	91.0535
2-Dog	7.2	1724.41	0.5	23.14	%w/v	% Dry Wt
Rhamnose			0		%w/v	0
Arabinose			0		%w/v	0
Galactose	13.21	58.4766	0.021531	0.78	%w/v	0.0236465
Glucose	14.25	2853.45	1.16737	38.29	%w/v	1.28207
Xylose			0		%w/v	0
Fructose	17.07	2025.91	1.36265	27.18	%w/v	1.49654
Sucrose	21.98	790.891	1.25991	10.61	%w/v	1.38371
Cellobiose			0		%w/v	0
Galacturonic Acid			0		%w/v	0
			Sum	100
Orange Fiber-WE-R2-50x-Rep2
						Dry Weight
Name	RT	Area	Amount	Peak Area Percent	Unit	91.0535
2-Dog	7.2	1712.06	0.5	23.17	%w/v	% Dry Wt
Rhamnose			0		%w/v	0
Arabinose			0		%w/v	0
Galactose	13.19	58.1241	0.021556	0.79	%w/v	0.023674
Glucose	14.25	2829.12	1.16576	38.29	%w/v	1.2803
Xylose			0		%w/v	0
Fructose	17.04	1999.64	1.35468	27.07	%w/v	1.48779
Sucrose	21.98	788.998	1.26596	10.68	%w/v	1.39035
Cellobiose			0		%w/v	0
Galacturonic Acid			0		%w/v	0
			Sum	100
Orange Fiber-WE-R3-50x-Rep1
						Dry Weight
Name	RT	Area	Amount	Peak Area Percent	Unit	91.0535
2-Dog	7.2	1718.74	0.5	24.09	%w/v	% Dry Wt
Rhamnose			0		%w/v	0
Arabinose			0		%w/v	0
Galactose	13.21	54.1514	0.020004	0.76	%w/v	0.0219695
Glucose	14.26	2701.7	1.10893	37.87	%w/v	1.21789
Xylose			0		%w/v	0
Fructose	17.07	1912.44	1.29057	26.81	%w/v	1.41738
Sucrose	22	747.146	1.19415	10.47	%w/v	1.31148
Cellobiose			0		%w/v	0
Galacturonic Acid			0		%w/v	0
			Sum	100
Orange Fiber-WE-R3-50x-Rep2
						Dry Weight
Name	RT	Area	Amount	Peak Area Percent	Unit	91.0535
2-Dog	7.2	1737.52	0.5	23.97	%w/v	% Dry Wt
Rhamnose			0		%w/v	0
Arabinose			0		%w/v	0
Galactose	13.22	59.3006	0.02167	0.82	%w/v	0.0237992
Glucose	14.25	2730.97	1.10883	37.68	%w/v	1.21778
Xylose			0		%w/v	0
Fructose	17.06	1947.2	1.29983	26.87	%w/v	1.42754
Sucrose	21.99	772.331	1.22106	10.66	%w/v	1.34103
Cellobiose			0		%w/v	0
Galacturonic Acid			0		%w/v	0
			Sum	100
Citrus Fiber_Orange Fiber_3-1-WE-R1-10x-Rep1
						Dry Weight
Name	RT	Area	Amount	Peak Area Percent	Unit	98.9484
2-Dog	7.21	1847.07	0.1	16.65	%w/v	% Dry Wt
Rhamnose			0		%w/v	0
Arabinose	10.06	44.2807	0.003381	0.4	%w/v	0.00341693
Galactose	13.4	94.2929	0.006731	0.85	%w/v	0.00680253
Glucose	14.42	4429.77	0.35012	39.93	%w/v	0.353841
Xylose			0		%w/v	0
Fructose	17.35	3095.71	0.414556	27.91	%w/v	0.418962
Sucrose	22.17	1582.18	0.383842	14.26	%w/v	0.387921
Cellobiose			0		%w/v	0
Galacturonic Acid			0		%w/v	0
			Sum	100
Citrus Fiber_Orange Fiber_3-1-WE-R1-10x-Rep2
						Dry Weight
Name	RT	Area	Amount	Peak Area Percent	Unit	98.9484
2-Dog	7.21	1824.67	0.1	16.67	%w/v	% Dry Wt
Rhamnose			0		%w/v	0
Arabinose	10.07	41.5959	0.003215	0.38	%w/v	0.00324917
Galactose	13.4	91.7305	0.006629	0.84	%w/v	0.00669945
Glucose	14.43	4358.07	0.348683	39.83	%w/v	0.352389
Xylose			0		%w/v	0
Fructose	17.35	3070.63	0.416246	28.06	%w/v	0.42067
Sucrose	22.19	1556.19	0.382171	14.22	%w/v	0.386233
Cellobiose			0		%w/v	0
Galacturonic Acid			0		%w/v	0
			Sum	100
Citrus Fiber_Orange Fiber_3-1-WE-R2-10x-Rep1
						Dry Weight
Name	RT	Area	Amount	Peak Area Percent	Unit	98.9484
2-Dog	7.22	1880.39	0.1	16.69	%w/v	% Dry Wt
Rhamnose			0		%w/v	0
Arabinose	10.06	43.7428	0.003281	0.39	%w/v	0.00331587
Galactose	13.41	94.3564	0.006616	0.84	%w/v	0.00668631
Glucose	14.42	4462.51	0.346458	39.61	%w/v	0.35014
Xylose			0		%w/v	0
Fructose	17.35	3182.69	0.418651	28.25	%w/v	0.4231
Sucrose	22.19	1602.06	0.381776	14.22	%w/v	0.385833
Cellobiose			0		%w/v	0
Galacturonic Acid			0		%w/v	0
			Sum	100
Citrus Fiber_Orange Fiber_3-1-WE-R2-10x-Rep2
						Dry Weight
Name	RT	Area	Amount	Peak Area Percent	Unit	98.9484
2-Dog	7.21	1864.6	0.1	16.65	%w/v	% Dry Wt
Rhamnose			0		%w/v	0
Arabinose	10.06	44.7282	0.003383	0.4	%w/v	0.00341895
Galactose	13.39	93.365	0.006602	0.83	%w/v	0.00667216
Glucose	14.41	4441.48	0.347747	39.66	%w/v	0.351443
Xylose			0		%w/v	0
Fructose	17.34	3181.21	0.422001	28.41	%w/v	0.426486
Sucrose	22.17	1572.29	0.377857	14.04	%w/v	0.381873
Cellobiose			0		%w/v	0
Galacturonic Acid			0		%w/v	0
			Sum	100
Citrus Fiber_Orange Fiber_3-1-WE-R3-10x-Rep1
						Dry Weight
Name	RT	Area	Amount	Peak Area Percent	Unit	98.9484
2-Dog	7.21	1846.95	0.1	16.77	%w/v	% Dry Wt
Rhamnose			0		%w/v	0
Arabinose	10.06	44.0026	0.00336	0.4	%w/v	0.00339571
Galactose	13.4	91.5249	0.006534	0.83	%w/v	0.00660344
Glucose	14.42	4371.56	0.345543	39.7	%w/v	0.349215
Xylose			0		%w/v	0
Fructose	17.35	3111.1	0.416645	28.25	%w/v	0.421073
Sucrose	22.18	1545.76	0.37503	14.04	%w/v	0.379016
Cellobiose			0		%w/v	0
Galacturonic Acid			0		%w/v	0
			Sum	100
Citrus Fiber_Orange Fiber_3-1-WE-R3-10x-Rep2
						Dry Weight
Name	RT	Area	Amount	Peak Area Percent	Unit	98.9484
2-Dog	7.21	1835.47	0.1	16.78	%w/v	% Dry Wt
Rhamnose			0		%w/v	0
Arabinose	10.06	41.2697	0.003171	0.38	%w/v	0.0032047
Galactose	13.39	93.6078	0.006725	0.86	%w/v	0.00679647
Glucose	14.41	4333.2	0.344652	39.63	%w/v	0.348315
Xylose			0		%w/v	0
Fructose	17.34	3111.59	0.419316	28.45	%w/v	0.423772
Sucrose	22.16	1520.35	0.371172	13.9	%w/v	0.375117
Cellobiose			0		%w/v	0
Galacturonic Acid			0		%w/v	0
			Sum	100
2-3-21-130C-1m-WE-R1-10x-Rep1
						Dry Weight
Name	RT	Area	Amount	Peak Area Percent	Unit	9.50834
2-Dog	7.22	1422.63	0.1	25.68	%w/v	% Dry Wt
Rhamnose			0		%w/v	0
Arabinose			0		%w/v	0
Galactose	13.4	38.4161	0.003393	0.69	%w/v	0.0356845
Glucose	14.44	2078.87	0.204748	37.52	%w/v	2.15335
Xylose			0		%w/v	0
Fructose	17.41	1498.05	0.20702	27.04	%w/v	2.17725
Sucrose	22.22	502.604	0.263905	9.07	%w/v	2.77551
Cellobiose			0		%w/v	0
Galacturonic Acid			0		%w/v	0
			Sum	100
2-3-21-130C-1m-WE-R1-10x-Rep2
						Dry Weight
Name	RT	Area	Amount	Peak Area Percent	Unit	9.50834
2-Dog	7.22	1419.88	0.1	25.43	%w/v	% Dry Wt
Rhamnose			0		%w/v	0
Arabinose			0		%w/v	0
Galactose	13.41	40.6016	0.003593	0.73	%w/v	0.0377879
Glucose	14.45	2087.76	0.206022	37.39	%w/v	2.16675
Xylose			0		%w/v	0
Fructose	17.41	1528.01	0.211569	27.36	%w/v	2.22509
Sucrose	22.22	507.949	0.267228	9.1	%w/v	2.81046
Cellobiose			0		%w/v	0
Galacturonic Acid			0		%w/v	0
			Sum	100
2-3-21-130C-1m-WE-R2-10x-Rep1
						Dry Weight
Name	RT	Area	Amount	Peak Area Percent	Unit	9.50834
2-Dog	7.22	1407.4	0.1	24.36	%w/v	% Dry Wt
Rhamnose			0		%w/v	0
Arabinose			0		%w/v	0
Galactose	13.39	41.1922	0.003678	0.71	%w/v	0.0386818
Glucose	14.45	2195	0.218526	37.99	%w/v	2.29826
Xylose			0		%w/v	0
Fructose	17.4	1593.19	0.222551	27.57	%w/v	2.34059
Sucrose	22.22	541.396	0.287351	9.37	%w/v	3.0221
Cellobiose			0		%w/v	0
Galacturonic Acid			0		%w/v	0
			Sum	100
2-3-21-130C-1m-WE-R2-10x-Rep2
						Dry Weight
Name	RT	Area	Amount	Peak Area Percent	Unit	9.50834
2-Dog	7.22	1416.82	0.1	24.36	%w/v	% Dry Wt
Rhamnose			0		%w/v	0
Arabinose			0		%w/v	0
Galactose	13.4	39.8336	0.003533	0.68	%w/v	0.0371569
Glucose	14.45	2202.27	0.217792	37.87	%w/v	2.29054
Xylose			0		%w/v	0
Fructose	17.41	1602.38	0.222345	27.55	%w/v	2.33842
Sucrose	22.23	554.749	0.29248	9.54	%w/v	3.07604
Cellobiose			0		%w/v	0
Galacturonic Acid			0		%w/v	0
			Sum	100
2-3-21-130C-1m-WE-R3-10x-Rep1
						Dry Weight
Name	RT	Area	Amount	Peak Area Percent	Unit	9.50834
2-Dog	7.22	1444.82	0.1	26.39	%w/v	% Dry Wt
Rhamnose			0		%w/v	0
Arabinose			0		%w/v	0
Galactose	13.41	39.5482	0.00344	0.72	%w/v	0.0361788
Glucose	14.46	2018.33	0.195732	36.87	%w/v	2.05853
Xylose			0		%w/v	0
Fructose	17.42	1457.97	0.198386	26.63	%w/v	2.08644
Sucrose	22.24	513.913	0.265698	9.39	%w/v	2.79437
Cellobiose			0		%w/v	0
Galacturonic Acid			0		%w/v	0
			Sum	100
2-3-21-130C-1m-WE-R3-10x-Rep2
						Dry Weight
Name	RT	Area	Amount	Peak Area Percent	Unit	9.50834
2-Dog	7.22	1447.76	0.1	26.43	%w/v	% Dry Wt
Rhamnose			0		%w/v	0
Arabinose			0		%w/v	0
Galactose	13.41	41.8239	0.00363	0.76	%w/v	0.038177
Glucose	14.45	2016.62	0.19517	36.81	%w/v	2.05262
Xylose			0		%w/v	0
Fructose	17.41	1459.25	0.198158	26.64	%w/v	2.08404
Sucrose	22.22	513.232	0.264808	9.37	%w/v	2.78501
Cellobiose			0		%w/v	0
Galacturonic Acid			0		%w/v	0
			Sum	100
130C-2min-WE-R1-10x-Rep1
						Dry Weight
Name	RT	Area	Amount	Peak Area Percent	Unit	8.37755
2-Dog	7.31	1517.56	0.1	32.73	%w/v	% Dry Wt
Rhamnose			0		%w/v	0
Arabinose			0		%w/v	0
Galactose	13.49	44.0107	0.00361	0.95	%w/v	0.0430913
Glucose	14.58	1676.19	0.155186	36.15	%w/v	1.8524
Xylose			0		%w/v	0
Fructose	17.43	1023.01	0.130151	22.07	%w/v	1.55357
Sucrose	22.24	375.528	0.119961	8.1	%w/v	1.43193
Cellobiose			0		%w/v	0
Galacturonic Acid			0		%w/v	0
			Sum	100
130C-2min-WE-R1-10x-Rep2
						Dry Weight
Name	RT	Area	Amount	Peak Area Percent	Unit	8.37755
2-Dog	7.31	1529.28	0.1	33.01	%w/v	% Dry Wt
Rhamnose			0		%w/v	0
Arabinose			0		%w/v	0
Galactose	13.46	38.1104	0.003102	0.82	%w/v	0.0370275
Glucose	14.56	1682.59	0.154584	36.32	%w/v	1.84522
Xylose			0		%w/v	0
Fructose	17.4	1012.28	0.127799	21.85	%w/v	1.52549
Sucrose	22.24	370.053	0.117306	7.99	%w/v	1.40024
Cellobiose			0		%w/v	0
Galacturonic Acid			0		%w/v	0
			Sum	100
130C-2min-WE-R2-10x-Rep1
						Dry Weight
Name	RT	Area	Amount	Peak Area Percent	Unit	8.37755
2-Dog	7.3	1552.11	0.1	33.05	%w/v	% Dry Wt
Rhamnose			0		%w/v	0
Arabinose			0		%w/v	0
Galactose	13.45	39.8577	0.003197	0.85	%w/v	0.0381615
Glucose	14.55	1724	0.156059	36.71	%w/v	1.86282
Xylose			0		%w/v	0
Fructose	17.39	1011.73	0.125851	21.55	%w/v	1.50224
Sucrose	22.23	368.188	0.114998	7.84	%w/v	1.37269
Cellobiose			0		%w/v	0
Galacturonic Acid			0		%w/v	0
			Sum	100
130C-2min-WE-R2-10x-Rep2
						Dry Weight
Name	RT	Area	Amount	Peak Area Percent	Unit	8.37755
2-Dog	7.31	1575.6	0.1	33.17	%w/v	% Dry Wt
Rhamnose			0		%w/v	0
Arabinose			0		%w/v	0
Galactose	13.49	41.656	0.003291	0.88	%w/v	0.0392835
Glucose	14.57	1722.53	0.153601	36.26	%w/v	1.83348
Xylose			0		%w/v	0
Fructose	17.41	1029.14	0.126108	21.66	%w/v	1.50531
Sucrose	22.24	381.668	0.117431	8.03	%w/v	1.40173
Cellobiose			0		%w/v	0
Galacturonic Acid			0		%w/v	0
			Sum	100
130C-2min-WE-R3-10x-Rep1
						Dry Weight
Name	RT	Area	Amount	Peak Area Percent	Unit	8.37755
2-Dog	7.3	1511.28	0.1	32.86	%w/v	% Dry Wt
Rhamnose			0		%w/v	0
Arabinose			0		%w/v	0
Galactose	13.44	41.1102	0.003386	0.89	%w/v	0.0404175
Glucose	14.54	1675.42	0.155759	36.42	%w/v	1.85924
Xylose			0		%w/v	0
Fructose	17.39	1005.65	0.128475	21.86	%w/v	1.53356
Sucrose	22.24	366.258	0.117486	7.96	%w/v	1.40239
Cellobiose			0		%w/v	0
Galacturonic Acid			0		%w/v	0
			Sum	100
130C-2min-WE-R3-10x-Rep2
						Dry Weight
Name	RT	Area	Amount	Peak Area Percent	Unit	8.37755
2-Dog	7.3	1513.2	0.1	32.95	%w/v	% Dry Wt
Rhamnose			0		%w/v	0
Arabinose			0		%w/v	0
Galactose	13.45	36.4483	0.002999	0.79	%w/v	0.035798
Glucose	14.55	1669.81	0.15504	36.36	%w/v	1.85066
Xylose			0		%w/v	0
Fructose	17.38	1018.62	0.129965	22.18	%w/v	1.55135
Sucrose	22.23	353.838	0.113358	7.71	%w/v	1.35312
Cellobiose			0		%w/v	0
Galacturonic Acid			0		%w/v	0
			Sum	100
130C-4m-WE-R1-10x-Rep1
						Dry Weight
Name	RT	Area	Amount	Peak Area Percent	Unit	8.97384
2-Dog	7.23	1185.46	0.1	25.12	%w/v	% Dry Wt
Rhamnose			0		%w/v	0
Arabinose			0		%w/v	0
Galactose	13.28	31.1191	0.003323	0.66	%w/v	0.0370298
Glucose	14.33	1876.69	0.228692	39.76	%w/v	2.54843
Xylose			0		%w/v	0
Fructose	17.19	1299.76	0.227735	27.54	%w/v	2.53776
Sucrose	22.09	326.747	0.235	6.92	%w/v	2.61872
Cellobiose			0		%w/v	0
Galacturonic Acid			0		%w/v	0
			Sum	100
130C-4m-WE-R1-10x-Rep2
						Dry Weight
Name	RT	Area	Amount	Peak Area Percent	Unit	8.97384
2-Dog	7.21	1196.98	0.1	25.27	%w/v	% Dry Wt
Rhamnose			0		%w/v	0
Arabinose			0		%w/v	0
Galactose	13.23	36.6808	0.00388	0.77	%w/v	0.0432368
Glucose	14.26	1883.91	0.227364	39.77	%w/v	2.53363
Xylose			0		%w/v	0
Fructose	17.13	1293.64	0.224484	27.31	%w/v	2.50154
Sucrose	22.09	325.804	0.232067	6.88	%w/v	2.58604
Cellobiose			0		%w/v	0
Galacturonic Acid			0		%w/v	0
			Sum	100
130C-4m-WE-R2-10x-Rep1
						Dry Weight
Name	RT	Area	Amount	Peak Area Percent	Unit	8.97384
2-Dog	7.21	1208.28	0.1	25.41	%w/v	% Dry Wt
Rhamnose			0		%w/v	0
Arabinose			0		%w/v	0
Galactose	13.22	33.9339	0.003555	0.71	%w/v	0.0396151
Glucose	14.27	1887.53	0.225671	39.69	%w/v	2.51476
Xylose			0		%w/v	0
Fructose	17.14	1302.29	0.223871	27.39	%w/v	2.49471
Sucrose	22.09	323.259	0.228102	6.8	%w/v	2.54185
Cellobiose			0		%w/v	0
Galacturonic Acid			0		%w/v	0
			Sum	100
130C-4m-WE-R2-10x-Rep2
						Dry Weight
Name	RT	Area	Amount	Peak Area Percent	Unit	8.97384
2-Dog	7.21	1206.96	0.1	25.46	%w/v	% Dry Wt
Rhamnose			0		%w/v	0
Arabinose			0		%w/v	0
Galactose	13.21	33.4739	0.003511	0.71	%w/v	0.0391248
Glucose	14.26	1864.19	0.223124	39.32	%w/v	2.48638
Xylose			0		%w/v	0
Fructose	17.12	1312.6	0.22589	27.69	%w/v	2.5172
Sucrose	22.09	323.686	0.228653	6.83	%w/v	2.54799
Cellobiose			0		%w/v	0
Galacturonic Acid			0		%w/v	0
			Sum	100
130C-4m-WE-R3-10x-Rep1
						Dry Weight
Name	RT	Area	Amount	Peak Area Percent	Unit	8.97384
2-Dog	7.22	1195.11	0.1	25.92	%w/v	% Dry Wt
Rhamnose			0		%w/v	0
Arabinose			0		%w/v	0
Galactose	13.24	31.3589	0.003322	0.68	%w/v	0.0370187
Glucose	14.27	1800.67	0.217658	39.05	%w/v	2.42547
Xylose			0		%w/v	0
Fructose	17.14	1273.79	0.221386	27.63	%w/v	2.46701
Sucrose	22.1	310.022	0.221173	6.72	%w/v	2.46464
Cellobiose			0		%w/v	0
Galacturonic Acid			0		%w/v	0
			Sum	100
130C-4m-WE-R3-10x-Rep2
						Dry Weight
Name	RT	Area	Amount	Peak Area Percent	Unit	8.97384
2-Dog	7.23	1202.62	0.1	26.12	%w/v	% Dry Wt
Rhamnose			0		%w/v	0
Arabinose			0		%w/v	0
Galactose	13.3	29.3715	0.003092	0.64	%w/v	0.0344557
Glucose	14.33	1783.28	0.21421	38.73	%w/v	2.38705
Xylose			0		%w/v	0
Fructose	17.18	1278.76	0.220861	27.77	%w/v	2.46116
Sucrose	22.11	310.11	0.219854	6.74	%w/v	2.44994
Cellobiose			0		%w/v	0
Galacturonic Acid			0		%w/v	0
			Sum	100
130C-8m-WE-R1-10x-Rep1
						Dry Weight
Name	RT	Area	Amount	Peak Area Percent	Unit	8.31494
2-Dog	7.22	1230.14	0.1	35.43	%w/v	% Dry Wt
Rhamnose			0		%w/v	0
Arabinose			0		%w/v	0
Galactose	13.25	27.8355	0.002865	0.8	%w/v	0.0344561
Glucose	14.3	1266.75	0.148759	36.49	%w/v	1.78906
Xylose			0		%w/v	0
Fructose	17.21	733.412	0.123837	21.13	%w/v	1.48933
Sucrose	22.11	213.556	0.148014	6.15	%w/v	1.7801
Cellobiose			0		%w/v	0
Galacturonic Acid			0		%w/v	0
			Sum	100
130C-8m-WE-R1-10x-Rep2
						Dry Weight
Name	RT	Area	Amount	Peak Area Percent	Unit	8.31494
2-Dog	7.23	1242.53	0.1	35.47	%w/v	% Dry Wt
Rhamnose			0		%w/v	0
Arabinose			0		%w/v	0
Galactose	13.31	27.2954	0.002781	0.78	%w/v	0.0334458
Glucose	14.34	1274.03	0.148123	36.37	%w/v	1.78141
Xylose			0		%w/v	0
Fructose	17.24	744.645	0.12448	21.26	%w/v	1.49707
Sucrose	22.11	214.318	0.147061	6.12	%w/v	1.76864
Cellobiose			0		%w/v	0
Galacturonic Acid			0		%w/v	0
			Sum	100
130C-8m-WE-R2-10x-Rep1
						Dry Weight
Name	RT	Area	Amount	Peak Area Percent	Unit	8.31494
2-Dog	7.21	1245.34	0.1	34.87	%w/v	% Dry Wt
Rhamnose			0		%w/v	0
Arabinose			0		%w/v	0
Galactose	13.28	25.6771	0.00261	0.72	%w/v	0.0313893
Glucose	14.29	1307.07	0.151621	36.59	%w/v	1.82348
Xylose			0		%w/v	0
Fructose	17.21	774.284	0.129142	21.68	%w/v	1.55313
Sucrose	22.09	219.462	0.15025	6.14	%w/v	1.80699
Cellobiose			0		%w/v	0
Galacturonic Acid			0		%w/v	0
			Sum	100
130C-8m-WE-R2-10x-Rep2
						Dry Weight
Name	RT	Area	Amount	Peak Area Percent	Unit	8.31494
2-Dog	7.22	1252.98	0.1	34.85	%w/v	% Dry Wt
Rhamnose			0		%w/v	0
Arabinose			0		%w/v	0
Galactose	13.24	28.5038	0.00288	0.79	%w/v	0.0346365
Glucose	14.32	1315.23	0.151637	36.58	%w/v	1.82367
Xylose			0		%w/v	0
Fructose	17.22	778.05	0.128979	21.64	%w/v	1.55117
Sucrose	22.1	221.007	0.150385	6.15	%w/v	1.80861
Cellobiose			0		%w/v	0
Galacturonic Acid			0		%w/v	0
			Sum	100
130C-8m-WE-R3-10x-Rep1
						Dry Weight
Name	RT	Area	Amount	Peak Area Percent	Unit	8.31494
2-Dog	7.23	1288.1	0.1	36.12	%w/v	% Dry Wt
Rhamnose			0		%w/v	0
Arabinose			0		%w/v	0
Galactose	13.28	30.1694	0.002965	0.85	%w/v	0.0356587
Glucose	14.33	1274.18	0.142898	35.73	%w/v	1.71857
Xylose			0		%w/v	0
Fructose	17.24	754.276	0.121629	21.15	%w/v	1.46278
Sucrose	22.09	219.276	0.14514	6.15	%w/v	1.74553
Cellobiose			0		%w/v	0
Galacturonic Acid			0		%w/v	0
			Sum	100
130C-8m-WE-R3-10x-Rep2
						Dry Weight
Name	RT	Area	Amount	Peak Area Percent	Unit	8.31494
2-Dog	7.21	1285.13	0.1	36.13	%w/v	% Dry Wt
Rhamnose			0		%w/v	0
Arabinose			0		%w/v	0
Galactose	13.21	28.5273	0.00281	0.8	%w/v	0.0337946
Glucose	14.28	1278.4	0.143704	35.94	%w/v	1.72826
Xylose			0		%w/v	0
Fructose	17.2	754.7	0.121978	21.22	%w/v	1.46697
Sucrose	22.08	210.022	0.139335	5.9	%w/v	1.67572
Cellobiose			0		%w/v	0
Galacturonic Acid			0		%w/v	0
			Sum	100
150C-1m-WE-R1-10x-Rep1
						Dry Weight
Name	RT	Area	Amount	Peak Area Percent	Unit	9.74289
2-Dog	7.29	1733.56	0.1	27.39	%w/v	% Dry Wt
Rhamnose			0		%w/v	0
Arabinose			0		%w/v	0
Galactose	13.42	56.2471	0.004182	0.89	%w/v	0.0429236
Glucose	14.52	2505.2	0.202893	39.58	%w/v	2.08247
Xylose			0		%w/v	0
Fructose	17.37	1275.34	0.162482	20.15	%w/v	1.6677
Sucrose	22.19	758.703	0.199602	11.99	%w/v	2.04869
Cellobiose			0		%w/v	0
Galacturonic Acid			0		%w/v	0
			Sum	100
150C-1m-WE-R1-10x-Rep2
						Dry Weight
Name	RT	Area	Amount	Peak Area Percent	Unit	9.74289
2-Dog	7.29	1723.58	0.1	27.39	%w/v	% Dry Wt
Rhamnose			0		%w/v	0
Arabinose			0		%w/v	0
Galactose	13.41	53.4632	0.003998	0.85	%w/v	0.041035
Glucose	14.51	2503.54	0.203932	39.79	%w/v	2.09314
Xylose			0		%w/v	0
Fructose	17.36	1251.33	0.160347	19.89	%w/v	1.64578
Sucrose	22.2	760.508	0.201235	12.09	%w/v	2.06545
Cellobiose			0		%w/v	0
Galacturonic Acid			0		%w/v	0
			Sum	100
150C-1m-WE-R2-10x-Rep1
						Dry Weight
Name	RT	Area	Amount	Peak Area Percent	Unit	9.74289
2-Dog	7.3	1752.72	0.1	28	%w/v	% Dry Wt
Rhamnose			0		%w/v	0
Arabinose			0		%w/v	0
Galactose	13.45	57.8874	0.004257	0.92	%w/v	0.0436934
Glucose	14.53	2478.12	0.198507	39.59	%w/v	2.03745
Xylose			0		%w/v	0
Fructose	17.39	1228.77	0.154838	19.63	%w/v	1.58924
Sucrose	22.21	741.382	0.192913	11.85	%w/v	1.98004
Cellobiose			0		%w/v	0
Galacturonic Acid			0		%w/v	0
			Sum	100
150C-1m-WE-R2-10x-Rep2
						Dry Weight
Name	RT	Area	Amount	Peak Area Percent	Unit	9.74289
2-Dog	7.29	1745.22	0.1	27.88	%w/v	% Dry Wt
Rhamnose			0		%w/v	0
Arabinose			0		%w/v	0
Galactose	13.42	55.9855	0.004135	0.89	%w/v	0.0424412
Glucose	14.52	2481.53	0.199633	39.65	%w/v	2.04901
Xylose			0		%w/v	0
Fructose	17.37	1232.83	0.156017	19.7	%w/v	1.60134
Sucrose	22.21	743.595	0.19432	11.88	%w/v	1.99448
Cellobiose			0		%w/v	0
Galacturonic Acid			0		%w/v	0
			Sum	100
150C-1m-WE-R3-10x-Rep1
						Dry Weight
Name	RT	Area	Amount	Peak Area Percent	Unit	9.74289
2-Dog	7.3	1736.54	0.1	27.87	%w/v	% Dry Wt
Rhamnose			0		%w/v	0
Arabinose			0		%w/v	0
Galactose	13.43	54.7835	0.004067	0.88	%w/v	0.0417432
Glucose	14.52	2452.8	0.198308	39.36	%w/v	2.03541
Xylose			0		%w/v	0
Fructose	17.37	1240.24	0.157739	19.9	%w/v	1.61902
Sucrose	22.22	747.221	0.196243	11.99	%w/v	2.01422
Cellobiose			0		%w/v	0
Galacturonic Acid			0		%w/v	0
			Sum	100
150C-1m-WE-R3-10x-Rep2
						Dry Weight
Name	RT	Area	Amount	Peak Area Percent	Unit	9.74289
2-Dog	7.29	1728.69	0.1	27.66	%w/v	% Dry Wt
Rhamnose			0		%w/v	0
Arabinose			0		%w/v	0
Galactose	13.43	58.0359	0.004328	0.93	%w/v	0.0444221
Glucose	14.51	2452.83	0.199211	39.24	%w/v	2.04468
Xylose			0		%w/v	0
Fructose	17.36	1252.19	0.159982	20.03	%w/v	1.64204
Sucrose	22.22	758.674	0.200156	12.14	%w/v	2.05438
Cellobiose			0		%w/v	0
Galacturonic Acid			0		%w/v	0
			Sum	100
150C-2min-WE-R1-10x-Rep1
						Dry Weight
Name	RT	Area	Amount	Peak Area Percent	Unit	7.39319
2-Dog	7.24	1417.34	0.1	39.58	%w/v	% Dry Wt
Rhamnose			0		%w/v	0
Arabinose			0		%w/v	0
Galactose	13.44	36.8563	0.003459	1.03	%w/v	0.0467863
Glucose	14.52	1211.86	0.131561	33.84	%w/v	1.77949
Xylose			0		%w/v	0
Fructose	17.53	703.423	0.104014	19.64	%w/v	1.40689
Sucrose	22.33	211.639	0.070198	5.91	%w/v	0.949496
Cellobiose			0		%w/v	0
Galacturonic Acid			0		%w/v	0
			Sum	100
150C-2min-WE-R1-10x-Rep2
						Dry Weight
Name	RT	Area	Amount	Peak Area Percent	Unit	7.39319
2-Dog	7.24	1413.43	0.1	39.45	%w/v	% Dry Wt
Rhamnose			0		%w/v	0
Arabinose			0		%w/v	0
Galactose	13.41	33.8679	0.003187	0.95	%w/v	0.0431073
Glucose	14.52	1212.84	0.132031	33.85	%w/v	1.78585
Xylose			0		%w/v	0
Fructose	17.53	703.938	0.104379	19.65	%w/v	1.41183
Sucrose	22.29	218.481	0.072668	6.1	%w/v	0.982905
Cellobiose			0		%w/v	0
Galacturonic Acid			0		%w/v	0
			Sum	100
150C-2min-WE-R2-10x-Rep1
						Dry Weight
Name	RT	Area	Amount	Peak Area Percent	Unit	7.39319
2-Dog	7.24	1413.02	0.1	39.88	%w/v	% Dry Wt
Rhamnose			0		%w/v	0
Arabinose			0		%w/v	0
Galactose	13.44	32.964	0.003103	0.93	%w/v	0.0419711
Glucose	14.53	1200.06	0.130677	33.87	%w/v	1.76753
Xylose			0		%w/v	0
Fructose	17.49	687.718	0.102003	19.41	%w/v	1.37969
Sucrose	22.28	209.329	0.069644	5.91	%w/v	0.942003
Cellobiose			0		%w/v	0
Galacturonic Acid			0		%w/v	0
			Sum	100
150C-2min-WE-R2-10x-Rep2
						Dry Weight
Name	RT	Area	Amount	Peak Area Percent	Unit	7.39319
2-Dog	7.24	1415.43	0.1	39.79	%w/v	% Dry Wt
Rhamnose			0		%w/v	0
Arabinose			0		%w/v	0
Galactose	13.45	34.4299	0.003235	0.97	%w/v	0.0437565
Glucose	14.53	1192.54	0.129637	33.53	%w/v	1.75347
Xylose			0		%w/v	0
Fructose	17.54	709.706	0.105085	19.95	%w/v	1.42138
Sucrose	22.33	204.936	0.068066	5.76	%w/v	0.920659
Cellobiose			0		%w/v	0
Galacturonic Acid			0		%w/v	0
			Sum	100
150C-2min-WE-R3-10x-Rep1
						Dry Weight
Name	RT	Area	Amount	Peak Area Percent	Unit	7.39319
2-Dog	7.24	1408.61	0.1	41.47	%w/v	% Dry Wt
Rhamnose			0		%w/v	0
Arabinose			0		%w/v	0
Galactose	13.44	31.164	0.002943	0.92	%w/v	0.0398069
Glucose	14.53	1112.95	0.121571	32.77	%w/v	1.64437
Xylose			0		%w/v	0
Fructose	17.47	647.395	0.096323	19.06	%w/v	1.30286
Sucrose	22.26	196.351	0.065531	5.78	%w/v	0.88637
Cellobiose			0		%w/v	0
Galacturonic Acid			0		%w/v	0
			Sum	100
150C-2min-WE-R3-10x-Rep2
						Dry Weight
Name	RT	Area	Amount	Peak Area Percent	Unit	7.39319
2-Dog	7.23	1443.71	0.1	41.22	%w/v	% Dry Wt
Rhamnose			0		%w/v	0
Arabinose			0		%w/v	0
Galactose	13.4	36.45	0.003358	1.04	%w/v	0.0454202
Glucose	14.5	1160.86	0.123722	33.14	%w/v	1.67346
Xylose			0		%w/v	0
Fructose	17.47	659.697	0.095767	18.83	%w/v	1.29534
Sucrose	22.23	202.009	0.06578	5.77	%w/v	0.889738
Cellobiose			0		%w/v	0
Galacturonic Acid			0		%w/v	0
			Sum	100
150C-4m-WE-R1-10x-Rep1
						Dry Weight
Name	RT	Area	Amount	Peak Area Percent	Unit	5.21675
2-Dog	7.23	1995.96	0.1	43.97	%w/v	% Dry Wt
Rhamnose			0		%w/v	0
Arabinose			0		%w/v	0
Galactose	13.28	38.2869	0.002532	0.84	%w/v	0.048536
Glucose	14.36	1382.14	0.100017	30.45	%w/v	1.91723
Xylose			0		%w/v	0
Fructose	17.3	672.097	0.07773	14.81	%w/v	1.49001
Sucrose	22.13	450.831	0.101282	9.93	%w/v	1.94148
Cellobiose			0		%w/v	0
Galacturonic Acid			0		%w/v	0
			Sum	100
150C-4m-WE-R1-10x-Rep2
						Dry Weight
Name	RT	Area	Amount	Peak Area Percent	Unit	5.21675
2-Dog	7.24	1931.07	0.1	43.42	%w/v	% Dry Wt
Rhamnose			0		%w/v	0
Arabinose			0		%w/v	0
Galactose	13.32	36.6659	0.002506	0.82	%w/v	0.0480376
Glucose	14.39	1361.22	0.101814	30.61	%w/v	1.95167
Xylose			0		%w/v	0
Fructose	17.32	685.109	0.081898	15.41	%w/v	1.5699
Sucrose	22.14	433.125	0.100574	9.74	%w/v	1.9279
Cellobiose			0		%w/v	0
Galacturonic Acid			0		%w/v	0
			Sum	100
150C-4m-WE-R2-10x-Rep1
						Dry Weight
Name	RT	Area	Amount	Peak Area Percent	Unit	5.21675
2-Dog	7.23	1921.39	0.1	43.46	%w/v	% Dry Wt
Rhamnose			0		%w/v	0
Arabinose			0		%w/v	0
Galactose	13.31	38.4821	0.002643	0.87	%w/v	0.0506637
Glucose	14.36	1366.82	0.102748	30.92	%w/v	1.96958
Xylose			0		%w/v	0
Fructose	17.29	671.984	0.080734	15.2	%w/v	1.54759
Sucrose	22.14	422.404	0.098578	9.55	%w/v	1.88964
Cellobiose			0		%w/v	0
Galacturonic Acid			0		%w/v	0
			Sum	100
150C-4m-WE-R2-10x-Rep2
						Dry Weight
Name	RT	Area	Amount	Peak Area Percent	Unit	5.21675
2-Dog	7.24	1897.24	0.1	43.38	%w/v	% Dry Wt
Rhamnose			0		%w/v	0
Arabinose			0		%w/v	0
Galactose	13.33	34.2966	0.002386	0.78	%w/v	0.0457373
Glucose	14.36	1350.57	0.102818	30.88	%w/v	1.97092
Xylose			0		%w/v	0
Fructose	17.29	677.757	0.082464	15.5	%w/v	1.58075
Sucrose	22.14	413.984	0.097843	9.46	%w/v	1.87555
Cellobiose			0		%w/v	0
Galacturonic Acid			0		%w/v	0
			Sum	100
150C-4m-WE-R3-10x-Rep1
						Dry Weight
Name	RT	Area	Amount	Peak Area Percent	Unit	5.21675
2-Dog	7.24	1884.15	0.1	43.31	%w/v	% Dry Wt
Rhamnose			0		%w/v	0
Arabinose			0		%w/v	0
Galactose	13.29	37.0799	0.002597	0.85	%w/v	0.0497819
Glucose	14.37	1344.25	0.103048	30.9	%w/v	1.97533
Xylose			0		%w/v	0
Fructose	17.3	677.715	0.083031	15.58	%w/v	1.59162
Sucrose	22.15	406.732	0.096797	9.35	%w/v	1.8555
Cellobiose			0		%w/v	0
Galacturonic Acid			0		%w/v	0
			Sum	100
150C-4m-WE-R3-10x-Rep2
						Dry Weight
Name	RT	Area	Amount	Peak Area Percent	Unit	5.21675
2-Dog	7.24	1877.3	0.1	42.89	%w/v	% Dry Wt
Rhamnose			0		%w/v	0
Arabinose			0		%w/v	0
Galactose	13.28	35.6424	0.002506	0.81	%w/v	0.0480376
Glucose	14.35	1337.97	0.102941	30.57	%w/v	1.97328
Xylose			0		%w/v	0
Fructose	17.28	722.319	0.088819	16.5	%w/v	1.70257
Sucrose	22.15	403.504	0.096379	9.22	%w/v	1.84749
Cellobiose			0		%w/v	0
Galacturonic Acid			0		%w/v	0
			Sum	100
150C-8m-WE-R1-10x-Rep1
						Dry Weight
Name	RT	Area	Amount	Peak Area Percent	Unit	6.54118
2-Dog	7.21	2234.57	0.1	44.18	%w/v	% Dry Wt
Rhamnose			0		%w/v	0
Arabinose	10.06	32.1802	0.002146	0.64	%w/v	0.0328075
Galactose	13.4	54.3871	0.003278	1.08	%w/v	0.0501133
Glucose	14.46	1758.21	0.11758	34.76	%w/v	1.79754
Xylose			0		%w/v	0
Fructose	17.51	793.813	0.088921	15.7	%w/v	1.3594
Sucrose	22.23	184.285	0.032308	3.64	%w/v	0.493917
Cellobiose			0		%w/v	0
Galacturonic Acid			0		%w/v	0
			Sum	100
150C-8m-WE-R1-10x-Rep2
						Dry Weight
Name	RT	Area	Amount	Peak Area Percent	Unit	6.54118
2-Dog	7.21	2239.59	0.1	44.1	%w/v	% Dry Wt
Rhamnose			0		%w/v	0
Arabinose	10.06	32.954	0.002192	0.65	%w/v	0.0335108
Galactose	13.38	50.351	0.003028	0.99	%w/v	0.0462913
Glucose	14.45	1767.65	0.117946	34.81	%w/v	1.80313
Xylose			0		%w/v	0
Fructose	17.5	806.829	0.090177	15.89	%w/v	1.3786
Sucrose	22.2	180.958	0.031654	3.56	%w/v	0.483919
Cellobiose			0		%w/v	0
Galacturonic Acid			0		%w/v	0
			Sum	100
150C-8m-WE-R2-10x-Rep1
						Dry Weight
Name	RT	Area	Amount	Peak Area Percent	Unit	6.54118
2-Dog	7.21	2205.07	0.1	42.98	%w/v	% Dry Wt
Rhamnose			0		%w/v	0
Arabinose	10.05	35.6509	0.002409	0.69	%w/v	0.0368282
Galactose	13.39	55.6001	0.003396	1.08	%w/v	0.0519172
Glucose	14.46	1807.15	0.122469	35.22	%w/v	1.87228
Xylose			0		%w/v	0
Fructose	17.51	838.209	0.095151	16.34	%w/v	1.45465
Sucrose	22.21	188.702	0.033525	3.68	%w/v	0.512522
Cellobiose			0		%w/v	0
Galacturonic Acid			0		%w/v	0
			Sum	100
150C-8m-WE-R2-10x-Rep2
						Dry Weight
Name	RT	Area	Amount	Peak Area Percent	Unit	6.54118
2-Dog	7.21	2207.26	0.1	43.22	%w/v	% Dry Wt
Rhamnose			0		%w/v	0
Arabinose	10.07	29.8688	0.002016	0.58	%w/v	0.0308201
Galactose	13.4	51.4951	0.003142	1.01	%w/v	0.0480341
Glucose	14.46	1807.98	0.122404	35.4	%w/v	1.87128
Xylose			0		%w/v	0
Fructose	17.51	824.12	0.093458	16.14	%w/v	1.42876
Sucrose	22.22	186.42	0.033087	3.65	%w/v	0.505826
Cellobiose			0		%w/v	0
Galacturonic Acid			0		%w/v	0
			Sum	100
150C-8m-WE-R3-10x-Rep1
						Dry Weight
Name	RT	Area	Amount	Peak Area Percent	Unit	6.54118
2-Dog	7.21	2158.73	0.1	41.8	%w/v	% Dry Wt
Rhamnose			0		%w/v	0
Arabinose	10.05	35.9387	0.00248	0.7	%w/v	0.0379136
Galactose	13.38	60.4636	0.003772	1.17	%w/v	0.0576654
Glucose	14.45	1851.15	0.128144	35.85	%w/v	1.95903
Xylose			0		%w/v	0
Fructose	17.5	866.004	0.100416	16.77	%w/v	1.53514
Sucrose	22.2	191.901	0.034825	3.72	%w/v	0.532396
Cellobiose			0		%w/v	0
Galacturonic Acid			0		%w/v	0
			Sum	100
150C-8m-WE-R3-10x-Rep2
						Dry Weight
Name	RT	Area	Amount	Peak Area Percent	Unit	6.54118
2-Dog	7.21	2145.26	0.1	42.04	%w/v	% Dry Wt
Rhamnose			0		%w/v	0
Arabinose	10.06	34.3463	0.002385	0.67	%w/v	0.0364613
Galactose	13.38	49.4509	0.003104	0.97	%w/v	0.0474532
Glucose	14.46	1822.65	0.126963	35.72	%w/v	1.94098
Xylose			0		%w/v	0
Fructose	17.5	862.142	0.100596	16.89	%w/v	1.53789
Sucrose	22.22	189.191	0.034549	3.71	%w/v	0.528177
Cellobiose			0		%w/v	0
Galacturonic Acid			0		%w/v	0
			Sum	100
170C-1m-WE-R1-10x-Rep1
						Dry Weight
Name	RT	Area	Amount	Peak Area Percent	Unit	5.79598
2-Dog	7.25	1844.17	0.1	37.78	%w/v	% Dry Wt
Rhamnose			0		%w/v	0
Arabinose			0		%w/v	0
Galactose	13.32	35.1064	0.002512	0.72	%w/v	0.0433404
Glucose	14.38	1650.7	0.129284	33.81	%w/v	2.23058
Xylose			0		%w/v	0
Fructose	17.28	847.241	0.106052	17.35	%w/v	1.82975
Sucrose	22.15	504.706	0.122718	10.34	%w/v	2.1173
Cellobiose			0		%w/v	0
Galacturonic Acid			0		%w/v	0
			Sum	100
170C-1m-WE-R1-10x-Rep2
						Dry Weight
Name	RT	Area	Amount	Peak Area Percent	Unit	5.79598
2-Dog	7.24	1838.4	0.1	37.75	%w/v	% Dry Wt
Rhamnose			0		%w/v	0
Arabinose			0		%w/v	0
Galactose	13.28	33.2984	0.00239	0.68	%w/v	0.0412355
Glucose	14.35	1645.15	0.129253	33.78	%w/v	2.23005
Xylose			0		%w/v	0
Fructose	17.25	852.937	0.1071	17.51	%w/v	1.84783
Sucrose	22.15	500.636	0.12211	10.28	%w/v	2.10681
Cellobiose			0		%w/v	0
Galacturonic Acid			0		%w/v	0
			Sum	100
170C-1m-WE-R2-10x-Rep1
						Dry Weight
Name	RT	Area	Amount	Peak Area Percent	Unit	5.79598
2-Dog	7.24	1862.37	0.1	39.47	%w/v	% Dry Wt
Rhamnose			0		%w/v	0
Arabinose			0		%w/v	0
Galactose	13.31	33.1387	0.002348	0.7	%w/v	0.0405109
Glucose	14.36	1558.34	0.120857	33.03	%w/v	2.08519
Xylose			0		%w/v	0
Fructose	17.23	797.204	0.098813	16.9	%w/v	1.70485
Sucrose	22.13	467.346	0.112523	9.9	%w/v	1.9414
Cellobiose			0		%w/v	0
Galacturonic Acid			0		%w/v	0
			Sum	100
170C-1m-WE-R2-10x-Rep2
						Dry Weight
Name	RT	Area	Amount	Peak Area Percent	Unit	5.79598
2-Dog	7.25	1932.1	0.1	39.01	%w/v	% Dry Wt
Rhamnose			0		%w/v	0
Arabinose			0		%w/v	0
Galactose	13.34	32.139	0.002195	0.65	%w/v	0.0378711
Glucose	14.39	1631.86	0.121991	32.95	%w/v	2.10475
Xylose			0		%w/v	0
Fructose	17.35	834.72	0.099729	16.85	%w/v	1.72066
Sucrose	22.17	522.379	0.121234	10.55	%w/v	2.09169
Cellobiose			0		%w/v	0
Galacturonic Acid			0		%w/v	0
			Sum	100
170C-1m-WE-R3-10x-Rep1
						Dry Weight
Name	RT	Area	Amount	Peak Area Percent	Unit	5.79598
2-Dog	7.24	1868.05	0.1	37.24	%w/v	% Dry Wt
Rhamnose			0		%w/v	0
Arabinose			0		%w/v	0
Galactose	13.31	33.898	0.002395	0.68	%w/v	0.0413218
Glucose	14.38	1699.61	0.131413	33.88	%w/v	2.26731
Xylose			0		%w/v	0
Fructose	17.3	885.486	0.109422	17.65	%w/v	1.8879
Sucrose	22.16	528.986	0.126977	10.55	%w/v	2.19078
Cellobiose			0		%w/v	0
Galacturonic Acid			0		%w/v	0
			Sum	100
170C-1m-WE-R3-10x-Rep2
						Dry Weight
Name	RT	Area	Amount	Peak Area Percent	Unit	5.79598
2-Dog	7.24	1845.09	0.1	37.37	%w/v	% Dry Wt
Rhamnose			0		%w/v	0
Arabinose			0		%w/v	0
Galactose	13.3	33.6223	0.002405	0.68	%w/v	0.0414943
Glucose	14.37	1672.38	0.130917	33.87	%w/v	2.25876
Xylose			0		%w/v	0
Fructose	17.29	879.21	0.109999	17.81	%w/v	1.89785
Sucrose	22.15	507.003	0.123215	10.27	%w/v	2.12587
Cellobiose			0		%w/v	0
Galacturonic Acid			0		%w/v	0
			Sum	100
170C-2m-WE-R1-10x-Rep1
						Dry Weight
Name	RT	Area	Amount	Peak Area Percent	Unit	6.87059
2-Dog	7.29	1714.92	0.1	43.7	%w/v	% Dry Wt
Rhamnose			0		%w/v	0
Arabinose	10.07	26.6686	0.001929	0.68	%w/v	0.0280762
Galactose	13.43	39.7611	0.002989	1.01	%w/v	0.0435043
Glucose	14.53	1362.58	0.111553	34.72	%w/v	1.62363
Xylose			0		%w/v	0
Fructose	17.44	622.888	0.08022	15.87	%w/v	1.16759
Sucrose	22.24	157.545	0.041898	4.01	%w/v	0.609817
Cellobiose			0		%w/v	0
Galacturonic Acid			0		%w/v	0
			Sum	100
170C-2m-WE-R1-10x-Rep2
						Dry Weight
Name	RT	Area	Amount	Peak Area Percent	Unit	6.87059
2-Dog	7.29	1716.2	0.1	43.58	%w/v	% Dry Wt
Rhamnose			0		%w/v	0
Arabinose	10.07	27.438	0.001983	0.7	%w/v	0.0288622
Galactose	13.41	39.1217	0.002938	0.99	%w/v	0.042762
Glucose	14.52	1365.97	0.111748	34.69	%w/v	1.62647
Xylose			0		%w/v	0
Fructose	17.43	628.644	0.080902	15.96	%w/v	1.17751
Sucrose	22.25	160.732	0.042714	4.08	%w/v	0.621693
Cellobiose			0		%w/v	0
Galacturonic Acid			0		%w/v	0
			Sum	100
170C-2m-WE-R2-10x-Rep1
						Dry Weight
Name	RT	Area	Amount	Peak Area Percent	Unit	6.87059
2-Dog	7.3	1712.32	0.1	41.41	%w/v	% Dry Wt
Rhamnose			0		%w/v	0
Arabinose	10.09	27.5491	0.001996	0.67	%w/v	0.0290514
Galactose	13.44	41.057	0.003091	0.99	%w/v	0.0449889
Glucose	14.55	1467.54	0.120329	35.49	%w/v	1.75136
Xylose			0		%w/v	0
Fructose	17.44	715.062	0.092231	17.29	%w/v	1.3424
Sucrose	22.26	171.077	0.045566	4.14	%w/v	0.663204
Cellobiose			0		%w/v	0
Galacturonic Acid			0		%w/v	0
			Sum	100
170C-2m-WE-R2-10x-Rep2
						Dry Weight
Name	RT	Area	Amount	Peak Area Percent	Unit	6.87059
2-Dog	7.29	1714.99	0.1	41.41	%w/v	% Dry Wt
Rhamnose			0		%w/v	0
Arabinose	10.07	27.2216	0.001969	0.66	%w/v	0.0286584
Galactose	13.42	40.383	0.003035	0.98	%w/v	0.0441738
Glucose	14.53	1465.68	0.119989	35.39	%w/v	1.74642
Xylose			0		%w/v	0
Fructose	17.43	714.296	0.091989	17.25	%w/v	1.33888
Sucrose	22.25	178.822	0.047554	4.32	%w/v	0.692139
Cellobiose			0		%w/v	0
Galacturonic Acid			0		%w/v	0
			Sum	100
170C-2m-WE-R3-10x-Rep1
						Dry Weight
Name	RT	Area	Amount	Peak Area Percent	Unit	6.87059
2-Dog	7.29	1764.73	0.1	44.88	%w/v	% Dry Wt
Rhamnose			0		%w/v	0
Arabinose	10.06	28.5486	0.002007	0.73	%w/v	0.0292115
Galactose	13.42	41.5416	0.003034	1.06	%w/v	0.0441592
Glucose	14.51	1317.62	0.104827	33.51	%w/v	1.52574
Xylose			0		%w/v	0
Fructose	17.43	618.721	0.077435	15.73	%w/v	1.12705
Sucrose	22.25	161.326	0.041693	4.1	%w/v	0.606833
Cellobiose			0		%w/v	0
Galacturonic Acid			0		%w/v	0
			Sum	100
170C-2m-WE-R3-10x-Rep2
						Dry Weight
Name	RT	Area	Amount	Peak Area Percent	Unit	6.87059
2-Dog	7.29	1764.06	0.1	44.83	%w/v	% Dry Wt
Rhamnose			0		%w/v	0
Arabinose	10.07	24.9911	0.001758	0.64	%w/v	0.0255873
Galactose	13.4	40.4797	0.002958	1.03	%w/v	0.0430531
Glucose	14.52	1313.01	0.1045	33.37	%w/v	1.52098
Xylose			0		%w/v	0
Fructose	17.43	619.599	0.077574	15.75	%w/v	1.12907
Sucrose	22.25	172.954	0.044714	4.4	%w/v	0.650803
Cellobiose			0		%w/v	0
Galacturonic Acid			0		%w/v	0
			Sum	100
1-22-21-170C-4m-WE-R1-10x-Rep1
						Dry Weight
Name	RT	Area	Amount	Peak Area Percent	Unit	3.45436
2-Dog	7.21	1541.93	0.1	63.55	%w/v	% Dry Wt
Rhamnose			0		%w/v	0
Arabinose	10.07	13.0255	0.000921	0.54	%w/v	0.026662
Galactose	13.39	25.7882	0.002102	1.06	%w/v	0.0608506
Glucose	14.47	646.67	0.058763	26.65	%w/v	1.70113
Xylose			0		%w/v	0
Fructose	17.72	198.749	0.025341	8.19	%w/v	0.733595
Sucrose			0		%w/v	0
Cellobiose			0		%w/v	0
Galacturonic Acid			0		%w/v	0
			Sum	100
1-22-21-170C-4m-WE-R1-10x-Rep2
						Dry Weight
Name	RT	Area	Amount	Peak Area Percent	Unit	3.45436
2-Dog	7.21	1530.7	0.1	63.9	%w/v	% Dry Wt
Rhamnose			0		%w/v	0
Arabinose	10.04	11.2921	0.000804	0.47	%w/v	0.0232749
Galactose	13.38	24.0801	0.001977	1.01	%w/v	0.057232
Glucose	14.47	639.865	0.058571	26.71	%w/v	1.69557
Xylose			0		%w/v	0
Fructose	17.67	189.689	0.024363	7.92	%w/v	0.705283
Sucrose			0		%w/v	0
Cellobiose			0		%w/v	0
Galacturonic Acid			0		%w/v	0
			Sum	100
1-22-21-170C-4m-WE-R2-10x-Rep1
						Dry Weight
Name	RT	Area	Amount	Peak Area Percent	Unit	3.45436
2-Dog	7.22	1578.59	0.1	63.04	%w/v	% Dry Wt
Rhamnose			0		%w/v	0
Arabinose	10.07	13.1596	0.000909	0.53	%w/v	0.0263146
Galactose	13.41	24.8231	0.001976	0.99	%w/v	0.0572031
Glucose	14.48	692.418	0.061459	27.65	%w/v	1.77917
Xylose			0		%w/v	0
Fructose	17.64	195.163	0.024306	7.79	%w/v	0.703633
Sucrose			0		%w/v	0
Cellobiose			0		%w/v	0
Galacturonic Acid			0		%w/v	0
			Sum	100
1-22-21-170C-4m-WE-R2-10x-Rep2
						Dry Weight
Name	RT	Area	Amount	Peak Area Percent	Unit	3.45436
2-Dog	7.22	1583.02	0.1	62.87	%w/v	% Dry Wt
Rhamnose			0		%w/v	0
Arabinose	10.07	13.5663	0.000934	0.54	%w/v	0.0270383
Galactose	13.39	22.6517	0.001798	0.9	%w/v	0.0520502
Glucose	14.48	697.322	0.061721	27.7	%w/v	1.78676
Xylose			0		%w/v	0
Fructose	17.62	201.213	0.024989	7.99	%w/v	0.723405
Sucrose			0		%w/v	0
Cellobiose			0		%w/v	0
Galacturonic Acid			0		%w/v	0
			Sum	100
1-22-21-170C-4m-WE-R3-10x-Rep1
						Dry Weight
Name	RT	Area	Amount	Peak Area Percent	Unit	3.45436
2-Dog	7.22	1571.8	0.1	63.36	%w/v	% Dry Wt
Rhamnose			0		%w/v	0
Arabinose	10.09	11.4673	0.000795	0.46	%w/v	0.0230144
Galactose	13.4	27.0142	0.00216	1.09	%w/v	0.0625297
Glucose	14.48	668.335	0.059577	26.94	%w/v	1.72469
Xylose			0		%w/v	0
Fructose	17.62	202.092	0.025277	8.15	%w/v	0.731742
Sucrose			0		%w/v	0
Cellobiose			0		%w/v	0
Galacturonic Acid			0		%w/v	0
			Sum	100
1-22-21-170C-4m-WE-R3-10x-Rep2
						Dry Weight
Name	RT	Area	Amount	Peak Area Percent	Unit	3.45436
2-Dog	7.22	1566.51	0.1	63.1	%w/v	% Dry Wt
Rhamnose			0		%w/v	0
Arabinose	10.09	13.0655	0.000909	0.53	%w/v	0.0263146
Galactose	13.42	22.2399	0.001784	0.9	%w/v	0.0516449
Glucose	14.49	674.753	0.060353	27.18	%w/v	1.74715
Xylose			0		%w/v	0
Fructose	17.62	205.844	0.025834	8.29	%w/v	0.747867
Sucrose			0		%w/v	0
Cellobiose			0		%w/v	0
Galacturonic Acid			0		%w/v	0
			Sum	100
170C-8min-WE-R1-10x-Rep1
						Dry Weight
Name	RT	Area	Amount	Peak Area Percent	Unit	2.1008
2-Dog	7.31	1637.22	0.1	86.03	%w/v	% Dry Wt
Rhamnose			0		%w/v	0
Arabinose	10.12	16.6606	0.001119	0.88	%w/v	0.0532654
Galactose	13.46	29.2205	0.002222	1.54	%w/v	0.105769
Glucose	14.59	219.96	0.018876	11.56	%w/v	0.898515
Xylose			0		%w/v	0
Fructose			0		%w/v	0
Sucrose			0		%w/v	0
Cellobiose			0		%w/v	0
Galacturonic Acid			0		%w/v	0
			Sum	100
170C-8min-WE-R1-10x-Rep2
						Dry Weight
Name	RT	Area	Amount	Peak Area Percent	Unit	2.1008
2-Dog	7.31	1675.1	0.1	86.06	%w/v	% Dry Wt
Rhamnose			0		%w/v	0
Arabinose	10.1	17.2055	0.001129	0.88	%w/v	0.0537414
Galactose	13.45	23.6343	0.001756	1.21	%w/v	0.0835872
Glucose	14.59	230.407	0.019325	11.84	%w/v	0.919887
Xylose			0		%w/v	0
Fructose			0		%w/v	0
Sucrose			0		%w/v	0
Cellobiose			0		%w/v	0
Galacturonic Acid			0		%w/v	0
			Sum	100
170C-8min-WE-R2-10x-Rep1
						Dry Weight
Name	RT	Area	Amount	Peak Area Percent	Unit	2.1008
2-Dog	7.31	1671.02	0.1	85.64	%w/v	% Dry Wt
Rhamnose			0		%w/v	0
Arabinose	10.1	14.9207	0.000981	0.76	%w/v	0.0466965
Galactose	13.49	26.0742	0.001943	1.34	%w/v	0.0924885
Glucose	14.58	239.282	0.020119	12.26	%w/v	0.957682
Xylose			0		%w/v	0
Fructose			0		%w/v	0
Sucrose			0		%w/v	0
Cellobiose			0		%w/v	0
Galacturonic Acid			0		%w/v	0
			Sum	100
170C-8min-WE-R2-10x-Rep2
						Dry Weight
Name	RT	Area	Amount	Peak Area Percent	Unit	2.1008
2-Dog	7.31	1660.45	0.1	85.63	%w/v	% Dry Wt
Rhamnose			0		%w/v	0
Arabinose	10.11	17.2486	0.001142	0.89	%w/v	0.0543602
Galactose	13.48	27.5908	0.002069	1.42	%w/v	0.0984863
Glucose	14.59	233.801	0.019783	12.06	%w/v	0.941689
Xylose			0		%w/v	0
Fructose			0		%w/v	0
Sucrose			0		%w/v	0
Cellobiose			0		%w/v	0
Galacturonic Acid			0		%w/v	0
			Sum	100
170C-8min-WE-R3-10x-Rep1
						Dry Weight
Name	RT	Area	Amount	Peak Area Percent	Unit	2.1008
2-Dog	7.31	1656.91	0.1	85.45	%w/v	% Dry Wt
Rhamnose			0		%w/v	0
Arabinose	10.1	17.5351	0.001163	0.9	%w/v	0.0553598
Galactose	13.5	26.3353	0.001979	1.36	%w/v	0.0942022
Glucose	14.58	238.332	0.02021	12.29	%w/v	0.962014
Xylose			0		%w/v	0
Fructose			0		%w/v	0
Sucrose			0		%w/v	0
Cellobiose			0		%w/v	0
Galacturonic Acid			0		%w/v	0
			Sum	100
170C-8min-WE-R3-10x-Rep2
						Dry Weight
Name	RT	Area	Amount	Peak Area Percent	Unit	2.1008
2-Dog	7.31	1652.94	0.1	85.48	%w/v	% Dry Wt
Rhamnose			0		%w/v	0
Arabinose	10.11	17.8565	0.001187	0.92	%w/v	0.0565023
Galactose	13.51	25.3892	0.001912	1.31	%w/v	0.0910129
Glucose	14.58	237.423	0.020181	12.28	%w/v	0.960634
Xylose			0		%w/v	0
Fructose			0		%w/v	0
Sucrose			0		%w/v	0
Cellobiose			0		%w/v	0
Galacturonic Acid			0		%w/v	0
			Sum	100

## Sheet: Compositional Sugar
	Treatment	Rhamnose	SD	RSD	Arabinose	SD2	RSD3	Galactose	SD4	RSD5	Glucose	SD6	RSD7	Xylose	SD8	RSD9	Fructose	SD10	RSD11	Sucrose	SD12	RSD13	Cellobiose	SD14	RSD15	Galacturonic Acid	SD16	RSD17	Treatment2		R,A,G,Gl,X,F,S,C total	St Dev	RSD
	12/11/20 Raw	1.66819	0.0998126	5.98329	5.11237	0.169545	3.31637	3.03461	0.145352	4.78982	16.8613	1.44517	8.57092	1.47941	0.07913	5.34875	11.9861	0.652196	5.44126	0	0	#DIV/0!	0	0	#DIV/0!	16.8692	0.656278	3.8904	12/11/20 Raw		40.142	2.56517	6.39024
	1/12/21 Raw	1.47752	0.056228	3.80556	5.66729	0.253443	4.47204	2.74126	0.109026	3.97721	16.3635	1.43326	8.75891	1.46858	0.0931735	6.34447	8.43446	0.655871	7.77608	0	0	#DIV/0!	0	0	#DIV/0!	16.3873	0.753289	4.59679	1/12/21 Raw		36.1526	2.5466	7.04403
	1/22/21 Raw	1.5905	0.0336987	2.11875	4.47198	0.0792199	1.77147	2.33745	0.0199587	0.853867	14.6773	1.42203	9.68867	1.42112	0.111442	7.84184	10.4867	0.677121	6.45697	0	0	#DIV/0!	0	0	#DIV/0!	14.8894	0.624651	4.19527	1/22/21 Raw		34.985	2.15764	6.16732
	2/3/21 Raw	1.24389	0.0127732	1.02688	4.64983	0.112407	2.41745	2.36301	0.0651221	2.7559	13.4476	0.379042	2.81867	1.31471	0.0411424	3.12938	9.38082	0.322111	3.43372	0	0	#DIV/0!	0	0	#DIV/0!	14.5455	0.305875	2.10288	2/3/21 Raw		32.3998	0.69615	2.14862
	2/19/21 Raw	1.36389	0.0430728	3.15809	5.82536	0.186714	3.20519	2.4973	0.0807205	3.23231	13.254	1.13732	8.58091	1.44851	0.01405	0.969966	6.48584	0.142172	2.19203	0	0	#DIV/0!	0	0	#DIV/0!	18.2582	0.824713	4.51695	2/19/21 Raw		30.8749	1.59501	5.16604
	3/5/21 Raw	1.32821	0.0863202	6.49897	5.88504	0.245892	4.17826	3.15319	0.140783	4.46477	12.9585	1.1237	8.67151	1.4234	0.0481537	3.38301	8.03014	0.185807	2.31387	0	0	#DIV/0!	0	0	#DIV/0!	16.3562	0.741207	4.53167	3/5/21 Raw		32.7785	1.79608	5.47944
	130°C 1min	1.84345	0.0624062	3.3853	7.05105	0.0880031	1.24809	3.77224	0.094664	2.50949	17.0557	1.12421	6.59138	2.26424	0.0924201	4.08173	2.89689	0.140654	4.85535	0	0	#DIV/0!	0	0	#DIV/0!	29.1077	0.48968	1.68231	130°C 1min		34.8836	1.50593	4.31703
	130°C 2min	1.8683	0.105779	5.66175	5.88423	0.0985547	1.67489	3.33239	0.138289	4.14986	13.5427	1.06321	7.85085	2.15595	0.0542393	2.5158	2.11992	0.123631	5.83185	0	0	#DIV/0!	0	0	#DIV/0!	27.8672	0.586809	2.10573	130°C 2min		28.9035	1.37112	4.7438
	130°C 4min	1.82012	0.0809598	4.44804	7.60847	0.275444	3.62022	4.33744	0.205995	4.74923	25.0676	2.22312	8.8685	2.53029	0.0820748	3.24369	3.98172	0.310664	7.80227	0	0	#DIV/0!	0	0	#DIV/0!	26.6668	1.16905	4.38389	130°C 4min		45.3456	2.93581	6.47429
	130°C 8min	1.6765	0.0167412	0.99858	9.57608	0.240664	2.51318	4.82845	0.201357	4.17023	18.098	0.54677	3.02116	2.65133	0.143941	5.42902	2.32885	0.199591	8.57035	0	0	#DIV/0!	0	0	#DIV/0!	33.9549	1.10754	3.26179	130°C 8min		39.1592	0.911714	2.32822
	150°C 1min	1.46193	0.0424065	2.90072	8.35499	0.217892	2.60793	4.17949	0.103434	2.4748	11.18	0.955816	8.54934	2.40933	0.116503	4.83551	1.78242	0.0806909	4.52705	0	0	#DIV/0!	0	0	#DIV/0!	28.1338	0.866506	3.07995	150°C 1min		29.3682	1.46672	4.99425
	150°C 2min	1.64501	0.0360051	2.18874	7.82205	0.0850224	1.08696	4.03854	0.06712	1.66198	18.2028	1.30199	7.15267	2.91317	0.0887109	3.04516	1.96084	0.129718	6.61542	0	0	#DIV/0!	0	0	#DIV/0!	27.1997	0.355657	1.30758	150°C 2min		36.5824	1.42222	3.8877
	150°C 4min	1.70938	0.105983	6.20009	6.67391	0.0140786	0.210949	3.84413	0.048158	1.25277	34.5184	1.02394	2.96637	3.31733	0.0727378	2.19266	3.17993	0.306582	9.64116	0	0	#DIV/0!	0	0	#DIV/0!	20.7217	0.0995158	0.48025	150°C 4min		53.2431	1.08526	2.03832
	150°C 8min	1.96225	0.160496	8.17919	6.05671	0.0387992	0.640599	4.47086	0.115305	2.57903	28.9797	0.479168	1.65346	3.19188	0.153103	4.79666	2.46936	0.0313166	1.26821	0	0	#DIV/0!	0	0	#DIV/0!	22.0854	0.10628	0.481221	150°C 8min		47.1307	0.766153	1.62559
	170°C 1min	2.00359	0.0953739	4.76015	7.81372	0.0945259	1.20974	4.39949	0.103808	2.35955	25.0842	1.55488	6.19863	3.31456	0.185055	5.58308	3.23406	0.209963	6.49226	0	0	#DIV/0!	0	0	#DIV/0!	21.8193	0.320165	1.46735	170°C 1min		45.8496	1.77349	3.86806
	170°C 2min	1.55751	0.0766	4.9181	6.12884	0.136806	2.23217	4.51254	0.123476	2.73629	27.5917	1.62939	5.90535	3.51737	0.0825058	2.34567	2.12091	0.118557	5.58992	0	0	#DIV/0!	0	0	#DIV/0!	22.5748	0.925435	4.09941	170°C 2min		45.4289	2.01167	4.42818
	170°C 4min	2.45201	0.0550761	2.24616	4.40032	0.0319142	0.725268	5.571	0.134606	2.4162	44.8993	0.86321	1.92255	4.7988	0.21281	4.43465	3.66223	0.0246777	0.673843	0	0	#DIV/0!	0	0	#DIV/0!	13.2564	0.267373	2.01693	170°C 4min		65.7837	0.900229	1.36847
	170°C 8min	0.524245	0.0392601	7.4889	2.03075	0.035426	1.74448	4.65851	0.162815	3.495	26.4201	1.54011	5.82931	4.5267	0.152579	3.37065	-0.278822	0.272843	-97.8556	0	0	#DIV/0!	0	0	#DIV/0!	6.89121	0.241301	3.50158	170°C 8min		37.8815	1.61139	4.25377
	CitraFiber	1.44314	0.0418942	2.90299	10.2303	0.318972	3.1179	5.33179	0.220867	4.14246	18.0675	1.17461	6.50125	2.36995	0.157712	6.65464	0.177832	0.0105055	5.90753	0	0	#DIV/0!	0	0	#DIV/0!	33.0024	1.23309	3.73636	CitraFiber		37.6206	1.87765	4.99101
	CE OR	1.31742	0.0351192	2.66575	6.40689	0.0415493	0.64851	3.03872	0.00557993	0.183628	14.7795	0.403318	2.7289	1.59026	0.0485584	3.05348	8.6412	0.112362	1.3003	0	0	#DIV/0!	0	0	#DIV/0!	18.9953	0.0646348	0.340267	CE OR		35.774	0.572345	1.59989
	CE LN	1.04458	0.0418942	4.01061	10.2303	0.318972	3.1179	5.33179	0.220867	4.14246	18.0675	1.17461	6.50125	2.36995	0.157712	6.65464	0.177832	0.0105055	5.90753	0	0	#DIV/0!	0	0	#DIV/0!	28.1576	1.23309	4.37924	CE LN		29.7487	0.943013	3.16993

## Sheet: Comp Sugar Chromatograms
Compositional Sugars Fiber Samples
12-11-20-Raw-Hyd-R1-200x-Rep1
						Dry Weight
Name	RT	Area	Amount	Peak Area Percent	Unit	22.2
2-Dog	7.14	1799.73	2	12.88	%w/v	% Dry Wt
Rhamnose	8.48	150.531	0.394777	1.08	%w/v	1.77827
Arabinose	9.87	967.746	1.17464	6.93	%w/v	5.29116
Galactose	13.16	601.85	0.798063	4.31	%w/v	3.19299
Glucose	14.16	7003.79	10.1318	50.13	%w/v	18.356
Xylose	15.63	283.896	0.348507	2.03	%w/v	1.56985
Fructose	17.2	1176.03	3.03189	8.42	%w/v	12.7323
Sucrose			0		%w/v	0
Cellobiose			0		%w/v	0
Galacturonic Acid	33.41	1986.45	3.8819	14.22	%w/v	17.486
			Sum	100
12-11-20-Raw-Hyd-R1-200x-Rep2
						Dry Weight
Name	RT	Area	Amount	Peak Area Percent	Unit	22.2
2-Dog	7.17	1780.78	2	12.88	%w/v	% Dry Wt
Rhamnose	8.51	147.686	0.391439	1.07	%w/v	1.76324
Arabinose	9.9	960.279	1.17798	6.95	%w/v	5.30622
Galactose	13.21	593.151	0.794899	4.29	%w/v	3.17874
Glucose	14.22	6985.74	10.2133	50.53	%w/v	18.7229
Xylose	15.68	275.089	0.34129	1.99	%w/v	1.53734
Fructose	17.24	1110.62	2.89372	8.03	%w/v	12.1099
Sucrose			0		%w/v	0
Cellobiose			0		%w/v	0
Galacturonic Acid	33.41	1971.13	3.89295	14.26	%w/v	17.5358
			Sum	100
12-11-20-Raw-Hyd-R2-200x-Rep1
						Dry Weight
Name	RT	Area	Amount	Peak Area Percent	Unit	22.2
2-Dog	7.17	1732.31	2	13.36	%w/v	% Dry Wt
Rhamnose	8.51	133.844	0.364678	1.03	%w/v	1.64269
Arabinose	9.9	896.436	1.13043	6.91	%w/v	5.09204
Galactose	13.21	548.774	0.756006	4.23	%w/v	3.00354
Glucose	14.23	6505.14	9.77673	50.17	%w/v	16.7565
Xylose	15.68	251.605	0.32089	1.94	%w/v	1.44545
Fructose	17.24	1046.5	2.80294	8.07	%w/v	11.701
Sucrose			0		%w/v	0
Cellobiose			0		%w/v	0
Galacturonic Acid	33.41	1852.54	3.76111	14.29	%w/v	16.9419
			Sum	100
12-11-20-Raw-Hyd-R2-200x-Rep2
						Dry Weight
Name	RT	Area	Amount	Peak Area Percent	Unit	22.2
2-Dog	7.16	1739.79	2	13.39	%w/v	% Dry Wt
Rhamnose	8.5	132.322	0.35898	1.02	%w/v	1.61703
Arabinose	9.89	898.949	1.12873	6.92	%w/v	5.08436
Galactose	13.19	536.209	0.735519	4.13	%w/v	2.91126
Glucose	14.2	6534.77	9.77903	50.31	%w/v	16.7669
Xylose	15.66	258.258	0.327959	1.99	%w/v	1.47729
Fructose	17.23	1052.55	2.80702	8.1	%w/v	11.7194
Sucrose			0		%w/v	0
Cellobiose			0		%w/v	0
Galacturonic Acid	33.39	1835.92	3.71135	14.13	%w/v	16.7178
			Sum	100
12-11-20-Raw-Hyd-R3-200x-Rep1
						Dry Weight
Name	RT	Area	Amount	Peak Area Percent	Unit	22.2
2-Dog	7.14	1783.51	2	13.71	%w/v	% Dry Wt
Rhamnose	8.49	132.843	0.351558	1.02	%w/v	1.58359
Arabinose	9.88	897.892	1.09977	6.9	%w/v	4.95391
Galactose	13.17	549.027	0.734642	4.22	%w/v	2.90731
Glucose	14.18	6501.96	9.49143	50	%w/v	15.4714
Xylose	15.64	255.005	0.31589	1.96	%w/v	1.42293
Fructose	17.21	1062.4	2.76386	8.17	%w/v	11.525
Sucrose			0		%w/v	0
Cellobiose			0		%w/v	0
Galacturonic Acid	33.39	1821.46	3.59186	14.01	%w/v	16.1795
			Sum	100
12-11-20-Raw-Hyd-R3-200x-Rep2
						Dry Weight
Name	RT	Area	Amount	Peak Area Percent	Unit	22.2
2-Dog	7.15	1792.41	2	13.73	%w/v	% Dry Wt
Rhamnose	8.5	134.051	0.352993	1.03	%w/v	1.59006
Arabinose	9.89	899.873	1.09672	6.89	%w/v	4.94016
Galactose	13.2	556.285	0.740654	4.26	%w/v	2.93439
Glucose	14.21	6544.89	9.50662	50.12	%w/v	15.5398
Xylose	15.67	254.978	0.314286	1.95	%w/v	1.4157
Fructose	17.24	1061.09	2.74672	8.13	%w/v	11.4478
Sucrose			0		%w/v	0
Cellobiose			0		%w/v	0
Galacturonic Acid	33.39	1814.82	3.56098	13.9	%w/v	16.0404
			Sum	100
1-12-21-Raw-Hyd-R1-200x-Rep1
						Dry Weight
Name	RT	Area	Amount	Peak Area Percent	Unit	19.65
2-Dog	7.41	1453.11	2	14.09	%w/v	% Dry Wt
Rhamnose	8.75	92.9	0.288321	0.9	%w/v	1.46728
Arabinose	10.18	792.813	1.15665	7.69	%w/v	5.88628
Galactose	13.62	413.171	0.64428	4.01	%w/v	2.83568
Glucose	14.68	5374.92	8.81797	52.12	%w/v	17.5129
Xylose	16.06	217.562	0.299053	2.11	%w/v	1.5219
Fructose	17.55	809.478	1.97906	7.85	%w/v	9.10546
Sucrose			0		%w/v	0
Cellobiose			0		%w/v	0
Galacturonic Acid	33.45	1159.22	3.3339	11.24	%w/v	16.9664
			Sum	100
1-12-21-Raw-Hyd-R1-200x-Rep2
						Dry Weight
Name	RT	Area	Amount	Peak Area Percent	Unit	19.65
2-Dog	7.42	1463.19	2	14.14	%w/v	% Dry Wt
Rhamnose	8.76	94.8538	0.292357	0.92	%w/v	1.48782
Arabinose	10.2	794.551	1.15121	7.68	%w/v	5.85855
Galactose	13.65	419.886	0.650239	4.06	%w/v	2.86601
Glucose	14.71	5413.16	8.81954	52.32	%w/v	17.5209
Xylose	16.09	211.26	0.288389	2.04	%w/v	1.46763
Fructose	17.57	770.981	1.87195	7.45	%w/v	8.5604
Sucrose			0		%w/v	0
Cellobiose			0		%w/v	0
Galacturonic Acid	33.45	1178.93	3.36722	11.39	%w/v	17.136
			Sum	100
1-12-21-Raw-Hyd-R2-200x-Rep1
						Dry Weight
Name	RT	Area	Amount	Peak Area Percent	Unit	19.65
2-Dog	7.43	1491.14	2	14.35	%w/v	% Dry Wt
Rhamnose	8.76	99.9372	0.30225	0.96	%w/v	1.53817
Arabinose	10.21	791.399	1.12514	7.62	%w/v	5.72592
Galactose	13.67	414.995	0.630617	3.99	%w/v	2.76615
Glucose	14.72	5430.43	8.68181	52.26	%w/v	16.82
Xylose	16.1	223.396	0.299239	2.15	%w/v	1.52284
Fructose	17.58	772.737	1.84104	7.44	%w/v	8.40309
Sucrose			0		%w/v	0
Cellobiose			0		%w/v	0
Galacturonic Acid	33.45	1168.07	3.27365	11.24	%w/v	16.6598
			Sum	100
1-12-21-Raw-Hyd-R2-200x-Rep2
						Dry Weight
Name	RT	Area	Amount	Peak Area Percent	Unit	19.65
2-Dog	7.43	1499.24	2	14.36	%w/v	% Dry Wt
Rhamnose	8.77	103.769	0.312145	0.99	%w/v	1.58852
Arabinose	10.21	794.725	1.12377	7.61	%w/v	5.71893
Galactose	13.67	414.845	0.626985	3.97	%w/v	2.74767
Glucose	14.73	5457.02	8.6772	52.29	%w/v	16.7965
Xylose	16.1	214.945	0.286363	2.06	%w/v	1.45732
Fructose	17.59	779.235	1.8465	7.47	%w/v	8.43085
Sucrose			0		%w/v	0
Cellobiose			0		%w/v	0
Galacturonic Acid	33.46	1173.03	3.26982	11.24	%w/v	16.6403
			Sum	100
1-12-21-Raw-Hyd-R3-200x-Rep1
						Dry Weight
Name	RT	Area	Amount	Peak Area Percent	Unit	19.65
2-Dog	7.42	1523.83	2	15.04	%w/v	% Dry Wt
Rhamnose	8.76	94.7545	0.280429	0.94	%w/v	1.42712
Arabinose	10.2	761.255	1.05907	7.51	%w/v	5.38967
Galactose	13.65	405.034	0.602279	4	%w/v	2.62194
Glucose	14.72	5290.42	8.27655	52.22	%w/v	14.7576
Xylose	16.09	204.029	0.267435	2.01	%w/v	1.36099
Fructose	17.58	738.409	1.72152	7.29	%w/v	7.79484
Sucrose			0		%w/v	0
Cellobiose			0		%w/v	0
Galacturonic Acid	33.46	1113.13	3.05276	10.99	%w/v	15.5357
			Sum	100
1-12-21-Raw-Hyd-R3-200x-Rep2
						Dry Weight
Name	RT	Area	Amount	Peak Area Percent	Unit	19.65
2-Dog	7.41	1523.01	2	14.96	%w/v	% Dry Wt
Rhamnose	8.76	95.1366	0.281712	0.93	%w/v	1.43365
Arabinose	10.2	759.755	1.05756	7.46	%w/v	5.38196
Galactose	13.65	403.384	0.600149	3.96	%w/v	2.6111
Glucose	14.71	5299.33	8.29497	52.04	%w/v	14.8513
Xylose	16.08	209.522	0.274783	2.06	%w/v	1.39839
Fructose	17.57	767.724	1.79083	7.54	%w/v	8.14757
Sucrose			0		%w/v	0
Cellobiose			0		%w/v	0
Galacturonic Acid	33.46	1124.44	3.08546	11.04	%w/v	15.7021
			Sum	100
1-22-21-Raw-Hyd-R1-200x-Rep1
						Dry Weight
Name	RT	Area	Amount	Peak Area Percent	Unit	17.55
2-Dog	7.17	1754.78	2	15.71	%w/v	% Dry Wt
Rhamnose	8.51	106.082	0.285336	0.95	%w/v	1.62585
Arabinose	9.91	637.467	0.793574	5.71	%w/v	4.52179
Galactose	13.23	364.599	0.49585	3.26	%w/v	2.31698
Glucose	14.25	5982.29	8.87582	53.54	%w/v	16.0629
Xylose	15.7	183.253	0.230723	1.64	%w/v	1.31466
Fructose	17.27	815.2	2.15548	7.3	%w/v	11.1121
Sucrose			0		%w/v	0
Cellobiose			0		%w/v	0
Galacturonic Acid	33.4	1329.42	2.66449	11.9	%w/v	15.1823
			Sum	100
1-22-21-Raw-Hyd-R1-200x-Rep2
						Dry Weight
Name	RT	Area	Amount	Peak Area Percent	Unit	17.55
2-Dog	7.17	1803.74	2	15.77	%w/v	% Dry Wt
Rhamnose	8.51	109.991	0.287817	0.96	%w/v	1.63998
Arabinose	9.91	651.037	0.788466	5.69	%w/v	4.49268
Galactose	13.22	374.723	0.495785	3.28	%w/v	2.31661
Glucose	14.24	6123.7	8.83898	53.53	%w/v	15.853
Xylose	15.69	201.086	0.246303	1.76	%w/v	1.40344
Fructose	17.27	836.3	2.15124	7.31	%w/v	11.0879
Sucrose			0		%w/v	0
Cellobiose			0		%w/v	0
Galacturonic Acid	33.4	1338.63	2.61012	11.7	%w/v	14.8725
			Sum	100
1-22-21-Raw-Hyd-R2-200x-Rep1
						Dry Weight
Name	RT	Area	Amount	Peak Area Percent	Unit	17.55
2-Dog	7.16	1817.62	2	16.47	%w/v	% Dry Wt
Rhamnose	8.51	105.346	0.273558	0.95	%w/v	1.55874
Arabinose	9.9	639.682	0.7688	5.8	%w/v	4.38063
Galactose	13.22	380.534	0.49963	3.45	%w/v	2.33852
Glucose	14.24	5848.38	8.37714	53.01	%w/v	13.2215
Xylose	15.69	203.831	0.24776	1.85	%w/v	1.41174
Fructose	17.27	751.959	1.91952	6.82	%w/v	9.76759
Sucrose			0		%w/v	0
Cellobiose			0		%w/v	0
Galacturonic Acid	33.39	1285.41	2.48721	11.65	%w/v	14.1721
			Sum	100
1-22-21-Raw-Hyd-R2-200x-Rep2
						Dry Weight
Name	RT	Area	Amount	Peak Area Percent	Unit	17.55
2-Dog	7.16	1747.92	2	16.46	%w/v	% Dry Wt
Rhamnose	8.5	96.9211	0.261717	0.91	%w/v	1.49126
Arabinose	9.9	615.219	0.768884	5.79	%w/v	4.38111
Galactose	13.21	348.963	0.476448	3.29	%w/v	2.20643
Glucose	14.24	5628.13	8.38312	53	%w/v	13.2555
Xylose	15.68	184.889	0.233697	1.74	%w/v	1.33161
Fructose	17.27	720.734	1.91318	6.79	%w/v	9.73144
Sucrose			0		%w/v	0
Cellobiose			0		%w/v	0
Galacturonic Acid	33.39	1276.91	2.5693	12.02	%w/v	14.6399
			Sum	100
1-22-21-Raw-Hyd-R3-200x-Rep1
						Dry Weight
Name	RT	Area	Amount	Peak Area Percent	Unit	17.55
2-Dog	7.15	1712.99	2	15.63	%w/v	% Dry Wt
Rhamnose	8.5	101.077	0.278504	0.92	%w/v	1.58692
Arabinose	9.9	621.15	0.792122	5.67	%w/v	4.51352
Galactose	13.2	360.941	0.502848	3.29	%w/v	2.35686
Glucose	14.22	5687.95	8.64495	51.9	%w/v	14.7474
Xylose	15.67	209.137	0.269735	1.91	%w/v	1.53695
Fructose	17.25	761.337	2.06216	6.95	%w/v	10.5803
Sucrose			0		%w/v	0
Cellobiose			0		%w/v	0
Galacturonic Acid	33.39	1309.01	2.68757	11.94	%w/v	15.3138
			Sum	98.21
1-22-21-Raw-Hyd-R3-200x-Rep2
						Dry Weight
Name	RT	Area	Amount	Peak Area Percent	Unit	17.55
2-Dog	7.16	1729.43	2	16.08	%w/v	% Dry Wt
Rhamnose	8.5	99.101	0.270464	0.92	%w/v	1.54111
Arabinose	9.9	624.04	0.788242	5.8	%w/v	4.49141
Galactose	13.21	357.676	0.493564	3.33	%w/v	2.30396
Glucose	14.23	5700.36	8.58145	53.01	%w/v	14.3856
Xylose	15.68	192.609	0.246055	1.79	%w/v	1.40202
Fructose	17.26	748.12	2.0071	6.96	%w/v	10.2666
Sucrose			0		%w/v	0
Cellobiose			0		%w/v	0
Galacturonic Acid	33.4	1302.25	2.64827	12.11	%w/v	15.0899
			Sum	100
2-3-21-Raw-Hyd-R1-200x-Rep1
						Dry Weight
Name	RT	Area	Amount	Peak Area Percent	Unit	22.3
2-Dog	7.47	1497.28	2	13.69	%w/v	% Dry Wt
Rhamnose	8.83	95.1915	0.278366	0.87	%w/v	1.24828
Arabinose	10.28	713.807	1.01076	6.53	%w/v	4.53253
Galactose	13.78	412.821	0.604851	3.77	%w/v	2.33862
Glucose	14.85	5789.19	8.67542	52.93	%w/v	13.7842
Xylose	16.21	223.4	0.286352	2.04	%w/v	1.28409
Fructose	17.68	968.386	2.34292	8.85	%w/v	9.70902
Sucrose			0		%w/v	0
Cellobiose			0		%w/v	0
Galacturonic Acid	33.47	1237.48	3.18437	11.31	%w/v	14.2797
			Sum	100
2-3-21-Raw-Hyd-R1-200x-Rep2
						Dry Weight
Name	RT	Area	Amount	Peak Area Percent	Unit	22.3
2-Dog	7.47	1505.36	2	13.78	%w/v	% Dry Wt
Rhamnose	8.83	97.4425	0.283419	0.89	%w/v	1.27094
Arabinose	10.29	719.502	1.01335	6.59	%w/v	4.54417
Galactose	13.78	405.8	0.591373	3.72	%w/v	2.27818
Glucose	14.85	5770.29	8.60069	52.83	%w/v	13.449
Xylose	16.21	221.125	0.281914	2.02	%w/v	1.26419
Fructose	17.68	967.054	2.32714	8.85	%w/v	9.63825
Sucrose			0		%w/v	0
Cellobiose			0		%w/v	0
Galacturonic Acid	33.48	1236.69	3.16527	11.32	%w/v	14.194
			Sum	100
2-3-21-Raw-Hyd-R2-200x-Rep1
						Dry Weight
Name	RT	Area	Amount	Peak Area Percent	Unit	22.3
2-Dog	7.47	1490.86	2	13.63	%w/v	% Dry Wt
Rhamnose	8.84	95.2099	0.279618	0.87	%w/v	1.25389
Arabinose	10.29	745.886	1.06072	6.82	%w/v	4.75661
Galactose	13.79	425.931	0.626745	3.89	%w/v	2.4368
Glucose	14.85	5725.47	8.61686	52.35	%w/v	13.5216
Xylose	16.21	235.849	0.30361	2.16	%w/v	1.36148
Fructose	17.68	932.965	2.26694	8.53	%w/v	9.36828
Sucrose			0		%w/v	0
Cellobiose			0		%w/v	0
Galacturonic Acid	33.48	1283.96	3.3182	11.74	%w/v	14.8798
			Sum	100
2-3-21-Raw-Hyd-R2-200x-Rep2
						Dry Weight
Name	RT	Area	Amount	Peak Area Percent	Unit	22.3
2-Dog	7.48	1491.35	2	13.67	%w/v	% Dry Wt
Rhamnose	8.84	97.7647	0.287026	0.9	%w/v	1.28711
Arabinose	10.29	746.784	1.06165	6.85	%w/v	4.76077
Galactose	13.79	415.506	0.611204	3.81	%w/v	2.36711
Glucose	14.86	5721.02	8.60734	52.45	%w/v	13.4789
Xylose	16.22	229.796	0.29572	2.11	%w/v	1.3261
Fructose	17.69	925.964	2.24919	8.49	%w/v	9.28868
Sucrose			0		%w/v	0
Cellobiose			0		%w/v	0
Galacturonic Acid	33.48	1279.93	3.30669	11.73	%w/v	14.8282
			Sum	100
2-3-21-Raw-Hyd-R3-200x-Rep1
						Dry Weight
Name	RT	Area	Amount	Peak Area Percent	Unit	22.3
2-Dog	7.48	1503.05	2	13.86	%w/v	% Dry Wt
Rhamnose	8.84	94.1212	0.274179	0.87	%w/v	1.2295
Arabinose	10.29	736.764	1.03926	6.79	%w/v	4.66034
Galactose	13.8	410.589	0.59927	3.79	%w/v	2.31359
Glucose	14.87	5699.88	8.5088	52.57	%w/v	13.037
Xylose	16.22	226.791	0.289582	2.09	%w/v	1.29857
Fructose	17.69	912.544	2.19934	8.42	%w/v	9.06516
Sucrose			0		%w/v	0
Cellobiose			0		%w/v	0
Galacturonic Acid	33.48	1259.41	3.22837	11.61	%w/v	14.477
			Sum	100
2-3-21-Raw-Hyd-R3-200x-Rep2
						Dry Weight
Name	RT	Area	Amount	Peak Area Percent	Unit	22.3
2-Dog	7.48	1505.47	2	13.91	%w/v	% Dry Wt
Rhamnose	8.84	96.0159	0.279248	0.89	%w/v	1.25223
Arabinose	10.29	735.107	1.03525	6.79	%w/v	4.64236
Galactose	13.8	412.304	0.600803	3.81	%w/v	2.32047
Glucose	14.86	5694.22	8.48663	52.61	%w/v	12.9376
Xylose	16.22	219.543	0.279876	2.03	%w/v	1.25505
Fructose	17.69	902.187	2.17087	8.34	%w/v	8.93749
Sucrose			0		%w/v	0
Cellobiose			0		%w/v	0
Galacturonic Acid	33.48	1258.1	3.21979	11.62	%w/v	14.4385
			Sum	100
2-19-21-Raw-Hyd-R1-200x-Rep1
						Dry Weight
Name	RT	Area	Amount	Peak Area Percent	Unit	22.25
2-Dog	7.48	1519.35	2	13.61	%w/v	% Dry Wt
Rhamnose	8.84	104.386	0.300818	0.93	%w/v	1.35199
Arabinose	10.29	909.58	1.26925	8.15	%w/v	5.70451
Galactose	13.8	439.923	0.635193	3.94	%w/v	2.48024
Glucose	14.86	5685.51	8.39625	50.93	%w/v	12.5604
Xylose	16.22	254.24	0.321147	2.28	%w/v	1.44336
Fructose	17.71	674.106	1.60724	6.04	%w/v	6.42439
Sucrose			0		%w/v	0
Cellobiose			0		%w/v	0
Galacturonic Acid	33.48	1577.31	3.99986	14.13	%w/v	17.9769
			Sum	100
2-19-21-Raw-Hyd-R1-200x-Rep2
						Dry Weight
Name	RT	Area	Amount	Peak Area Percent	Unit	22.25
2-Dog	7.48	1521.33	2	13.62	%w/v	% Dry Wt
Rhamnose	8.84	105.911	0.304816	0.95	%w/v	1.36996
Arabinose	10.29	907.346	1.26449	8.12	%w/v	5.6831
Galactose	13.8	436.283	0.629118	3.91	%w/v	2.45294
Glucose	14.87	5704.27	8.41299	51.08	%w/v	12.6357
Xylose	16.23	256.679	0.323806	2.3	%w/v	1.45531
Fructose	17.71	668.022	1.59066	5.98	%w/v	6.34989
Sucrose			0		%w/v	0
Cellobiose			0		%w/v	0
Galacturonic Acid	33.47	1567.91	3.97087	14.04	%w/v	17.8466
			Sum	100
2-19-21-Raw-Hyd-R2-200x-Rep1
						Dry Weight
Name	RT	Area	Amount	Peak Area Percent	Unit	22.25
2-Dog	7.48	1528.18	2	13.65	%w/v	% Dry Wt
Rhamnose	8.84	103.131	0.295483	0.92	%w/v	1.32801
Arabinose	10.29	919.14	1.27518	8.21	%w/v	5.73116
Galactose	13.8	434.145	0.623229	3.88	%w/v	2.42647
Glucose	14.87	5729.86	8.41285	51.17	%w/v	12.6351
Xylose	16.23	254.726	0.319901	2.27	%w/v	1.43776
Fructose	17.72	674.302	1.59841	6.02	%w/v	6.38474
Sucrose			0		%w/v	0
Cellobiose			0		%w/v	0
Galacturonic Acid	33.48	1554.18	3.91843	13.88	%w/v	17.6109
			Sum	100
2-19-21-Raw-Hyd-R2-200x-Rep2
						Dry Weight
Name	RT	Area	Amount	Peak Area Percent	Unit	22.25
2-Dog	7.48	1536.43	2	13.68	%w/v	% Dry Wt
Rhamnose	8.84	102.802	0.292962	0.92	%w/v	1.31668
Arabinose	10.29	925.31	1.27686	8.24	%w/v	5.73868
Galactose	13.8	444.289	0.634369	3.96	%w/v	2.47654
Glucose	14.87	5756.97	8.40732	51.26	%w/v	12.6102
Xylose	16.23	249.367	0.31149	2.22	%w/v	1.39996
Fructose	17.72	656.655	1.54823	5.85	%w/v	6.1592
Sucrose			0		%w/v	0
Cellobiose			0		%w/v	0
Galacturonic Acid	33.48	1558.48	3.90821	13.88	%w/v	17.565
			Sum	100
2-19-21-Raw-Hyd-R3-200x-Rep1
						Dry Weight
Name	RT	Area	Amount	Peak Area Percent	Unit	22.25
2-Dog	7.48	1551.75	2	13.02	%w/v	% Dry Wt
Rhamnose	8.84	111.317	0.314094	0.93	%w/v	1.41166
Arabinose	10.29	983.673	1.34399	8.25	%w/v	6.0404
Galactose	13.8	465.819	0.658543	3.91	%w/v	2.58519
Glucose	14.86	6115.43	8.84261	51.3	%w/v	14.5666
Xylose	16.22	263.447	0.32583	2.21	%w/v	1.4644
Fructose	17.71	709.83	1.65708	5.95	%w/v	6.64841
Sucrose			0		%w/v	0
Cellobiose			0		%w/v	0
Galacturonic Acid	33.48	1719.35	4.26905	14.42	%w/v	19.1868
			Sum	100
2-19-21-Raw-Hyd-R3-200x-Rep2
						Dry Weight
Name	RT	Area	Amount	Peak Area Percent	Unit	22.25
2-Dog	7.47	1553.54	2	13.09	%w/v	% Dry Wt
Rhamnose	8.83	111.913	0.315412	0.94	%w/v	1.41758
Arabinose	10.28	981.957	1.3401	8.27	%w/v	6.02291
Galactose	13.78	463.423	0.654399	3.9	%w/v	2.56656
Glucose	14.84	6075.03	8.77406	51.17	%w/v	14.2585
Xylose	16.21	283.703	0.350477	2.39	%w/v	1.57518
Fructose	17.7	705.249	1.64449	5.94	%w/v	6.59181
Sucrose			0		%w/v	0
Cellobiose			0		%w/v	0
Galacturonic Acid	33.48	1696.3	4.20696	14.29	%w/v	18.9077
			Sum	100
3-5-21-Raw-Hyd-R1-200x-Rep1
						Dry Weight
Name	RT	Area	Amount	Peak Area Percent	Unit	23.93
2-Dog	7.36	1668.3	2	12.78	%w/v	% Dry Wt
Rhamnose	8.73	125.157	0.325321	0.96	%w/v	1.35947
Arabinose	10.16	1107.48	1.43705	8.48	%w/v	6.00522
Galactose	13.58	647.601	0.878422	4.96	%w/v	3.25231
Glucose	14.63	6257.2	8.95477	47.93	%w/v	13.3226
Xylose	16.02	291.881	0.342998	2.24	%w/v	1.43334
Fructose	17.53	1000.45	2.18634	7.66	%w/v	8.19546
Sucrose			0		%w/v	0
Cellobiose			0		%w/v	0
Galacturonic Acid	33.46	1956.94	4.02198	14.99	%w/v	16.8073
			Sum	100
3-5-21-Raw-Hyd-R1-200x-Rep2
						Dry Weight
Name	RT	Area	Amount	Peak Area Percent	Unit	23.93
2-Dog	7.39	1676.41	2	12.79	%w/v	% Dry Wt
Rhamnose	8.74	125.751	0.325283	0.96	%w/v	1.35931
Arabinose	10.18	1111.26	1.43498	8.48	%w/v	5.99657
Galactose	13.61	655.91	0.885389	5	%w/v	3.28142
Glucose	14.66	6315.16	8.99401	48.17	%w/v	13.4866
Xylose	16.04	294.394	0.344278	2.25	%w/v	1.43869
Fructose	17.55	963.516	2.09545	7.35	%w/v	7.81563
Sucrose			0		%w/v	0
Cellobiose			0		%w/v	0
Galacturonic Acid	33.47	1968.61	4.02639	15.01	%w/v	16.8257
			Sum	100
3-5-21-Raw-Hyd-R2-200x-Rep1
						Dry Weight
Name	RT	Area	Amount	Peak Area Percent	Unit	23.93
2-Dog	7.38	1683.58	2	12.7	%w/v	% Dry Wt
Rhamnose	8.73	129.563	0.333716	0.98	%w/v	1.39455
Arabinose	10.17	1125.54	1.44722	8.49	%w/v	6.04773
Galactose	13.61	646.93	0.869546	4.88	%w/v	3.21522
Glucose	14.65	6404.36	9.08216	48.31	%w/v	13.855
Xylose	16.04	301.227	0.350767	2.27	%w/v	1.4658
Fructose	17.54	995.298	2.15534	7.51	%w/v	8.06592
Sucrose			0		%w/v	0
Cellobiose			0		%w/v	0
Galacturonic Acid	33.46	1969.38	4.01079	14.86	%w/v	16.7605
			Sum	100
3-5-21-Raw-Hyd-R2-200x-Rep2
						Dry Weight
Name	RT	Area	Amount	Peak Area Percent	Unit	23.93
2-Dog	7.37	1686.63	2	12.71	%w/v	% Dry Wt
Rhamnose	8.72	126.954	0.326403	0.96	%w/v	1.36399
Arabinose	10.16	1126.49	1.44583	8.49	%w/v	6.0419
Galactose	13.58	660.317	0.885935	4.98	%w/v	3.2837
Glucose	14.62	6406.82	9.06923	48.28	%w/v	13.801
Xylose	16.01	297.102	0.345338	2.24	%w/v	1.44312
Fructose	17.52	1008.44	2.17986	7.6	%w/v	8.16837
Sucrose			0		%w/v	0
Cellobiose			0		%w/v	0
Galacturonic Acid	33.46	1958.13	3.98067	14.76	%w/v	16.6347
			Sum	100
3-5-21-Raw-Hyd-R3-200x-Rep1
						Dry Weight
Name	RT	Area	Amount	Peak Area Percent	Unit	23.93
2-Dog	7.35	1689.25	2	13.4	%w/v	% Dry Wt
Rhamnose	8.71	114.718	0.294487	0.91	%w/v	1.23062
Arabinose	10.15	1046.13	1.3406	8.3	%w/v	5.60217
Galactose	13.56	609.242	0.816141	4.83	%w/v	2.99205
Glucose	14.61	6060.7	8.56597	48.09	%w/v	11.6979
Xylose	15.99	282.703	0.328092	2.24	%w/v	1.37105
Fructose	17.52	972.385	2.09866	7.72	%w/v	7.82905
Sucrose			0		%w/v	0
Cellobiose			0		%w/v	0
Galacturonic Acid	33.46	1827.48	3.70932	14.5	%w/v	15.5007
			Sum	100
3-5-21-Raw-Hyd-R3-200x-Rep2
						Dry Weight
Name	RT	Area	Amount	Peak Area Percent	Unit	23.93
2-Dog	7.35	1687.28	2	13.36	%w/v	% Dry Wt
Rhamnose	8.71	112.694	0.28963	0.89	%w/v	1.21032
Arabinose	10.15	1051.07	1.34851	8.32	%w/v	5.63523
Galactose	13.55	619.361	0.830668	4.91	%w/v	3.05275
Glucose	14.6	6091.44	8.61952	48.24	%w/v	11.9217
Xylose	15.99	280.279	0.32566	2.22	%w/v	1.36089
Fructose	17.51	964.401	2.08386	7.64	%w/v	7.76723
Sucrose			0		%w/v	0
Cellobiose			0		%w/v	0
Galacturonic Acid	33.46	1820.33	3.69912	14.42	%w/v	15.4581
			Sum	100
Citrus Fiber-Hyd-R1-200x-Rep1
						Dry Weight
Name	RT	Area	Amount	Peak Area Percent	Unit	91.3328
2-Dog	7.34	1809.81	2	12.1	%w/v	% Dry Wt
Rhamnose	8.76	150.316	0.329057	1	%w/v	0.360283
Arabinose	10.26	1714.01	2.01084	11.46	%w/v	2.20166
Galactose	13.72	986.612	1.19237	6.6	%w/v	1.1564
Glucose	14.75	6447.42	7.78312	43.1	%w/v	2.59435
Xylose	16.18	656.99	0.6552	4.39	%w/v	0.710019
Fructose	18.04	166.995	0.231584	1.12	%w/v	0.0602034
Sucrose			0		%w/v	0
Cellobiose			0		%w/v	0
Galacturonic Acid	33.56	3026.99	5.51473	20.24	%w/v	6.03805
			Sum	100
Citrus Fiber-Hyd-R1-200x-Rep2
						Dry Weight
Name	RT	Area	Amount	Peak Area Percent	Unit	91.3328
2-Dog	7.34	1820.43	2	12.13	%w/v	% Dry Wt
Rhamnose	8.76	156.43	0.340444	1.04	%w/v	0.372751
Arabinose	10.26	1718.9	2.00482	11.45	%w/v	2.19507
Galactose	13.73	985.219	1.18375	6.56	%w/v	1.14695
Glucose	14.76	6480.13	7.77698	43.18	%w/v	2.58763
Xylose	16.18	640.82	0.635347	4.27	%w/v	0.688282
Fructose	18.03	163.544	0.225477	1.09	%w/v	0.0535169
Sucrose			0		%w/v	0
Cellobiose			0		%w/v	0
Galacturonic Acid	33.56	3043.12	5.51177	20.28	%w/v	6.03482
			Sum	100
Citrus Fiber-Hyd-R2-200x-Rep1
						Dry Weight
Name	RT	Area	Amount	Peak Area Percent	Unit	91.3328
2-Dog	7.34	1795.33	2	12.01	%w/v	% Dry Wt
Rhamnose	8.76	157.727	0.348065	1.05	%w/v	0.381095
Arabinose	10.25	1727.1	2.04255	11.55	%w/v	2.23638
Galactose	13.72	982.854	1.19741	6.57	%w/v	1.16192
Glucose	14.75	6462.47	7.86421	43.22	%w/v	2.68313
Xylose	16.17	614.345	0.617613	4.11	%w/v	0.668866
Fructose	18.01	161.157	0.225291	1.08	%w/v	0.0533132
Sucrose			0		%w/v	0
Cellobiose			0		%w/v	0
Galacturonic Acid	33.57	3050.47	5.60233	20.4	%w/v	6.13397
			Sum	100
Citrus Fiber-Hyd-R2-200x-Rep2
						Dry Weight
Name	RT	Area	Amount	Peak Area Percent	Unit	91.3328
2-Dog	7.34	1786.38	2	11.93	%w/v	% Dry Wt
Rhamnose	8.76	151.262	0.335469	1.01	%w/v	0.367304
Arabinose	10.26	1721.23	2.04579	11.5	%w/v	2.23993
Galactose	13.73	984.026	1.20484	6.57	%w/v	1.17005
Glucose	14.76	6514.21	7.96685	43.52	%w/v	2.79552
Xylose	16.18	617.761	0.624157	4.13	%w/v	0.676031
Fructose	18.01	162.882	0.228843	1.09	%w/v	0.0572023
Sucrose			0		%w/v	0
Cellobiose			0		%w/v	0
Galacturonic Acid	33.58	3030.01	5.59262	20.24	%w/v	6.12334
			Sum	100
Citrus Fiber-Hyd-R3-200x-Rep1
						Dry Weight
Name	RT	Area	Amount	Peak Area Percent	Unit	91.3328
2-Dog	7.34	1787.9	2	11.97	%w/v	% Dry Wt
Rhamnose	8.76	171.867	0.380844	1.15	%w/v	0.416985
Arabinose	10.25	1699.46	2.01821	11.38	%w/v	2.20973
Galactose	13.72	983.688	1.20341	6.59	%w/v	1.16848
Glucose	14.76	6493.25	7.9345	43.47	%w/v	2.76009
Xylose	16.17	613.307	0.619131	4.11	%w/v	0.670528
Fructose	17.99	161.72	0.227018	1.08	%w/v	0.0552041
Sucrose			0		%w/v	0
Cellobiose			0		%w/v	0
Galacturonic Acid	33.55	3027.05	5.58243	20.26	%w/v	6.11218
			Sum	100
Citrus Fiber-Hyd-R3-200x-Rep2
						Dry Weight
Name	RT	Area	Amount	Peak Area Percent	Unit	91.3328
2-Dog	7.35	1786.48	2	11.94	%w/v	% Dry Wt
Rhamnose	8.76	164.78	0.365429	1.1	%w/v	0.400107
Arabinose	10.25	1717.17	2.04086	11.48	%w/v	2.23453
Galactose	13.72	980.936	1.201	6.56	%w/v	1.16584
Glucose	14.76	6504.3	7.95432	43.47	%w/v	2.78179
Xylose	16.18	618.471	0.624841	4.13	%w/v	0.676779
Fructose	17.98	163.646	0.229904	1.09	%w/v	0.058364
Sucrose			0		%w/v	0
Cellobiose			0		%w/v	0
Galacturonic Acid	33.56	3026.27	5.58542	20.23	%w/v	6.11546
			Sum	100
Orange Fiber-121-22-Hyd-R1-200x-Rep1
						Dry Weight
Name	RT	Area	Amount	Peak Area Percent	Unit	91.0535
2-Dog	7.41	1594.66	2	13.61	%w/v	% Dry Wt
Rhamnose	8.79	92.9747	0.256076	0.79	%w/v	0.281237
Arabinose	10.22	965.184	1.2787	8.24	%w/v	1.40434
Galactose	13.68	509.941	0.723059	4.35	%w/v	0.667643
Glucose	14.77	5950.26	8.89203	50.77	%w/v	3.20628
Xylose	16.13	264.816	0.3271	2.26	%w/v	0.359239
Fructose	17.62	818.051	1.96715	6.98	%w/v	1.89025
Sucrose			0		%w/v	0
Cellobiose			0		%w/v	0
Galacturonic Acid	33.43	1523.25	3.80915	13	%w/v	4.18342
			Sum	100
Orange Fiber-121-22-Hyd-R1-200x-Rep2
						Dry Weight
Name	RT	Area	Amount	Peak Area Percent	Unit	91.0535
2-Dog	7.41	1595.88	2	13.62	%w/v	% Dry Wt
Rhamnose	8.79	94.8779	0.261118	0.81	%w/v	0.286774
Arabinose	10.22	968.232	1.28176	8.26	%w/v	1.4077
Galactose	13.68	505.997	0.716918	4.32	%w/v	0.660898
Glucose	14.76	5937.17	8.86569	50.68	%w/v	3.17735
Xylose	16.13	261.645	0.322936	2.23	%w/v	0.354666
Fructose	17.62	825.014	1.98238	7.04	%w/v	1.90697
Sucrose			0		%w/v	0
Cellobiose			0		%w/v	0
Galacturonic Acid	33.43	1526.46	3.81426	13.03	%w/v	4.18903
			Sum	100
Orange Fiber-121-22-Hyd-R2-200x-Rep1
						Dry Weight
Name	RT	Area	Amount	Peak Area Percent	Unit	91.0535
2-Dog	7.42	1606.57	2	13.49	%w/v	% Dry Wt
Rhamnose	8.81	96.6883	0.264331	0.81	%w/v	0.290303
Arabinose	10.23	981.512	1.2907	8.24	%w/v	1.41751
Galactose	13.69	514.356	0.723914	4.32	%w/v	0.668582
Glucose	14.77	6081.6	9.02095	51.06	%w/v	3.34787
Xylose	16.13	260.406	0.319268	2.19	%w/v	0.350638
Fructose	17.62	837.677	1.99942	7.03	%w/v	1.92569
Sucrose			0		%w/v	0
Cellobiose			0		%w/v	0
Galacturonic Acid	33.43	1532.37	3.80355	12.86	%w/v	4.17727
			Sum	100
Orange Fiber-121-22-Hyd-R2-200x-Rep2
						Dry Weight
Name	RT	Area	Amount	Peak Area Percent	Unit	91.0535
2-Dog	7.41	1622.08	2	13.55	%w/v	% Dry Wt
Rhamnose	8.8	97.6192	0.264325	0.82	%w/v	0.290296
Arabinose	10.22	985.963	1.28415	8.24	%w/v	1.41033
Galactose	13.68	519.247	0.723812	4.34	%w/v	0.668469
Glucose	14.76	6101.41	8.96382	50.97	%w/v	3.28512
Xylose	16.12	259.596	0.315233	2.17	%w/v	0.346206
Fructose	17.62	830.055	1.96228	6.93	%w/v	1.8849
Sucrose			0		%w/v	0
Cellobiose			0		%w/v	0
Galacturonic Acid	33.43	1554.78	3.82227	12.99	%w/v	4.19783
			Sum	100
Orange Fiber-121-22-Hyd-R3-200x-Rep1
						Dry Weight
Name	RT	Area	Amount	Peak Area Percent	Unit	91.0535
2-Dog	7.42	1667.13	2	13.66	%w/v	% Dry Wt
Rhamnose	8.8	102.503	0.270047	0.84	%w/v	0.296581
Arabinose	10.23	1005.92	1.27474	8.24	%w/v	1.39999
Galactose	13.69	532.113	0.721701	4.36	%w/v	0.666151
Glucose	14.76	6207	8.87251	50.84	%w/v	3.18483
Xylose	16.13	260.508	0.307791	2.13	%w/v	0.338033
Fructose	17.62	850.46	1.95619	6.97	%w/v	1.87821
Sucrose			0		%w/v	0
Cellobiose			0		%w/v	0
Galacturonic Acid	33.43	1582.17	3.78449	12.96	%w/v	4.15633
			Sum	100
Orange Fiber-121-22-Hyd-R3-200x-Rep2
						Dry Weight
Name	RT	Area	Amount	Peak Area Percent	Unit	91.0535
2-Dog	7.41	1668.16	2	13.62	%w/v	% Dry Wt
Rhamnose	8.8	103.624	0.272832	0.85	%w/v	0.299639
Arabinose	10.22	1004.33	1.27194	8.2	%w/v	1.39692
Galactose	13.68	533.723	0.723437	4.36	%w/v	0.668058
Glucose	14.75	6238.2	8.91159	50.92	%w/v	3.22776
Xylose	16.12	265.607	0.313621	2.17	%w/v	0.344436
Fructose	17.61	855.865	1.9674	6.99	%w/v	1.89052
Sucrose			0		%w/v	0
Cellobiose			0		%w/v	0
Galacturonic Acid	33.43	1582.23	3.78229	12.91	%w/v	4.15392
			Sum	100
Lemon Fiber-178-21p5-Hyd-R1-200x-Rep1
						Dry Weight
Name	RT	Area	Amount	Peak Area Percent	Unit	93.3538
2-Dog	7.43	1629.84	2	14.13	%w/v	% Dry Wt
Rhamnose	8.81	71.4558	0.19256	0.62	%w/v	0.206269
Arabinose	10.23	884.261	1.1462	7.67	%w/v	1.22781
Galactose	13.7	559.811	0.776637	4.85	%w/v	0.708584
Glucose	14.79	5915.08	8.64866	51.28	%w/v	2.86658
Xylose	16.15	262.754	0.317547	2.28	%w/v	0.340154
Fructose	17.66	512.552	1.20592	4.44	%w/v	1.02825
Sucrose			0		%w/v	0
Cellobiose			0		%w/v	0
Galacturonic Acid	33.42	1699	4.15692	14.73	%w/v	4.45287
			Sum	100
Lemon Fiber-178-21p5-Hyd-R1-200x-Rep2
						Dry Weight
Name	RT	Area	Amount	Peak Area Percent	Unit	93.3538
2-Dog	7.42	1632.99	2	14.15	%w/v	% Dry Wt
Rhamnose	8.8	70.8188	0.190476	0.61	%w/v	0.204037
Arabinose	10.23	880.922	1.13968	7.63	%w/v	1.22082
Galactose	13.69	562.794	0.779275	4.88	%w/v	0.711409
Glucose	14.77	5908.06	8.62178	51.18	%w/v	2.83778
Xylose	16.13	263.901	0.318319	2.29	%w/v	0.340981
Fructose	17.65	518.209	1.21688	4.49	%w/v	1.03999
Sucrose			0		%w/v	0
Cellobiose			0		%w/v	0
Galacturonic Acid	33.42	1705.94	4.16587	14.78	%w/v	4.46245
			Sum	100
Lemon Fiber-178-21p5-Hyd-R2-200x-Rep1
						Dry Weight
Name	RT	Area	Amount	Peak Area Percent	Unit	93.3538
2-Dog	7.42	1632.66	2	13.92	%w/v	% Dry Wt
Rhamnose	8.81	70.891	0.190707	0.6	%w/v	0.204284
Arabinose	10.23	905.34	1.1715	7.72	%w/v	1.2549
Galactose	13.7	582.338	0.806494	4.97	%w/v	0.740566
Glucose	14.78	6004.16	8.76374	51.2	%w/v	2.98985
Xylose	16.15	263.075	0.317385	2.24	%w/v	0.339981
Fructose	17.66	506.763	1.19024	4.32	%w/v	1.01145
Sucrose			0		%w/v	0
Cellobiose			0		%w/v	0
Galacturonic Acid	33.43	1762.68	4.30528	15.03	%w/v	4.61179
			Sum	100
Lemon Fiber-178-21p5-Hyd-R2-200x-Rep2
						Dry Weight
Name	RT	Area	Amount	Peak Area Percent	Unit	93.3538
2-Dog	7.42	1633.99	2	13.91	%w/v	% Dry Wt
Rhamnose	8.8	71.1873	0.191349	0.61	%w/v	0.204972
Arabinose	10.23	903.653	1.16837	7.69	%w/v	1.25155
Galactose	13.69	586.559	0.811681	4.99	%w/v	0.746122
Glucose	14.77	6027.07	8.79005	51.3	%w/v	3.01803
Xylose	16.13	265.221	0.319715	2.26	%w/v	0.342477
Fructose	17.64	500.464	1.17449	4.26	%w/v	0.994581
Sucrose			0		%w/v	0
Cellobiose			0		%w/v	0
Galacturonic Acid	33.43	1759.65	4.29439	14.98	%w/v	4.60012
			Sum	100
Lemon Fiber-178-21p5-Hyd-R3-200x-Rep1
						Dry Weight
Name	RT	Area	Amount	Peak Area Percent	Unit	93.3538
2-Dog	7.43	1666.5	2	14.24	%w/v	% Dry Wt
Rhamnose	8.81	70.852	0.186733	0.61	%w/v	0.200027
Arabinose	10.23	904.806	1.14704	7.73	%w/v	1.2287
Galactose	13.7	588.127	0.797976	5.02	%w/v	0.731442
Glucose	14.78	5969.76	8.53662	51	%w/v	2.74656
Xylose	16.14	276.834	0.327204	2.36	%w/v	0.350499
Fructose	17.65	465.256	1.07057	3.97	%w/v	0.883257
Sucrose			0		%w/v	0
Cellobiose			0		%w/v	0
Galacturonic Acid	33.42	1763.33	4.21942	15.06	%w/v	4.51982
			Sum	100
Lemon Fiber-178-21p5-Hyd-R3-200x-Rep2
						Dry Weight
Name	RT	Area	Amount	Peak Area Percent	Unit	93.3538
2-Dog	7.42	1669.94	2	14.27	%w/v	% Dry Wt
Rhamnose	8.81	70.636	0.18578	0.6	%w/v	0.199006
Arabinose	10.23	900.437	1.13915	7.69	%w/v	1.22025
Galactose	13.7	592.468	0.802209	5.06	%w/v	0.735976
Glucose	14.78	5968.72	8.51756	51	%w/v	2.72614
Xylose	16.15	273.563	0.322673	2.34	%w/v	0.345645
Fructose	17.66	468.516	1.07584	4	%w/v	0.888912
Sucrose			0		%w/v	0
Cellobiose			0		%w/v	0
Galacturonic Acid	33.42	1759.6	4.20183	15.03	%w/v	4.50097
			Sum	100
3-1-Citrus Fiber-Orange Fiber-Hyd-R1-200x-Rep1
						Dry Weight
Name	RT	Area	Amount	Peak Area Percent	Unit	98.9484
2-Dog	7.35	1837.6	2	11.84	%w/v	% Dry Wt
Rhamnose	8.76	173.306	0.373645	1.12	%w/v	0.377616
Arabinose	10.26	1710.6	1.97649	11.02	%w/v	1.99749
Galactose	13.73	970.361	1.155	6.25	%w/v	1.02963
Glucose	14.76	6754.1	8.03003	43.5	%w/v	2.6442
Xylose	16.18	589.481	0.578984	3.8	%w/v	0.578347
Fructose	17.92	460.846	0.629426	2.97	%w/v	0.45764
Sucrose			0		%w/v	0
Cellobiose			0		%w/v	0
Galacturonic Acid	33.56	3029.62	5.43606	19.51	%w/v	5.49383
			Sum	100
3-1-Citrus Fiber-Orange Fiber-Hyd-R1-200x-Rep2
						Dry Weight
Name	RT	Area	Amount	Peak Area Percent	Unit	98.9484
2-Dog	7.35	1837.11	2	11.76	%w/v	% Dry Wt
Rhamnose	8.76	164.197	0.354101	1.05	%w/v	0.357864
Arabinose	10.26	1707.52	1.97346	10.93	%w/v	1.99444
Galactose	13.73	969.933	1.1548	6.21	%w/v	1.02942
Glucose	14.77	6824.95	8.11642	43.69	%w/v	2.73152
Xylose	16.18	612.39	0.601645	3.92	%w/v	0.601249
Fructose	17.92	441.441	0.603083	2.83	%w/v	0.431017
Sucrose			0		%w/v	0
Cellobiose			0		%w/v	0
Galacturonic Acid	33.59	3063.96	5.49913	19.61	%w/v	5.55757
			Sum	100
3-1-Citrus Fiber-Orange Fiber-Hyd-R2-200x-Rep1
						Dry Weight
Name	RT	Area	Amount	Peak Area Percent	Unit	98.9484
2-Dog	7.35	1830.62	2	11.68	%w/v	% Dry Wt
Rhamnose	8.76	183.917	0.398033	1.17	%w/v	0.402263
Arabinose	10.26	1717.35	1.99186	10.96	%w/v	2.01303
Galactose	13.73	962.99	1.15059	6.15	%w/v	1.02518
Glucose	14.77	6890.81	8.22379	43.97	%w/v	2.84002
Xylose	16.18	583.43	0.575226	3.72	%w/v	0.574549
Fructose	17.91	441.007	0.604626	2.81	%w/v	0.432576
Sucrose			0		%w/v	0
Cellobiose			0		%w/v	0
Galacturonic Acid	33.59	3060.76	5.51286	19.53	%w/v	5.57144
			Sum	100
3-1-Citrus Fiber-Orange Fiber-Hyd-R2-200x-Rep2
						Dry Weight
Name	RT	Area	Amount	Peak Area Percent	Unit	98.9484
2-Dog	7.35	1838.65	2	11.74	%w/v	% Dry Wt
Rhamnose	8.76	165.48	0.356569	1.06	%w/v	0.360358
Arabinose	10.25	1717.82	1.9837	10.97	%w/v	2.00478
Galactose	13.72	968.259	1.15184	6.18	%w/v	1.02644
Glucose	14.76	6875.58	8.1698	43.89	%w/v	2.78547
Xylose	16.17	593.662	0.582759	3.79	%w/v	0.582162
Fructose	17.9	447.262	0.610524	2.86	%w/v	0.438537
Sucrose			0		%w/v	0
Cellobiose			0		%w/v	0
Galacturonic Acid	33.6	3057.02	5.48208	19.52	%w/v	5.54034
			Sum	100
3-1-Citrus Fiber-Orange Fiber-Hyd-R3-200x-Rep1
						Dry Weight
Name	RT	Area	Amount	Peak Area Percent	Unit	98.9484
2-Dog	7.34	1849.33	2	11.56	%w/v	% Dry Wt
Rhamnose	8.75	178.158	0.38167	1.11	%w/v	0.385726
Arabinose	10.24	1744.88	2.00332	10.91	%w/v	2.02461
Galactose	13.7	999.152	1.18172	6.25	%w/v	1.05664
Glucose	14.74	7023.43	8.29727	43.91	%w/v	2.91429
Xylose	16.15	601.206	0.586755	3.76	%w/v	0.5862
Fructose	17.88	474.599	0.644098	2.97	%w/v	0.472468
Sucrose			0		%w/v	0
Cellobiose			0		%w/v	0
Galacturonic Acid	33.6	3124.56	5.57083	19.53	%w/v	5.63004
			Sum	100
3-1-Citrus Fiber-Orange Fiber-Hyd-R3-200x-Rep2
						Dry Weight
Name	RT	Area	Amount	Peak Area Percent	Unit	98.9484
2-Dog	7.34	1861.38	2	11.59	%w/v	% Dry Wt
Rhamnose	8.75	176.263	0.375166	1.1	%w/v	0.379153
Arabinose	10.24	1762.94	2.01094	10.98	%w/v	2.03232
Galactose	13.71	985.052	1.15751	6.14	%w/v	1.03216
Glucose	14.74	7057.1	8.28307	43.96	%w/v	2.89994
Xylose	16.16	597.764	0.579619	3.72	%w/v	0.578989
Fructose	17.88	474.625	0.639964	2.96	%w/v	0.46829
Sucrose			0		%w/v	0
Cellobiose			0		%w/v	0
Galacturonic Acid	33.6	3140.04	5.5622	19.56	%w/v	5.62131
			Sum	100
130C-1min-Hyd-R1-200x-Rep1
						Dry Weight
Name	RT	Area	Amount	Peak Area Percent	Unit	9.50834
2-Dog	7.48	1877.89	2	17.97	%w/v	% Dry Wt
Rhamnose	8.85	72.6932	0.175053	0.7	%w/v	1.84105
Arabinose	10.31	517.626	0.678147	4.95	%w/v	7.13213
Galactose	13.82	366.621	0.464016	3.51	%w/v	3.80674
Glucose	14.9	5980.71	7.78578	57.22	%w/v	18.1784
Xylose	16.23	183.568	0.214597	1.76	%w/v	2.25694
Fructose	17.79	243.497	0.531434	2.33	%w/v	2.99409
Sucrose			0		%w/v	0
Cellobiose			0		%w/v	0
Galacturonic Acid	33.49	1208.89	2.81016	11.57	%w/v	29.5547
			Sum	100
130C-1min-Hyd-R1-200x-Rep2
						Dry Weight
Name	RT	Area	Amount	Peak Area Percent	Unit	9.50834
2-Dog	7.48	1874.77	2	17.91	%w/v	% Dry Wt
Rhamnose	8.84	72.7721	0.175534	0.7	%w/v	1.84611
Arabinose	10.31	514.788	0.675551	4.92	%w/v	7.10483
Galactose	13.81	369.029	0.467841	3.53	%w/v	3.84697
Glucose	14.89	5989.24	7.80984	57.22	%w/v	18.4316
Xylose	16.23	191.928	0.224743	1.83	%w/v	2.36364
Fructose	17.79	250.927	0.548561	2.4	%w/v	3.17422
Sucrose			0		%w/v	0
Cellobiose			0		%w/v	0
Galacturonic Acid	33.49	1203.23	2.80167	11.5	%w/v	29.4654
			Sum	100
130C-1min-Hyd-R2-200x-Rep1
						Dry Weight
Name	RT	Area	Amount	Peak Area Percent	Unit	9.50834
2-Dog	7.48	1878.03	2	18.2	%w/v	% Dry Wt
Rhamnose	8.85	70.3783	0.169465	0.68	%w/v	1.78228
Arabinose	10.31	504.988	0.661539	4.89	%w/v	6.95746
Galactose	13.81	356.013	0.450555	3.45	%w/v	3.66517
Glucose	14.89	5816.93	7.57199	56.36	%w/v	15.93
Xylose	16.23	176.973	0.206872	1.71	%w/v	2.17569
Fructose	17.79	232.254	0.506856	2.25	%w/v	2.7356
Sucrose			0		%w/v	0
Cellobiose			0		%w/v	0
Galacturonic Acid	33.48	1169.28	2.71789	11.33	%w/v	28.5843
			Sum	98.87
130C-1min-Hyd-R2-200x-Rep2
						Dry Weight
Name	RT	Area	Amount	Peak Area Percent	Unit	9.50834
2-Dog	7.47	1884.21	2	18.42	%w/v	% Dry Wt
Rhamnose	8.84	71.3799	0.171314	0.7	%w/v	1.80172
Arabinose	10.31	504.156	0.658286	4.93	%w/v	6.92325
Galactose	13.81	357.951	0.451524	3.5	%w/v	3.67536
Glucose	14.89	5822.9	7.55492	56.93	%w/v	15.7505
Xylose	16.23	184.766	0.215274	1.81	%w/v	2.26406
Fructose	17.79	231.722	0.50404	2.27	%w/v	2.70599
Sucrose			0		%w/v	0
Cellobiose			0		%w/v	0
Galacturonic Acid	33.48	1171.39	2.71386	11.45	%w/v	28.5419
			Sum	100
130C-1min-Hyd-R3-200x-Rep1
						Dry Weight
Name	RT	Area	Amount	Peak Area Percent	Unit	9.50834
2-Dog	7.48	1888.4	2	18.12	%w/v	% Dry Wt
Rhamnose	8.85	75.7193	0.181326	0.73	%w/v	1.90702
Arabinose	10.31	515.517	0.671627	4.95	%w/v	7.06356
Galactose	13.81	371.548	0.467637	3.57	%w/v	3.84482
Glucose	14.89	5931.91	7.6793	56.93	%w/v	17.0586
Xylose	16.23	193.032	0.224406	1.85	%w/v	2.3601
Fructose	17.79	243.408	0.528284	2.34	%w/v	2.96096
Sucrose			0		%w/v	0
Cellobiose			0		%w/v	0
Galacturonic Acid	33.48	1200.4	2.77491	11.52	%w/v	29.184
			Sum	100
130C-1min-Hyd-R3-200x-Rep2
						Dry Weight
Name	RT	Area	Amount	Peak Area Percent	Unit	9.50834
2-Dog	7.48	1884.15	2	18.13	%w/v	% Dry Wt
Rhamnose	8.84	71.2933	0.171111	0.69	%w/v	1.79959
Arabinose	10.31	512.787	0.669575	4.93	%w/v	7.04198
Galactose	13.81	369.122	0.465629	3.55	%w/v	3.8237
Glucose	14.89	5922.1	7.68386	56.98	%w/v	17.1066
Xylose	16.23	198.268	0.231011	1.91	%w/v	2.42956
Fructose	17.79	243.733	0.530182	2.35	%w/v	2.98093
Sucrose			0		%w/v	0
Cellobiose			0		%w/v	0
Galacturonic Acid	33.48	1191.26	2.76	11.46	%w/v	29.0271
			Sum	100
130C-2min-Hyd-R1-200x-Rep1
						Dry Weight
Name	RT	Area	Amount	Peak Area Percent	Unit	8.37755
2-Dog	7.21	1421.05	2	20.54	%w/v	% Dry Wt
Rhamnose	8.6	43.0592	0.156812	0.62	%w/v	1.87181
Arabinose	10.02	320.788	0.49211	4.64	%w/v	5.87415
Galactose	13.37	229.326	0.394011	3.31	%w/v	3.45662
Glucose	14.43	3806.74	7.05912	55.02	%w/v	14.5924
Xylose	15.83	117.601	0.183336	1.7	%w/v	2.18842
Fructose	17.51	139.042	0.409098	2.01	%w/v	2.0257
Sucrose			0		%w/v	0
Cellobiose			0		%w/v	0
Galacturonic Acid	33.53	841.432	2.38954	12.16	%w/v	28.5231
			Sum	100
130C-2min-Hyd-R1-200x-Rep2
						Dry Weight
Name	RT	Area	Amount	Peak Area Percent	Unit	8.37755
2-Dog	7.21	1439.95	2	20.7	%w/v	% Dry Wt
Rhamnose	8.6	43.0888	0.15486	0.62	%w/v	1.84851
Arabinose	10.02	330.445	0.500269	4.75	%w/v	5.97154
Galactose	13.37	227.783	0.386221	3.28	%w/v	3.36363
Glucose	14.43	3799.18	6.9526	54.63	%w/v	13.3209
Xylose	15.84	115.871	0.178267	1.67	%w/v	2.12791
Fructose	17.51	152.495	0.44279	2.19	%w/v	2.42787
Sucrose			0		%w/v	0
Cellobiose			0		%w/v	0
Galacturonic Acid	33.53	846.141	2.37136	12.17	%w/v	28.3061
			Sum	100
130C-2min-Hyd-R2-200x-Rep1
						Dry Weight
Name	RT	Area	Amount	Peak Area Percent	Unit	8.37755
2-Dog	7.21	1477.21	2	21	%w/v	% Dry Wt
Rhamnose	8.6	42.1066	0.147513	0.6	%w/v	1.76081
Arabinose	10.02	328.751	0.485153	4.67	%w/v	5.79111
Galactose	13.37	224.54	0.371121	3.19	%w/v	3.18339
Glucose	14.43	3857.34	6.88101	54.85	%w/v	12.4664
Xylose	15.84	116.937	0.17537	1.66	%w/v	2.09333
Fructose	17.52	145.97	0.413157	2.08	%w/v	2.07416
Sucrose			0		%w/v	0
Cellobiose			0		%w/v	0
Galacturonic Acid	33.52	839.995	2.29476	11.94	%w/v	27.3918
			Sum	100
130C-2min-Hyd-R2-200x-Rep2
						Dry Weight
Name	RT	Area	Amount	Peak Area Percent	Unit	8.37755
2-Dog	7.21	1452.82	2	20.59	%w/v	% Dry Wt
Rhamnose	8.6	44.8805	0.159871	0.64	%w/v	1.90833
Arabinose	10.02	330.392	0.495759	4.68	%w/v	5.91771
Galactose	13.38	229.898	0.386355	3.26	%w/v	3.36523
Glucose	14.44	3884.13	7.04513	55.06	%w/v	14.4254
Xylose	15.84	124.039	0.189144	1.76	%w/v	2.25775
Fructose	17.52	150.23	0.432353	2.13	%w/v	2.30329
Sucrose			0		%w/v	0
Cellobiose			0		%w/v	0
Galacturonic Acid	33.53	838.245	2.32843	11.88	%w/v	27.7936
			Sum	100
130C-2min-Hyd-R3-200x-Rep1
						Dry Weight
Name	RT	Area	Amount	Peak Area Percent	Unit	8.37755
2-Dog	7.22	1497.39	2	20.72	%w/v	% Dry Wt
Rhamnose	8.6	47.8078	0.165229	0.66	%w/v	1.97228
Arabinose	10.02	344.541	0.501601	4.77	%w/v	5.98744
Galactose	13.38	236.536	0.385679	3.27	%w/v	3.35716
Glucose	14.44	3962.54	6.9734	54.83	%w/v	13.5692
Xylose	15.85	123.787	0.183141	1.71	%w/v	2.18609
Fructose	17.52	153.538	0.428719	2.12	%w/v	2.25991
Sucrose			0		%w/v	0
Cellobiose			0		%w/v	0
Galacturonic Acid	33.52	860.642	2.31948	11.91	%w/v	27.6869
			Sum	100
130C-2min-Hyd-R3-200x-Rep2
						Dry Weight
Name	RT	Area	Amount	Peak Area Percent	Unit	8.37755
2-Dog	7.21	1500.99	2	20.89	%w/v	% Dry Wt
Rhamnose	8.6	46.9905	0.162015	0.65	%w/v	1.93392
Arabinose	10.02	343.711	0.499194	4.78	%w/v	5.95871
Galactose	13.38	233.89	0.38045	3.26	%w/v	3.29474
Glucose	14.44	3952.84	6.93966	55.01	%w/v	13.1665
Xylose	15.84	124.042	0.183079	1.73	%w/v	2.18535
Fructose	17.52	148.114	0.412582	2.06	%w/v	2.06729
Sucrose			0		%w/v	0
Cellobiose			0		%w/v	0
Galacturonic Acid	33.52	834.5	2.24364	11.61	%w/v	26.7815
			Sum	100
130C-4min-Hyd-R1-200x-Rep1
						Dry Weight
Name	RT	Area	Amount	Peak Area Percent	Unit	8.97384
2-Dog	7.47	1653.91	2	18.29	%w/v	% Dry Wt
Rhamnose	8.85	57.7812	0.159749	0.64	%w/v	1.78016
Arabinose	10.28	516.768	0.664827	5.72	%w/v	7.4085
Galactose	13.78	354.221	0.491051	3.92	%w/v	4.16033
Glucose	14.87	5140.28	7.63882	56.86	%w/v	23.2601
Xylose	16.21	176.967	0.219041	1.96	%w/v	2.44088
Fructose	17.76	244.851	0.582456	2.71	%w/v	3.67798
Sucrose			0		%w/v	0
Cellobiose			0		%w/v	0
Galacturonic Acid	33.45	895.83	2.30917	9.91	%w/v	25.7323
			Sum	100
130C-4min-Hyd-R1-200x-Rep2
						Dry Weight
Name	RT	Area	Amount	Peak Area Percent	Unit	8.97384
2-Dog	7.47	1657.85	2	18.27	%w/v	% Dry Wt
Rhamnose	8.86	57.2813	0.157991	0.63	%w/v	1.76057
Arabinose	10.28	518.688	0.665712	5.72	%w/v	7.41836
Galactose	13.78	358.421	0.495692	3.95	%w/v	4.21205
Glucose	14.87	5144.09	7.62632	56.69	%w/v	23.1209
Xylose	16.21	181.918	0.224634	2	%w/v	2.50321
Fructose	17.76	253.49	0.601574	2.79	%w/v	3.89103
Sucrose			0		%w/v	0
Cellobiose			0		%w/v	0
Galacturonic Acid	33.44	902.95	2.322	9.95	%w/v	25.8752
			Sum	100
130C-4min-Hyd-R2-200x-Rep1
						Dry Weight
Name	RT	Area	Amount	Peak Area Percent	Unit	8.97384
2-Dog	7.47	1691.6	2	17.47	%w/v	% Dry Wt
Rhamnose	8.86	63.5174	0.171696	0.66	%w/v	1.91329
Arabinose	10.28	565.224	0.710966	5.84	%w/v	7.92265
Galactose	13.78	388.986	0.527231	4.02	%w/v	4.5635
Glucose	14.86	5522.36	8.02378	57.03	%w/v	27.55
Xylose	16.21	192.963	0.233519	1.99	%w/v	2.60222
Fructose	17.75	261.632	0.608508	2.7	%w/v	3.96829
Sucrose			0		%w/v	0
Cellobiose			0		%w/v	0
Galacturonic Acid	33.45	996.195	2.51067	10.29	%w/v	27.9777
			Sum	100
130C-4min-Hyd-R2-200x-Rep2
						Dry Weight
Name	RT	Area	Amount	Peak Area Percent	Unit	8.97384
2-Dog	7.47	1695.35	2	17.47	%w/v	% Dry Wt
Rhamnose	8.86	62.8188	0.169431	0.65	%w/v	1.88805
Arabinose	10.28	566.343	0.710795	5.84	%w/v	7.92074
Galactose	13.78	391.56	0.529543	4.04	%w/v	4.58927
Glucose	14.87	5540.98	8.033	57.11	%w/v	27.6527
Xylose	16.21	199.393	0.240765	2.06	%w/v	2.68296
Fructose	17.75	256.378	0.594968	2.64	%w/v	3.81741
Sucrose			0		%w/v	0
Cellobiose			0		%w/v	0
Galacturonic Acid	33.45	989.127	2.48734	10.2	%w/v	27.7177
			Sum	100
130C-4min-Hyd-R3-200x-Rep1
						Dry Weight
Name	RT	Area	Amount	Peak Area Percent	Unit	8.97384
2-Dog	7.47	1682.88	2	18.03	%w/v	% Dry Wt
Rhamnose	8.84	58.3559	0.15856	0.63	%w/v	1.76691
Arabinose	10.28	531.907	0.672524	5.7	%w/v	7.49427
Galactose	13.78	368.867	0.502552	3.95	%w/v	4.28849
Glucose	14.87	5299.9	7.74045	56.78	%w/v	24.3927
Xylose	16.21	187.952	0.228632	2.01	%w/v	2.54776
Fructose	17.75	272.973	0.638174	2.92	%w/v	4.29888
Sucrose			0		%w/v	0
Cellobiose			0		%w/v	0
Galacturonic Acid	33.45	931.298	2.35927	9.98	%w/v	26.2906
			Sum	100
130C-4min-Hyd-R3-200x-Rep2
						Dry Weight
Name	RT	Area	Amount	Peak Area Percent	Unit	8.97384
2-Dog	7.47	1688.68	2	18.11	%w/v	% Dry Wt
Rhamnose	8.85	59.2155	0.160343	0.64	%w/v	1.78678
Arabinose	10.28	535.66	0.674941	5.74	%w/v	7.5212
Galactose	13.78	370.235	0.502681	3.97	%w/v	4.28993
Glucose	14.87	5290.57	7.70025	56.74	%w/v	23.9447
Xylose	16.21	189.258	0.22943	2.03	%w/v	2.55665
Fructose	17.75	261.432	0.60909	2.8	%w/v	3.97478
Sucrose			0		%w/v	0
Cellobiose			0		%w/v	0
Galacturonic Acid	33.45	929.979	2.34783	9.97	%w/v	26.1631
			Sum	100
130C-8min-Hyd-R1-200x-Rep1
						Dry Weight
Name	RT	Area	Amount	Peak Area Percent	Unit	8.31494
2-Dog	7.22	1959.79	2	19.79	%w/v	% Dry Wt
Rhamnose	8.61	51.9587	0.139785	0.52	%w/v	1.68113
Arabinose	10.03	590.376	0.817788	5.96	%w/v	9.83517
Galactose	13.39	389.587	0.541593	3.93	%w/v	5.04983
Glucose	14.45	5389.73	7.82164	54.44	%w/v	18.3627
Xylose	15.85	174.343	0.231769	1.76	%w/v	2.78738
Fructose	17.54	182.046	0.454231	1.84	%w/v	2.10146
Sucrose			0		%w/v	0
Cellobiose			0		%w/v	0
Galacturonic Acid	33.47	1163.39	2.92061	11.75	%w/v	35.1249
			Sum	100
130C-8min-Hyd-R1-200x-Rep2
						Dry Weight
Name	RT	Area	Amount	Peak Area Percent	Unit	8.31494
2-Dog	7.22	1958.68	2	19.62	%w/v	% Dry Wt
Rhamnose	8.61	53.2313	0.143289	0.53	%w/v	1.72327
Arabinose	10.03	606.004	0.839909	6.07	%w/v	10.1012
Galactose	13.39	390.655	0.543385	3.91	%w/v	5.07139
Glucose	14.45	5413.91	7.86115	54.22	%w/v	18.8379
Xylose	15.85	172.383	0.229293	1.73	%w/v	2.7576
Fructose	17.54	204.694	0.511028	2.05	%w/v	2.78453
Sucrose			0		%w/v	0
Cellobiose			0		%w/v	0
Galacturonic Acid	33.46	1185.16	2.97695	11.87	%w/v	35.8024
			Sum	100
130C-8min-Hyd-R2-200x-Rep1
						Dry Weight
Name	RT	Area	Amount	Peak Area Percent	Unit	8.31494
2-Dog	7.22	1897.83	2	20.16	%w/v	% Dry Wt
Rhamnose	8.61	49.622	0.137856	0.53	%w/v	1.65793
Arabinose	10.03	544.062	0.778237	5.78	%w/v	9.35951
Galactose	13.39	354.472	0.508865	3.77	%w/v	4.65623
Glucose	14.45	5169.78	7.74736	54.93	%w/v	17.4693
Xylose	15.85	151.462	0.207925	1.61	%w/v	2.50062
Fructose	17.54	188.347	0.485295	2	%w/v	2.47505
Sucrose			0		%w/v	0
Cellobiose			0		%w/v	0
Galacturonic Acid	33.46	1055.98	2.7375	11.22	%w/v	32.9226
			Sum	100
130C-8min-Hyd-R2-200x-Rep2
						Dry Weight
Name	RT	Area	Amount	Peak Area Percent	Unit	8.31494
2-Dog	7.22	1923.13	2	20.16	%w/v	% Dry Wt
Rhamnose	8.61	50.9461	0.139673	0.53	%w/v	1.67978
Arabinose	10.03	556.059	0.784936	5.83	%w/v	9.44007
Galactose	13.39	354.011	0.501518	3.71	%w/v	4.56787
Glucose	14.45	5249.27	7.76302	55.04	%w/v	17.6577
Xylose	15.85	153.606	0.208094	1.61	%w/v	2.50265
Fructose	17.54	181.16	0.460638	1.9	%w/v	2.17851
Sucrose			0		%w/v	0
Cellobiose			0		%w/v	0
Galacturonic Acid	33.46	1069.4	2.73585	11.21	%w/v	32.9028
			Sum	100
130C-8min-Hyd-R3-200x-Rep1
						Dry Weight
Name	RT	Area	Amount	Peak Area Percent	Unit	8.31494
2-Dog	7.22	1914.29	2	19.93	%w/v	% Dry Wt
Rhamnose	8.61	51.0337	0.140559	0.53	%w/v	1.69044
Arabinose	10.03	558.985	0.79271	5.82	%w/v	9.53357
Galactose	13.39	364.735	0.519096	3.8	%w/v	4.77927
Glucose	14.45	5270.16	7.82991	54.87	%w/v	18.4621
Xylose	15.85	162.879	0.221675	1.7	%w/v	2.66599
Fructose	17.54	187.863	0.479889	1.96	%w/v	2.41004
Sucrose			0		%w/v	0
Cellobiose			0		%w/v	0
Galacturonic Acid	33.46	1094.08	2.81189	11.39	%w/v	33.8174
			Sum	100
130C-8min-Hyd-R3-200x-Rep2
						Dry Weight
Name	RT	Area	Amount	Peak Area Percent	Unit	8.31494
2-Dog	7.22	1899.6	2	19.92	%w/v	% Dry Wt
Rhamnose	8.61	50.9921	0.141531	0.53	%w/v	1.70213
Arabinose	10.03	562.132	0.803335	5.9	%w/v	9.66135
Galactose	13.39	359.915	0.516196	3.77	%w/v	4.7444
Glucose	14.45	5228.98	7.82878	54.84	%w/v	18.4485
Xylose	15.85	159.47	0.218714	1.67	%w/v	2.63038
Fructose	17.54	187.482	0.482616	1.97	%w/v	2.44283
Sucrose			0		%w/v	0
Cellobiose			0		%w/v	0
Galacturonic Acid	33.45	1086.47	2.81393	11.39	%w/v	33.8419
			Sum	100
150C-1min-Hyd-R1-200x-Rep1
						Dry Weight
Name	RT	Area	Amount	Peak Area Percent	Unit	9.74289
2-Dog	7.44	1985.3	2	18.52	%w/v	% Dry Wt
Rhamnose	8.77	63.0615	0.141457	0.59	%w/v	1.4519
Arabinose	10.23	658.735	0.799841	6.14	%w/v	8.20948
Galactose	13.7	422.987	0.502632	3.95	%w/v	4.13235
Glucose	14.77	5859.64	7.24897	54.66	%w/v	10.2526
Xylose	16.12	209.696	0.224225	1.96	%w/v	2.30142
Fructose	17.7	223.959	0.431426	2.09	%w/v	1.68942
Sucrose			0		%w/v	0
Cellobiose			0		%w/v	0
Galacturonic Acid	33.46	1296.71	2.67587	12.1	%w/v	27.4648
			Sum	100
150C-1min-Hyd-R1-200x-Rep2
						Dry Weight
Name	RT	Area	Amount	Peak Area Percent	Unit	9.74289
2-Dog	7.44	1983.93	2	18.51	%w/v	% Dry Wt
Rhamnose	8.78	58.9542	0.132335	0.55	%w/v	1.35827
Arabinose	10.23	659.242	0.801008	6.15	%w/v	8.22146
Galactose	13.71	424.903	0.505257	3.96	%w/v	4.15929
Glucose	14.78	5860.94	7.25558	54.67	%w/v	10.3204
Xylose	16.13	217.263	0.232477	2.03	%w/v	2.38612
Fructose	17.7	221.702	0.427373	2.07	%w/v	1.64782
Sucrose			0		%w/v	0
Cellobiose			0		%w/v	0
Galacturonic Acid	33.47	1293.41	2.6709	12.07	%w/v	27.4138
			Sum	100
150C-1min-Hyd-R2-200x-Rep1
						Dry Weight
Name	RT	Area	Amount	Peak Area Percent	Unit	9.74289
2-Dog	7.44	1970.15	2	18.35	%w/v	% Dry Wt
Rhamnose	8.78	61.4397	0.138879	0.57	%w/v	1.42544
Arabinose	10.23	656.936	0.803788	6.12	%w/v	8.24999
Galactose	13.71	417.78	0.500261	3.89	%w/v	4.10801
Glucose	14.78	5883.16	7.33401	54.79	%w/v	11.1255
Xylose	16.12	216.441	0.233216	2.02	%w/v	2.3937
Fructose	17.7	229.006	0.444539	2.13	%w/v	1.82401
Sucrose			0		%w/v	0
Cellobiose			0		%w/v	0
Galacturonic Acid	33.47	1303.64	2.71085	12.14	%w/v	27.8239
			Sum	100
150C-1min-Hyd-R2-200x-Rep2
						Dry Weight
Name	RT	Area	Amount	Peak Area Percent	Unit	9.74289
2-Dog	7.44	1968.04	2	18.37	%w/v	% Dry Wt
Rhamnose	8.78	61.9753	0.14024	0.58	%w/v	1.43941
Arabinose	10.23	658.264	0.806277	6.15	%w/v	8.27554
Galactose	13.71	411.041	0.492719	3.84	%w/v	4.0306
Glucose	14.78	5879.52	7.33734	54.89	%w/v	11.1597
Xylose	16.12	216.876	0.233936	2.02	%w/v	2.40109
Fructose	17.69	218.891	0.425361	2.04	%w/v	1.62717
Sucrose			0		%w/v	0
Cellobiose			0		%w/v	0
Galacturonic Acid	33.47	1296.12	2.6981	12.1	%w/v	27.693
			Sum	100
150C-1min-Hyd-R3-200x-Rep1
						Dry Weight
Name	RT	Area	Amount	Peak Area Percent	Unit	9.74289
2-Dog	7.44	1987.75	2	18.01	%w/v	% Dry Wt
Rhamnose	8.78	65.599	0.146967	0.59	%w/v	1.50845
Arabinose	10.23	691.366	0.838425	6.26	%w/v	8.6055
Galactose	13.7	437.116	0.51878	3.96	%w/v	4.29809
Glucose	14.77	6017.44	7.43499	54.52	%w/v	12.1619
Xylose	16.11	231.068	0.246773	2.09	%w/v	2.53285
Fructose	17.69	231.549	0.445496	2.1	%w/v	1.83383
Sucrose			0		%w/v	0
Cellobiose			0		%w/v	0
Galacturonic Acid	33.47	1376.21	2.83641	12.47	%w/v	29.1126
			Sum	100
150C-1min-Hyd-R3-200x-Rep2
						Dry Weight
Name	RT	Area	Amount	Peak Area Percent	Unit	9.74289
2-Dog	7.43	1986.3	2	18.07	%w/v	% Dry Wt
Rhamnose	8.77	66.5921	0.149301	0.61	%w/v	1.53241
Arabinose	10.23	688.891	0.836033	6.27	%w/v	8.58095
Galactose	13.7	432.203	0.513323	3.93	%w/v	4.24208
Glucose	14.77	6001.8	7.42108	54.6	%w/v	12.0191
Xylose	16.11	224.204	0.239618	2.04	%w/v	2.45941
Fructose	17.69	223.606	0.430528	2.03	%w/v	1.6802
Sucrose			0		%w/v	0
Cellobiose			0		%w/v	0
Galacturonic Acid	33.47	1368.95	2.8235	12.45	%w/v	28.9801
			Sum	100
150C-2min-Hyd-R1-200x-Rep1
						Dry Weight
Name	RT	Area	Amount	Peak Area Percent	Unit	7.39319
2-Dog	7.47	2119.12	2	19.89	%w/v	% Dry Wt
Rhamnose	8.84	57.5234	0.122226	0.54	%w/v	1.65323
Arabinose	10.32	471.711	0.577145	4.43	%w/v	7.80645
Galactose	13.82	364.692	0.419107	3.42	%w/v	4.05908
Glucose	14.88	6286.06	7.4146	58.99	%w/v	18.5219
Xylose	16.22	209.256	0.222936	1.96	%w/v	3.01543
Fructose	17.82	218.863	0.402683	2.05	%w/v	2.11036
Sucrose			0		%w/v	0
Cellobiose			0		%w/v	0
Galacturonic Acid	33.49	929.409	2.03116	8.72	%w/v	27.4734
			Sum	100
150C-2min-Hyd-R1-200x-Rep2
						Dry Weight
Name	RT	Area	Amount	Peak Area Percent	Unit	7.39319
2-Dog	7.48	2117.6	2	19.89	%w/v	% Dry Wt
Rhamnose	8.85	58.3411	0.124052	0.55	%w/v	1.67792
Arabinose	10.32	467.654	0.572591	4.39	%w/v	7.74485
Galactose	13.84	368.702	0.424019	3.46	%w/v	4.12552
Glucose	14.9	6289.1	7.42352	59.08	%w/v	18.6426
Xylose	16.23	205.689	0.219293	1.93	%w/v	2.96615
Fructose	17.84	215.966	0.397639	2.03	%w/v	2.04213
Sucrose			0		%w/v	0
Cellobiose			0		%w/v	0
Galacturonic Acid	33.49	922.561	2.01764	8.67	%w/v	27.2906
			Sum	100
150C-2min-Hyd-R2-200x-Rep1
						Dry Weight
Name	RT	Area	Amount	Peak Area Percent	Unit	7.39319
2-Dog	7.48	2136.1	2	20.18	%w/v	% Dry Wt
Rhamnose	8.84	56.3144	0.118706	0.53	%w/v	1.60561
Arabinose	10.32	471.804	0.572669	4.46	%w/v	7.7459
Galactose	13.84	369.815	0.421615	3.49	%w/v	4.093
Glucose	14.9	6225.81	7.28515	58.81	%w/v	16.7709
Xylose	16.24	200.575	0.211988	1.89	%w/v	2.86734
Fructose	17.84	211.221	0.385532	2	%w/v	1.87837
Sucrose			0		%w/v	0
Cellobiose			0		%w/v	0
Galacturonic Acid	33.49	913.815	1.9812	8.63	%w/v	26.7977
			Sum	100
150C-2min-Hyd-R2-200x-Rep2
						Dry Weight
Name	RT	Area	Amount	Peak Area Percent	Unit	7.39319
2-Dog	7.48	2147.81	2	20.25	%w/v	% Dry Wt
Rhamnose	8.84	58.4385	0.122511	0.55	%w/v	1.65708
Arabinose	10.32	467.56	0.564422	4.41	%w/v	7.63435
Galactose	13.84	361.394	0.409767	3.41	%w/v	3.93274
Glucose	14.89	6240.89	7.26297	58.84	%w/v	16.4711
Xylose	16.23	206.588	0.217153	1.95	%w/v	2.9372
Fructose	17.84	207.156	0.376052	1.95	%w/v	1.75015
Sucrose			0		%w/v	0
Cellobiose			0		%w/v	0
Galacturonic Acid	33.49	916.361	1.97589	8.64	%w/v	26.7258
			Sum	100
150C-2min-Hyd-R3-200x-Rep1
						Dry Weight
Name	RT	Area	Amount	Peak Area Percent	Unit	7.39319
2-Dog	7.48	2111	2	19.84	%w/v	% Dry Wt
Rhamnose	8.85	58.0998	0.123925	0.55	%w/v	1.67621
Arabinose	10.32	476.366	0.585081	4.48	%w/v	7.91379
Galactose	13.84	357.174	0.412045	3.36	%w/v	3.96356
Glucose	14.9	6311.53	7.47328	59.31	%w/v	19.3156
Xylose	16.23	197.486	0.211205	1.86	%w/v	2.85675
Fructose	17.84	209.355	0.386671	1.97	%w/v	1.89378
Sucrose			0		%w/v	0
Cellobiose			0		%w/v	0
Galacturonic Acid	33.49	920.945	2.0204	8.65	%w/v	27.3279
			Sum	100
150C-2min-Hyd-R3-200x-Rep2
						Dry Weight
Name	RT	Area	Amount	Peak Area Percent	Unit	7.39319
2-Dog	7.48	2102.13	2	19.77	%w/v	% Dry Wt
Rhamnose	8.85	60.0918	0.128715	0.57	%w/v	1.741
Arabinose	10.33	471.464	0.581505	4.43	%w/v	7.86542
Galactose	13.84	360.003	0.417063	3.39	%w/v	4.03143
Glucose	14.9	6297.97	7.4887	59.23	%w/v	19.5242
Xylose	16.23	211.532	0.227182	1.99	%w/v	3.07286
Fructose	17.84	214.105	0.397112	2.01	%w/v	2.035
Sucrose			0		%w/v	0
Cellobiose			0		%w/v	0
Galacturonic Acid	33.49	915.824	2.01765	8.61	%w/v	27.2907
			Sum	100
150C-4min-Hyd-R1-200x-Rep1
						Dry Weight
Name	RT	Area	Amount	Peak Area Percent	Unit	5.21675
2-Dog	7.47	1737.87	2	20.91	%w/v	% Dry Wt
Rhamnose	8.85	31.6456	0.083264	0.38	%w/v	1.59609
Arabinose	10.28	284.119	0.347863	3.42	%w/v	6.66819
Galactose	13.78	239.348	0.315773	2.88	%w/v	3.79668
Glucose	14.88	5241.66	7.41313	63.07	%w/v	35.6859
Xylose	16.21	146.382	0.17243	1.76	%w/v	3.30531
Fructose	17.77	190.814	0.431981	2.3	%w/v	3.4424
Sucrose			0		%w/v	0
Cellobiose			0		%w/v	0
Galacturonic Acid	33.45	438.755	1.07633	5.28	%w/v	20.6323
			Sum	100
150C-4min-Hyd-R1-200x-Rep2
						Dry Weight
Name	RT	Area	Amount	Peak Area Percent	Unit	5.21675
2-Dog	7.47	1739.01	2	20.49	%w/v	% Dry Wt
Rhamnose	8.84	35.9524	0.094534	0.42	%w/v	1.81212
Arabinose	10.28	284.125	0.347642	3.35	%w/v	6.66396
Galactose	13.77	241.264	0.318094	2.84	%w/v	3.84117
Glucose	14.87	5280.56	7.46327	62.21	%w/v	36.647
Xylose	16.2	148.911	0.175295	1.75	%w/v	3.36023
Fructose	17.76	187.231	0.423593	2.21	%w/v	3.28161
Sucrose			0		%w/v	0
Cellobiose			0		%w/v	0
Galacturonic Acid	33.45	443.294	1.08676	5.22	%w/v	20.8321
			Sum	98.49
150C-4min-Hyd-R2-200x-Rep1
						Dry Weight
Name	RT	Area	Amount	Peak Area Percent	Unit	5.21675
2-Dog	7.47	1738.26	2	21.09	%w/v	% Dry Wt
Rhamnose	8.84	34.2279	0.090038	0.42	%w/v	1.72594
Arabinose	10.28	283.987	0.347623	3.45	%w/v	6.66359
Galactose	13.78	243.21	0.320796	2.95	%w/v	3.89297
Glucose	14.88	5172.25	7.31333	62.75	%w/v	33.7728
Xylose	16.21	144.024	0.169615	1.75	%w/v	3.25135
Fructose	17.77	186.524	0.422175	2.26	%w/v	3.25443
Sucrose			0		%w/v	0
Cellobiose			0		%w/v	0
Galacturonic Acid	33.45	440.375	1.08007	5.34	%w/v	20.7038
			Sum	100
150C-4min-Hyd-R2-200x-Rep2
						Dry Weight
Name	RT	Area	Amount	Peak Area Percent	Unit	5.21675
2-Dog	7.48	1753.26	2	21.06	%w/v	% Dry Wt
Rhamnose	8.85	33.9476	0.088537	0.41	%w/v	1.69717
Arabinose	10.29	288.45	0.350065	3.46	%w/v	6.7104
Galactose	13.79	245.561	0.321127	2.95	%w/v	3.89931
Glucose	14.88	5226.14	7.32631	62.76	%w/v	34.0216
Xylose	16.22	147.589	0.172326	1.77	%w/v	3.30332
Fructose	17.77	183.973	0.412838	2.21	%w/v	3.07545
Sucrose			0		%w/v	0
Cellobiose			0		%w/v	0
Galacturonic Acid	33.45	448.125	1.08967	5.38	%w/v	20.8879
			Sum	100
150C-4min-Hyd-R3-200x-Rep1
						Dry Weight
Name	RT	Area	Amount	Peak Area Percent	Unit	5.21675
2-Dog	7.48	1745.89	2	21.06	%w/v	% Dry Wt
Rhamnose	8.86	35.9746	0.09422	0.43	%w/v	1.8061
Arabinose	10.29	286.362	0.348998	3.45	%w/v	6.68995
Galactose	13.8	242.282	0.318176	2.92	%w/v	3.84275
Glucose	14.89	5206.95	7.33022	62.8	%w/v	34.0965
Xylose	16.22	151.062	0.177126	1.82	%w/v	3.39533
Fructose	17.77	177.818	0.40071	2.14	%w/v	2.84297
Sucrose			0		%w/v	0
Cellobiose			0		%w/v	0
Galacturonic Acid	33.45	444.98	1.08659	5.37	%w/v	20.8289
			Sum	100
150C-4min-Hyd-R3-200x-Rep2
						Dry Weight
Name	RT	Area	Amount	Peak Area Percent	Unit	5.21675
2-Dog	7.47	1742.63	2	20.98	%w/v	% Dry Wt
Rhamnose	8.85	38.6086	0.101308	0.46	%w/v	1.94197
Arabinose	10.29	285.901	0.349089	3.44	%w/v	6.69169
Galactose	13.79	245.93	0.323571	2.96	%w/v	3.94616
Glucose	14.88	5213.41	7.35306	62.78	%w/v	34.5343
Xylose	16.21	146.231	0.171782	1.76	%w/v	3.29289
Fructose	17.76	186.856	0.421865	2.25	%w/v	3.24849
Sucrose			0		%w/v	0
Cellobiose			0		%w/v	0
Galacturonic Acid	33.45	445.214	1.0892	5.36	%w/v	20.8789
			Sum	100
150C-8min-Hyd-R1-200x-Rep1
						Dry Weight
Name	RT	Area	Amount	Peak Area Percent	Unit	6.54118
2-Dog	7.2	2141.66	2	19.99	%w/v	% Dry Wt
Rhamnose	8.62	61.2687	0.116847	0.57	%w/v	1.78633
Arabinose	10	367.494	0.393455	3.43	%w/v	6.01505
Galactose	13.34	372.598	0.392613	3.48	%w/v	4.33939
Glucose	14.42	6464.71	7.1774	60.34	%w/v	28.4701
Xylose	15.82	227.441	0.212292	2.12	%w/v	3.24547
Fructose	17.49	280.076	0.418459	2.61	%w/v	2.50206
Sucrose			0		%w/v	0
Cellobiose			0		%w/v	0
Galacturonic Acid	33.64	798.632	1.44504	7.45	%w/v	22.0915
			Sum	100
150C-8min-Hyd-R1-200x-Rep2
						Dry Weight
Name	RT	Area	Amount	Peak Area Percent	Unit	6.54118
2-Dog	7.2	2148.57	2	19.96	%w/v	% Dry Wt
Rhamnose	8.63	70.54	0.134096	0.66	%w/v	2.05003
Arabinose	10.01	367.708	0.392417	3.42	%w/v	5.99918
Galactose	13.34	387.68	0.407192	3.6	%w/v	4.56227
Glucose	14.42	6495.82	7.18873	60.34	%w/v	28.6433
Xylose	15.83	218.22	0.20303	2.03	%w/v	3.10387
Fructose	17.5	271.057	0.40368	2.52	%w/v	2.27612
Sucrose			0		%w/v	0
Cellobiose			0		%w/v	0
Galacturonic Acid	33.63	805.166	1.45218	7.48	%w/v	22.2005
			Sum	100
150C-8min-Hyd-R2-200x-Rep1
						Dry Weight
Name	RT	Area	Amount	Peak Area Percent	Unit	6.54118
2-Dog	7.2	2156.41	2	19.91	%w/v	% Dry Wt
Rhamnose	8.63	69.0603	0.130805	0.64	%w/v	1.99972
Arabinose	10.01	374.748	0.398476	3.46	%w/v	6.09181
Galactose	13.34	386.354	0.404323	3.57	%w/v	4.51841
Glucose	14.43	6543.51	7.21518	60.41	%w/v	29.0477
Xylose	15.83	213.04	0.19749	1.97	%w/v	3.01918
Fructose	17.49	280.433	0.416125	2.59	%w/v	2.46637
Sucrose			0		%w/v	0
Cellobiose			0		%w/v	0
Galacturonic Acid	33.63	807.668	1.45139	7.46	%w/v	22.1886
			Sum	100
150C-8min-Hyd-R2-200x-Rep2
						Dry Weight
Name	RT	Area	Amount	Peak Area Percent	Unit	6.54118
2-Dog	7.2	2168.08	2	19.87	%w/v	% Dry Wt
Rhamnose	8.63	68.485	0.129017	0.63	%w/v	1.97238
Arabinose	10.01	376.233	0.397902	3.45	%w/v	6.08303
Galactose	13.34	384.961	0.400697	3.53	%w/v	4.46297
Glucose	14.43	6582.54	7.21916	60.34	%w/v	29.1085
Xylose	15.83	226.924	0.209228	2.08	%w/v	3.19863
Fructose	17.49	282.689	0.417216	2.59	%w/v	2.48305
Sucrose			0		%w/v	0
Cellobiose			0		%w/v	0
Galacturonic Acid	33.63	819.357	1.46447	7.51	%w/v	22.3885
			Sum	100
150C-8min-Hyd-R3-200x-Rep1
						Dry Weight
Name	RT	Area	Amount	Peak Area Percent	Unit	6.54118
2-Dog	7.2	2154.74	2	19.84	%w/v	% Dry Wt
Rhamnose	8.63	72.4915	0.13741	0.67	%w/v	2.10069
Arabinose	10.01	372.705	0.39661	3.43	%w/v	6.06328
Galactose	13.35	388.327	0.406703	3.58	%w/v	4.55479
Glucose	14.43	6560.59	7.23961	60.41	%w/v	29.4212
Xylose	15.83	233.449	0.216577	2.15	%w/v	3.31098
Fructose	17.5	279.038	0.414376	2.57	%w/v	2.43964
Sucrose			0		%w/v	0
Cellobiose			0		%w/v	0
Galacturonic Acid	33.62	799.322	1.43751	7.36	%w/v	21.9763
			Sum	100
150C-8min-Hyd-R3-200x-Rep2
						Dry Weight
Name	RT	Area	Amount	Peak Area Percent	Unit	6.54118
2-Dog	7.21	2165.72	2	19.86	%w/v	% Dry Wt
Rhamnose	8.63	72.4229	0.136585	0.66	%w/v	2.08808
Arabinose	10.01	374.446	0.396444	3.43	%w/v	6.06074
Galactose	13.35	387.885	0.404181	3.56	%w/v	4.51623
Glucose	14.43	6583.41	7.22799	60.37	%w/v	29.2436
Xylose	15.83	229.587	0.211914	2.11	%w/v	3.23969
Fructose	17.5	282.525	0.417428	2.59	%w/v	2.48629
Sucrose			0		%w/v	0
Cellobiose			0		%w/v	0
Galacturonic Acid	33.62	809.262	1.44801	7.42	%w/v	22.1368
			Sum	100
170C-1min-Hyd-R1-200x-Rep1
						Dry Weight
Name	RT	Area	Amount	Peak Area Percent	Unit	5.79598
2-Dog	7.47	1957.28	2	19.96	%w/v	% Dry Wt
Rhamnose	8.83	53.2727	0.1219	0.54	%w/v	2.10318
Arabinose	10.3	365.702	0.457672	3.73	%w/v	7.89637
Galactose	13.8	293.146	0.353812	2.99	%w/v	4.30581
Glucose	14.87	6136.95	7.61214	62.57	%w/v	25.7348
Xylose	16.21	170.801	0.185286	1.74	%w/v	3.1968
Fructose	17.78	242.343	0.460411	2.47	%w/v	3.08523
Sucrose			0		%w/v	0
Cellobiose			0		%w/v	0
Galacturonic Acid	33.47	587.904	1.275	5.99	%w/v	21.9981
			Sum	100
170C-1min-Hyd-R1-200x-Rep2
						Dry Weight
Name	RT	Area	Amount	Peak Area Percent	Unit	5.79598
2-Dog	7.47	1959.53	2	19.93	%w/v	% Dry Wt
Rhamnose	8.83	47.1233	0.107705	0.48	%w/v	1.85827
Arabinose	10.3	365.984	0.457499	3.72	%w/v	7.89339
Galactose	13.8	296.108	0.356977	3.01	%w/v	4.36042
Glucose	14.88	6156.63	7.62779	62.62	%w/v	26.0048
Xylose	16.22	172.249	0.186643	1.75	%w/v	3.22022
Fructose	17.79	246.972	0.468666	2.51	%w/v	3.22765
Sucrose			0		%w/v	0
Cellobiose			0		%w/v	0
Galacturonic Acid	33.47	586.796	1.27114	5.97	%w/v	21.9315
			Sum	100
170C-1min-Hyd-R2-200x-Rep1
						Dry Weight
Name	RT	Area	Amount	Peak Area Percent	Unit	5.79598
2-Dog	7.46	1960.71	2	20.22	%w/v	% Dry Wt
Rhamnose	8.83	50.6082	0.115601	0.52	%w/v	1.9945
Arabinose	10.29	357.727	0.446908	3.69	%w/v	7.71066
Galactose	13.79	303.535	0.36571	3.13	%w/v	4.51109
Glucose	14.86	6034.18	7.47159	62.22	%w/v	23.3097
Xylose	16.2	172.29	0.186574	1.78	%w/v	3.21903
Fructose	17.78	244.525	0.463744	2.52	%w/v	3.14273
Sucrose			0		%w/v	0
Cellobiose			0		%w/v	0
Galacturonic Acid	33.47	574.25	1.24322	5.92	%w/v	21.4496
			Sum	100
170C-1min-Hyd-R2-200x-Rep2
						Dry Weight
Name	RT	Area	Amount	Peak Area Percent	Unit	5.79598
2-Dog	7.46	1967.73	2	20.29	%w/v	% Dry Wt
Rhamnose	8.83	45.7953	0.104234	0.47	%w/v	1.79838
Arabinose	10.3	357.835	0.445449	3.69	%w/v	7.68548
Galactose	13.79	299.838	0.359967	3.09	%w/v	4.41201
Glucose	14.87	6042.93	7.45573	62.31	%w/v	23.0362
Xylose	16.2	163.433	0.176352	1.69	%w/v	3.04266
Fructose	17.78	245.585	0.464094	2.53	%w/v	3.14877
Sucrose			0		%w/v	0
Cellobiose			0		%w/v	0
Galacturonic Acid	33.47	574.876	1.24013	5.93	%w/v	21.3964
			Sum	100
170C-1min-Hyd-R3-200x-Rep1
						Dry Weight
Name	RT	Area	Amount	Peak Area Percent	Unit	5.79598
2-Dog	7.47	1958.15	2	19.86	%w/v	% Dry Wt
Rhamnose	8.83	48.4791	0.110882	0.49	%w/v	1.91309
Arabinose	10.3	362.982	0.454065	3.68	%w/v	7.83414
Galactose	13.81	296.917	0.358202	3.01	%w/v	4.38156
Glucose	14.88	6161.81	7.63957	62.49	%w/v	26.2081
Xylose	16.22	188.573	0.204474	1.91	%w/v	3.52786
Fructose	17.79	254.324	0.482957	2.58	%w/v	3.47422
Sucrose			0		%w/v	0
Cellobiose			0		%w/v	0
Galacturonic Acid	33.48	588.487	1.2757	5.97	%w/v	22.0101
			Sum	100
170C-1min-Hyd-R3-200x-Rep2
						Dry Weight
Name	RT	Area	Amount	Peak Area Percent	Unit	5.79598
2-Dog	7.48	1956.73	2	19.89	%w/v	% Dry Wt
Rhamnose	8.84	47.7532	0.109301	0.49	%w/v	1.88581
Arabinose	10.31	364.545	0.456351	3.71	%w/v	7.87358
Galactose	13.81	298.392	0.360244	3.03	%w/v	4.41679
Glucose	14.88	6168.75	7.65374	62.71	%w/v	26.4525
Xylose	16.22	165.758	0.179867	1.69	%w/v	3.10331
Fructose	17.79	250.208	0.475486	2.54	%w/v	3.34532
Sucrose			0		%w/v	0
Cellobiose			0		%w/v	0
Galacturonic Acid	33.48	584.867	1.26877	5.95	%w/v	21.8906
			Sum	100
170C-2min-Hyd-R1-200x-Rep1
						Dry Weight
Name	RT	Area	Amount	Peak Area Percent	Unit	6.87059
2-Dog	7.5	1609.2	2	19.93	%w/v	% Dry Wt
Rhamnose	8.88	38.4694	0.108455	0.48	%w/v	1.57854
Arabinose	10.32	326.96	0.424321	4.05	%w/v	6.1759
Galactose	13.84	295.375	0.417298	3.66	%w/v	4.54418
Glucose	14.93	5090.36	7.69937	63.04	%w/v	27.9153
Xylose	16.26	187.352	0.245268	2.32	%w/v	3.56983
Fructose	17.82	156.139	0.366107	1.93	%w/v	2.12035
Sucrose			0		%w/v	0
Cellobiose			0		%w/v	0
Galacturonic Acid	33.47	371.042	1.51113	4.59	%w/v	21.9942
			Sum	100
170C-2min-Hyd-R1-200x-Rep2
						Dry Weight
Name	RT	Area	Amount	Peak Area Percent	Unit	6.87059
2-Dog	7.5	1617.71	2	19.93	%w/v	% Dry Wt
Rhamnose	8.87	41.3186	0.115875	0.51	%w/v	1.68654
Arabinose	10.32	329.39	0.425227	4.06	%w/v	6.18909
Galactose	13.84	297.778	0.41848	3.67	%w/v	4.56139
Glucose	14.92	5108.88	7.68675	62.94	%w/v	27.7315
Xylose	16.26	192.679	0.250914	2.37	%w/v	3.652
Fructose	17.82	150.393	0.350779	1.85	%w/v	1.89725
Sucrose			0		%w/v	0
Cellobiose			0		%w/v	0
Galacturonic Acid	33.48	378.718	1.53428	4.67	%w/v	22.3312
			Sum	100
170C-2min-Hyd-R2-200x-Rep1
						Dry Weight
Name	RT	Area	Amount	Peak Area Percent	Unit	6.87059
2-Dog	7.5	1614.79	2	20.24	%w/v	% Dry Wt
Rhamnose	8.88	39.6511	0.1114	0.5	%w/v	1.6214
Arabinose	10.32	317.407	0.410498	3.98	%w/v	5.97471
Galactose	13.84	288.21	0.405765	3.61	%w/v	4.37632
Glucose	14.93	5012.76	7.55575	62.81	%w/v	25.8248
Xylose	16.26	180.233	0.23513	2.26	%w/v	3.42227
Fructose	17.82	153.221	0.358019	1.92	%w/v	2.00263
Sucrose			0		%w/v	0
Cellobiose			0		%w/v	0
Galacturonic Acid	33.48	373.922	1.51759	4.69	%w/v	22.0882
			Sum	100
170C-2min-Hyd-R2-200x-Rep2
						Dry Weight
Name	RT	Area	Amount	Peak Area Percent	Unit	6.87059
2-Dog	7.5	1620.96	2	20.25	%w/v	% Dry Wt
Rhamnose	8.88	37.0358	0.103656	0.46	%w/v	1.50869
Arabinose	10.32	318.921	0.410887	3.98	%w/v	5.98038
Galactose	13.84	291.995	0.409531	3.65	%w/v	4.43113
Glucose	14.92	5023.25	7.54277	62.75	%w/v	25.6359
Xylose	16.26	184.341	0.239575	2.3	%w/v	3.48696
Fructose	17.82	151.613	0.352916	1.89	%w/v	1.92836
Sucrose			0		%w/v	0
Cellobiose			0		%w/v	0
Galacturonic Acid	33.48	376.688	1.523	4.71	%w/v	22.167
			Sum	100
170C-2min-Hyd-R3-200x-Rep1
						Dry Weight
Name	RT	Area	Amount	Peak Area Percent	Unit	6.87059
2-Dog	7.5	1637.16	2	19.72	%w/v	% Dry Wt
Rhamnose	8.88	36.5109	0.101176	0.44	%w/v	1.4726
Arabinose	10.32	335.87	0.428443	4.05	%w/v	6.2359
Galactose	13.84	304.115	0.422309	3.66	%w/v	4.61712
Glucose	14.92	5230.53	7.77631	63	%w/v	29.035
Xylose	16.26	190.083	0.244594	2.29	%w/v	3.56002
Fructose	17.82	162.411	0.37431	1.96	%w/v	2.23974
Sucrose			0		%w/v	0
Cellobiose			0		%w/v	0
Galacturonic Acid	33.47	405.768	1.62435	4.89	%w/v	23.642
			Sum	100
170C-2min-Hyd-R3-200x-Rep2
						Dry Weight
Name	RT	Area	Amount	Peak Area Percent	Unit	6.87059
2-Dog	7.5	1638.53	2	19.77	%w/v	% Dry Wt
Rhamnose	8.88	38.5173	0.106646	0.46	%w/v	1.55221
Arabinose	10.32	335.906	0.428128	4.05	%w/v	6.23132
Galactose	13.85	303.462	0.421048	3.66	%w/v	4.59876
Glucose	14.93	5218.37	7.7517	62.97	%w/v	28.6769
Xylose	16.27	186.776	0.240136	2.25	%w/v	3.49513
Fructose	17.82	158.402	0.364763	1.91	%w/v	2.10079
Sucrose			0		%w/v	0
Cellobiose			0		%w/v	0
Galacturonic Acid	33.47	407.15	1.62851	4.91	%w/v	23.7026
			Sum	100
170C-4min-Hyd-R1-200x-Rep1
						Dry Weight
Name	RT	Area	Amount	Peak Area Percent	Unit	3.45436
2-Dog	7.21	2214.82	2	22.49	%w/v	% Dry Wt
Rhamnose	8.63	44.8953	0.082793	0.46	%w/v	2.39677
Arabinose	10.02	146.934	0.152117	1.49	%w/v	4.40362
Galactose	13.35	296.171	0.301773	3.01	%w/v	5.58735
Glucose	14.44	6424.78	6.89745	65.25	%w/v	45.8067
Xylose	15.83	186.743	0.168547	1.9	%w/v	4.87925
Fructose	17.5	264.539	0.382189	2.69	%w/v	3.68792
Sucrose			0		%w/v	0
Cellobiose			0		%w/v	0
Galacturonic Acid	33.62	267.116	0.467354	2.71	%w/v	13.5294
			Sum	100
170C-4min-Hyd-R1-200x-Rep2
						Dry Weight
Name	RT	Area	Amount	Peak Area Percent	Unit	3.45436
2-Dog	7.21	2220.19	2	22.55	%w/v	% Dry Wt
Rhamnose	8.63	43.464	0.079959	0.44	%w/v	2.31473
Arabinose	10.01	147.542	0.152377	1.5	%w/v	4.41115
Galactose	13.35	305.395	0.310418	3.1	%w/v	5.83761
Glucose	14.44	6425.61	6.88164	65.27	%w/v	45.349
Xylose	15.83	168.462	0.151679	1.71	%w/v	4.39094
Fructose	17.5	268.529	0.387015	2.73	%w/v	3.82763
Sucrose			0		%w/v	0
Cellobiose			0		%w/v	0
Galacturonic Acid	33.62	265.453	0.46332	2.7	%w/v	13.4126
			Sum	100
170C-4min-Hyd-R2-200x-Rep1
						Dry Weight
Name	RT	Area	Amount	Peak Area Percent	Unit	3.45436
2-Dog	7.21	2228.38	2	22.6	%w/v	% Dry Wt
Rhamnose	8.63	46.2183	0.084713	0.47	%w/v	2.45235
Arabinose	10.01	148.734	0.153044	1.51	%w/v	4.43046
Galactose	13.35	301.715	0.30555	3.06	%w/v	5.69669
Glucose	14.44	6431.64	6.86277	65.22	%w/v	44.8029
Xylose	15.83	175.497	0.157432	1.78	%w/v	4.55749
Fructose	17.5	265.489	0.381227	2.69	%w/v	3.66007
Sucrose			0		%w/v	0
Cellobiose			0		%w/v	0
Galacturonic Acid	33.62	263.099	0.457524	2.67	%w/v	13.2448
			Sum	100
170C-4min-Hyd-R2-200x-Rep2
						Dry Weight
Name	RT	Area	Amount	Peak Area Percent	Unit	3.45436
2-Dog	7.21	2237.56	2	22.63	%w/v	% Dry Wt
Rhamnose	8.63	44.0192	0.080352	0.45	%w/v	2.3261
Arabinose	10.02	146.645	0.150275	1.48	%w/v	4.3503
Galactose	13.36	304.449	0.307054	3.08	%w/v	5.74022
Glucose	14.45	6439.4	6.8429	65.11	%w/v	44.2274
Xylose	15.84	183.974	0.16436	1.86	%w/v	4.75805
Fructose	17.5	267.416	0.382419	2.7	%w/v	3.69458
Sucrose			0		%w/v	0
Cellobiose			0		%w/v	0
Galacturonic Acid	33.61	266.029	0.460722	2.69	%w/v	13.3374
			Sum	100
170C-4min-Hyd-R3-200x-Rep1
						Dry Weight
Name	RT	Area	Amount	Peak Area Percent	Unit	3.45436
2-Dog	7.21	2232.79	2	22.65	%w/v	% Dry Wt
Rhamnose	8.63	47.3396	0.086598	0.48	%w/v	2.50692
Arabinose	10.02	146.889	0.150848	1.49	%w/v	4.36689
Galactose	13.35	293.161	0.296302	2.97	%w/v	5.42897
Glucose	14.44	6421.16	6.83809	65.14	%w/v	44.0883
Xylose	15.84	191.36	0.171324	1.94	%w/v	4.95965
Fructose	17.51	265.499	0.380489	2.69	%w/v	3.63871
Sucrose			0		%w/v	0
Cellobiose			0		%w/v	0
Galacturonic Acid	33.61	258.647	0.448895	2.62	%w/v	12.995
			Sum	100
170C-4min-Hyd-R3-200x-Rep2
						Dry Weight
Name	RT	Area	Amount	Peak Area Percent	Unit	3.45436
2-Dog	7.21	2242.04	2	22.65	%w/v	% Dry Wt
Rhamnose	8.63	47.1332	0.085864	0.48	%w/v	2.48567
Arabinose	10.02	146.165	0.149484	1.48	%w/v	4.3274
Galactose	13.36	305.322	0.307319	3.08	%w/v	5.7479
Glucose	14.45	6461.5	6.85263	65.26	%w/v	44.5093
Xylose	15.84	179.777	0.160289	1.82	%w/v	4.64019
Fructose	17.51	258.084	0.368336	2.61	%w/v	3.28689
Sucrose			0		%w/v	0
Cellobiose			0		%w/v	0
Galacturonic Acid	33.61	260.769	0.450709	2.63	%w/v	13.0475
			Sum	100
170C-8min-Hyd-R1-200x-Rep1
						Dry Weight
Name	RT	Area	Amount	Peak Area Percent	Unit	2.1008
2-Dog	7.41	1442.16	2	27.75	%w/v	% Dry Wt
Rhamnose	8.79	3.3986	0.010972	0.07	%w/v	0.522277
Arabinose	10.27	28.9513	0.042104	0.56	%w/v	2.00419
Galactose	13.69	112.654	0.182578	2.17	%w/v	4.55998
Glucose	14.74	3440.15	6.06747	66.19	%w/v	25.143
Xylose	16.1	64.5768	0.094187	1.24	%w/v	4.48339
Fructose	17.81	72.9315	0.187387	1.4	%w/v	0
Sucrose			0		%w/v	0
Cellobiose			0		%w/v	0
Galacturonic Acid	33.46	32.5331	0.139249	0.63	%w/v	6.62838
			Sum	100
170C-8min-Hyd-R1-200x-Rep2
						Dry Weight
Name	RT	Area	Amount	Peak Area Percent	Unit	2.1008
2-Dog	7.41	1444.81	2	27.82	%w/v	% Dry Wt
Rhamnose	8.78	3.4916	0.011252	0.07	%w/v	0.535605
Arabinose	10.26	29.8131	0.043277	0.57	%w/v	2.06002
Galactose	13.71	113.195	0.183118	2.18	%w/v	4.58568
Glucose	14.74	3429.63	6.03783	66.04	%w/v	23.7322
Xylose	16.1	65.1386	0.094832	1.25	%w/v	4.51409
Fructose	17.82	73.5283	0.188574	1.42	%w/v	0.0182549
Sucrose			0		%w/v	0
Cellobiose			0		%w/v	0
Galacturonic Acid	33.45	33.7695	0.144276	0.65	%w/v	6.86767
			Sum	100
170C-8min-Hyd-R2-200x-Rep1
						Dry Weight
Name	RT	Area	Amount	Peak Area Percent	Unit	2.1008
2-Dog	7.41	1416.06	2	27.54	%w/v	% Dry Wt
Rhamnose	8.78	3.1055	0.01021	0.06	%w/v	0.486005
Arabinose	10.26	29.3749	0.043507	0.57	%w/v	2.07097
Galactose	13.7	114.26	0.188596	2.22	%w/v	4.84644
Glucose	14.74	3412.82	6.13023	66.37	%w/v	28.1304
Xylose	16.1	62.2358	0.092445	1.21	%w/v	4.40046
Fructose	17.82	70.1288	0.183507	1.36	%w/v	0
Sucrose			0		%w/v	0
Cellobiose			0		%w/v	0
Galacturonic Acid	33.46	34.2303	0.149214	0.67	%w/v	7.10272
			Sum	100
170C-8min-Hyd-R2-200x-Rep2
						Dry Weight
Name	RT	Area	Amount	Peak Area Percent	Unit	2.1008
2-Dog	7.41	1408.61	2	27.41	%w/v	% Dry Wt
Rhamnose	8.82	3.9239	0.01297	0.08	%w/v	0.617384
Arabinose	10.27	30.0829	0.044792	0.59	%w/v	2.13214
Galactose	13.71	107.396	0.178203	2.09	%w/v	4.35172
Glucose	14.74	3414.85	6.16632	66.46	%w/v	29.8485
Xylose	16.08	69.0676	0.103136	1.34	%w/v	4.90937
Fructose	17.81	70.5404	0.185561	1.37	%w/v	0
Sucrose			0		%w/v	0
Cellobiose			0		%w/v	0
Galacturonic Acid	33.46	33.8447	0.148314	0.66	%w/v	7.05988
			Sum	100
170C-8min-Hyd-R3-200x-Rep1
						Dry Weight
Name	RT	Area	Amount	Peak Area Percent	Unit	2.1008
2-Dog	7.41	1427.98	2	27.69	%w/v	% Dry Wt
Rhamnose	8.8	3.6369	0.011858	0.07	%w/v	0.564451
Arabinose	10.27	28.8513	0.042375	0.56	%w/v	2.01709
Galactose	13.7	111.663	0.18277	2.17	%w/v	4.56911
Glucose	14.74	3416.28	6.0852	66.25	%w/v	25.9869
Xylose	16.09	66.9782	0.098659	1.3	%w/v	4.69626
Fructose	17.82	67.8667	0.176105	1.32	%w/v	0
Sucrose			0		%w/v	0
Cellobiose			0		%w/v	0
Galacturonic Acid	33.46	33.74	0.145849	0.65	%w/v	6.94254
			Sum	100
170C-8min-Hyd-R3-200x-Rep2
						Dry Weight
Name	RT	Area	Amount	Peak Area Percent	Unit	2.1008
2-Dog	7.4	1423.31	2	27.74	%w/v	% Dry Wt
Rhamnose	8.77	3.5103	0.011483	0.07	%w/v	0.546601
Arabinose	10.25	30.7313	0.045284	0.6	%w/v	2.15556
Galactose	13.69	109.999	0.180635	2.14	%w/v	4.46749
Glucose	14.72	3398.13	6.07273	66.23	%w/v	25.3932
Xylose	16.09	63.1998	0.093399	1.23	%w/v	4.44588
Fructose	17.81	68.3311	0.177892	1.33	%w/v	0
Sucrose			0		%w/v	0
Cellobiose			0		%w/v	0
Galacturonic Acid	33.45	33.9047	0.147041	0.66	%w/v	6.99928
			Sum	100

## Sheet: Compositinal GalA
	Sample Name	Treatment	Rhamnose	SD	RSD	Arabinose	SD2	RSD3	Galactose	SD4	RSD5	Glucose	SD6	RSD7	Xylose	SD8	RSD9	Fructose	SD10	RSD11	Sucrose	SD12	RSD13	Cellobiose	SD14	RSD15	Galacturonic Acid	SD16	RSD17	Treatment2	Total Sugars
Commercial	COM-Citrus Fiber	CitraFiber	1.44314	0.0418942	2.90299	10.2303	0.318972	3.1179	5.33179	0.220867	4.14246	18.0675	1.17461	6.50125	2.36995	0.157712	6.65464	0.177832	0.0105055	5.90753	0	0	#DIV/0!	0	0	#DIV/0!	33.0024	1.23309	3.73636	CitraFiber	37.6206
	COM-Orange Peel Powder	CE OR	1.31742	0.0351192	2.66575	6.40689	0.0415493	0.64851	3.03872	0.00557993	0.183628	14.7795	0.403318	2.7289	1.59026	0.0485584	3.05348	8.6412	0.112362	1.3003	0	0	#DIV/0!	0	0	#DIV/0!	18.9953	0.0646348	0.340267	CE OR	35.774
	COM-Lemon Peel Powder	CE LN	1.04458	0.0418942	4.01061	10.2303	0.318972	3.1179	5.33179	0.220867	4.14246	18.0675	1.17461	6.50125	2.36995	0.157712	6.65464	0.177832	0.0105055	5.90753	0	0	#DIV/0!	0	0	#DIV/0!	28.1576	1.23309	4.37924	CE LN	37.222
Untreated	H-UNT-12-11-20	12/11/20 Raw	1.66819	0.0998126	5.98329	5.11237	0.169545	3.31637	3.03461	0.145352	4.78982	16.8613	1.44517	8.57092	1.47941	0.07913	5.34875	11.9861	0.652196	5.44126	0	0	#DIV/0!	0	0	#DIV/0!	16.8692	0.656278	3.8904	12/11/20 Raw	40.142
	H-UNT-1-12-21	1/12/21 Raw	1.47752	0.056228	3.80556	5.66729	0.253443	4.47204	2.74126	0.109026	3.97721	16.3635	1.43326	8.75891	1.46858	0.0931735	6.34447	8.43446	0.655871	7.77608	0	0	#DIV/0!	0	0	#DIV/0!	16.3873	0.753289	4.59679	1/12/21 Raw	36.1526
	H-UNT-1-22-21	1/22/21 Raw	1.5905	0.0336987	2.11875	4.47198	0.0792199	1.77147	2.33745	0.0199587	0.853867	14.6773	1.42203	9.68867	1.42112	0.111442	7.84184	10.4867	0.677121	6.45697	0	0	#DIV/0!	0	0	#DIV/0!	14.8894	0.624651	4.19527	1/22/21 Raw	34.985
	H-UNT-2-3-21	2/3/21 Raw	1.24389	0.0127732	1.02688	4.64983	0.112407	2.41745	2.36301	0.0651221	2.7559	13.4476	0.379042	2.81867	1.31471	0.0411424	3.12938	9.38082	0.322111	3.43372	0	0	#DIV/0!	0	0	#DIV/0!	14.5455	0.305875	2.10288	2/3/21 Raw	32.3998
	HV-UNT-2-19-21	2/19/21 Raw	1.36389	0.0430728	3.15809	5.82536	0.186714	3.20519	2.4973	0.0807205	3.23231	13.254	1.13732	8.58091	1.44851	0.01405	0.969966	6.48584	0.142172	2.19203	0	0	#DIV/0!	0	0	#DIV/0!	18.2582	0.824713	4.51695	2/19/21 Raw	30.8749
	V-UNT-3-5-21	3/5/21 Raw	1.32821	0.0863202	6.49897	5.88504	0.245892	4.17826	3.15319	0.140783	4.46477	12.9585	1.1237	8.67151	1.4234	0.0481537	3.38301	8.03014	0.185807	2.31387	0	0	#DIV/0!	0	0	#DIV/0!	16.3562	0.741207	4.53167	3/5/21 Raw	32.7785
130 deg C	H-STEX-(130-1)-2-3-21	130°C 1min	1.84345	0.0624062	3.3853	7.05105	0.0880031	1.24809	3.77224	0.094664	2.50949	17.0557	1.12421	6.59138	2.26424	0.0924201	4.08173	2.89689	0.140654	4.85535	0	0	#DIV/0!	0	0	#DIV/0!	29.1077	0.48968	1.68231	130°C 1min	34.8836
	H-STEX-(130-2)-1-22-21	130°C 2min	1.8683	0.105779	5.66175	5.88423	0.0985547	1.67489	3.33239	0.138289	4.14986	13.5427	1.06321	7.85085	2.15595	0.0542393	2.5158	2.11992	0.123631	5.83185	0	0	#DIV/0!	0	0	#DIV/0!	27.8672	0.586809	2.10573	130°C 2min	28.9035
	H-STEX-(130-4)-2-3-21	130°C 4min	1.82012	0.0809598	4.44804	7.60847	0.275444	3.62022	4.33744	0.205995	4.74923	25.0676	2.22312	8.8685	2.53029	0.0820748	3.24369	3.98172	0.310664	7.80227	0	0	#DIV/0!	0	0	#DIV/0!	26.6668	1.16905	4.38389	130°C 4min	45.3456
	V-STEX-(130-8)-3-5-21	130°C 8min	1.6765	0.0167412	0.99858	9.57608	0.240664	2.51318	4.82845	0.201357	4.17023	18.098	0.54677	3.02116	2.65133	0.143941	5.42902	2.32885	0.199591	8.57035	0	0	#DIV/0!	0	0	#DIV/0!	33.9549	1.10754	3.26179	130°C 8min	39.1592
150 deg C	V-STEX-(150-1)-3-5-21	150°C 1min	1.46193	0.0424065	2.90072	8.35499	0.217892	2.60793	4.17949	0.103434	2.4748	11.18	0.955816	8.54934	2.40933	0.116503	4.83551	1.78242	0.0806909	4.52705	0	0	#DIV/0!	0	0	#DIV/0!	28.1338	0.866506	3.07995	150°C 1min	29.3682
	H-STEX-(150-2)-1-12-21	150°C 2min	1.64501	0.0360051	2.18874	7.82205	0.0850224	1.08696	4.03854	0.06712	1.66198	18.2028	1.30199	7.15267	2.91317	0.0887109	3.04516	1.96084	0.129718	6.61542	0	0	#DIV/0!	0	0	#DIV/0!	27.1997	0.355657	1.30758	150°C 2min	36.5824
	H-STEX-(150-4)-12-11-20	150°C 4min	1.70938	0.105983	6.20009	6.67391	0.0140786	0.210949	3.84413	0.048158	1.25277	34.5184	1.02394	2.96637	3.31733	0.0727378	2.19266	3.17993	0.306582	9.64116	0	0	#DIV/0!	0	0	#DIV/0!	20.7217	0.0995158	0.48025	150°C 4min	53.2431
	HV-STEX-(150-8)-2-19-21	150°C 8min	1.96225	0.160496	8.17919	6.05671	0.0387992	0.640599	4.47086	0.115305	2.57903	28.9797	0.479168	1.65346	3.19188	0.153103	4.79666	2.46936	0.0313166	1.26821	0	0	#DIV/0!	0	0	#DIV/0!	22.0854	0.10628	0.481221	150°C 8min	47.1307
170 deg C	H-STEX-(170-1)-12-11-20	170°C 1min	2.00359	0.0953739	4.76015	7.81372	0.0945259	1.20974	4.39949	0.103808	2.35955	25.0842	1.55488	6.19863	3.31456	0.185055	5.58308	3.23406	0.209963	6.49226	0	0	#DIV/0!	0	0	#DIV/0!	21.8193	0.320165	1.46735	170°C 1min	45.8496
	HV-STEX-(170-2)-2-19-21	170°C 2min	1.55751	0.0766	4.9181	6.12884	0.136806	2.23217	4.51254	0.123476	2.73629	27.5917	1.62939	5.90535	3.51737	0.0825058	2.34567	2.12091	0.118557	5.58992	0	0	#DIV/0!	0	0	#DIV/0!	22.5748	0.925435	4.09941	170°C 2min	45.4289
	H-STEX-(170-4)-1-22-21	170°C 4min	2.45201	0.0550761	2.24616	4.40032	0.0319142	0.725268	5.571	0.134606	2.4162	44.8993	0.86321	1.92255	4.7988	0.21281	4.43465	3.66223	0.0246777	0.673843	0	0	#DIV/0!	0	0	#DIV/0!	13.2564	0.267373	2.01693	170°C 4min	65.7837
	H-STEX-(170-8)-1-12-21	170°C 8min	0.524245	0.0392601	7.4889	2.03075	0.035426	1.74448	4.65851	0.162815	3.495	26.4201	1.54011	5.82931	4.5267	0.152579	3.37065	0	0	#DIV/0!	0	0	#DIV/0!	0	0	#DIV/0!	6.89121	0.241301	3.50158	170°C 8min	38.1603

[truncated: 3 more sheets: Color, PCA analysis, Correlations]
